# Supplementary material
Source: PubMed Central journal article supplement (PMC2755539)

## Supporting Information

### Direct Diazo-Transfer Reaction on $\beta$ -lactam:

#### Synthesis and Preliminary Biological Activities of 6-Triazolylpenicillanic Acids

Po C. Chen, Rebekah E. Emrich, Pratiq A. Patel, and Adegboyega K. Oyelere\*

School of Chemistry and Biochemistry, Parker H. Petit Institute for Bioengineering and

Biosciences, Georgia Institute of Technology, Atlanta, GA 30332-0400, USA

#### Content:

<sup>1</sup>H-NMR spectra of compound **3a** (S3)

<sup>1</sup>H-NMR spectra of compound **3b** (S4)

<sup>1</sup>H-NMR spectra of compound **3c** (S5)

<sup>13</sup>C-NMR and <sup>1</sup>H-NMR spectra of compound **5a** (S6-S7)

<sup>13</sup>C-NMR and <sup>1</sup>H-NMR spectra of compound **5b** (S8-S9)

<sup>13</sup>C-NMR and <sup>1</sup>H-NMR spectra of compound **5c** (S10-S11)

<sup>13</sup>C-NMR and <sup>1</sup>H-NMR spectra of compound **7** (S12-S13)

<sup>1</sup>H-NMR spectra of compound **10f** (S14)

<sup>1</sup>H-NMR spectra of compound **10h** (S15)

<sup>1</sup>H-NMR spectra of compound **10i** (S16)

<sup>1</sup>H-NMR spectra of compound **10k** (S17)

<sup>1</sup>H-NMR spectra of compound **10l** (S18)

<sup>13</sup>C-NMR and <sup>1</sup>H-NMR spectra of compound **8a** (S19-S20)

<sup>13</sup>C-NMR and <sup>1</sup>H-NMR spectra of compound **8b** (S21-S22)

<sup>13</sup>C-NMR and <sup>1</sup>H-NMR spectra of compound **8c** (S23-S24)

<sup>13</sup>C-NMR and <sup>1</sup>H-NMR spectra of compound **9a** (S25-S26)

<sup>13</sup>C-NMR and <sup>1</sup>H-NMR spectra of compound **9b** (S27-S28)

<sup>13</sup>C-NMR and <sup>1</sup>H-NMR spectra of compound **11a** (S29-S30)

<sup>13</sup>C-NMR and <sup>1</sup>H-NMR spectra of compound **11b** (S31-S32)

<sup>13</sup>C-NMR and <sup>1</sup>H-NMR spectra of compound **11c** (S33-S34)

<sup>13</sup>C-NMR and <sup>1</sup>H-NMR spectra of compound **11d** (S35-S36)

<sup>13</sup>C-NMR and <sup>1</sup>H-NMR spectra of compound **11e** (S37-S38)

<sup>13</sup>C-NMR and <sup>1</sup>H-NMR spectra of compound **11f** (S39-S40)

<sup>1</sup>H-NMR spectra of compound **11g** (S41)

<sup>13</sup>C-NMR and <sup>1</sup>H-NMR spectra of compound **11h** (S42-S43)

<sup>13</sup>C-NMR and <sup>1</sup>H-NMR spectra of compound **11i** (S44-S45)

<sup>13</sup>C-NMR and <sup>1</sup>H-NMR spectra of compound **11j** (S46-S47)

<sup>13</sup>C-NMR and <sup>1</sup>H-NMR spectra of compound **11k** (S48-S49)

<sup>13</sup>C-NMR and <sup>1</sup>H-NMR spectra of compound **11l** (S50-S51)

<sup>13</sup>C-NMR and <sup>1</sup>H-NMR spectra of compound **12a** (S52-S53)

<sup>13</sup>C-NMR and <sup>1</sup>H-NMR spectra of compound **12b** (S54-S55)

<sup>13</sup>C-NMR and <sup>1</sup>H-NMR spectra of compound **12c** (S56-S57)

<sup>13</sup>C-NMR and <sup>1</sup>H-NMR spectra of compound **12d** (S58-S59)

<sup>13</sup>C-NMR and <sup>1</sup>H-NMR spectra of compound **12e** (S60-S61)

<sup>1</sup>H-NMR spectra of compound **12f** (S62)

<sup>1</sup>H-NMR spectra of compound **12g** (S63)

<sup>13</sup>C-NMR and <sup>1</sup>H-NMR spectra of compound **12h** (S64-S65)

<sup>1</sup>H-NMR spectra of compound **12i** (S66)

<sup>13</sup>C-NMR and <sup>1</sup>H-NMR spectra of compound **12j** (S67-S68)

<sup>1</sup>H-NMR spectra of compound **12k** (S69)

<sup>1</sup>H-NMR spectra of compound **12l** (S70)

<sup>1</sup>H NMR of **3a**:

A0-1-23

Pulse Sequence: szpu1

USER: hchen

DATE: Jun 11 2006

File: exp

Solvent: DMSO

Ambient temperature

Mercury-400BB "r2d2"

PULSE SEQUENCE

Relax. delay 1.000 sec

Pulse 37.5 degrees

Acq. time 2.000 sec

Width 3999.8 Hz

18 repetitions

Observed frequency 99.9831472 MHz

Observed processing

File size 32768

Total time 0 min, 50 sec

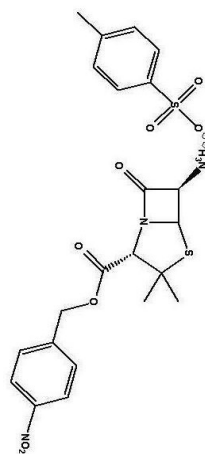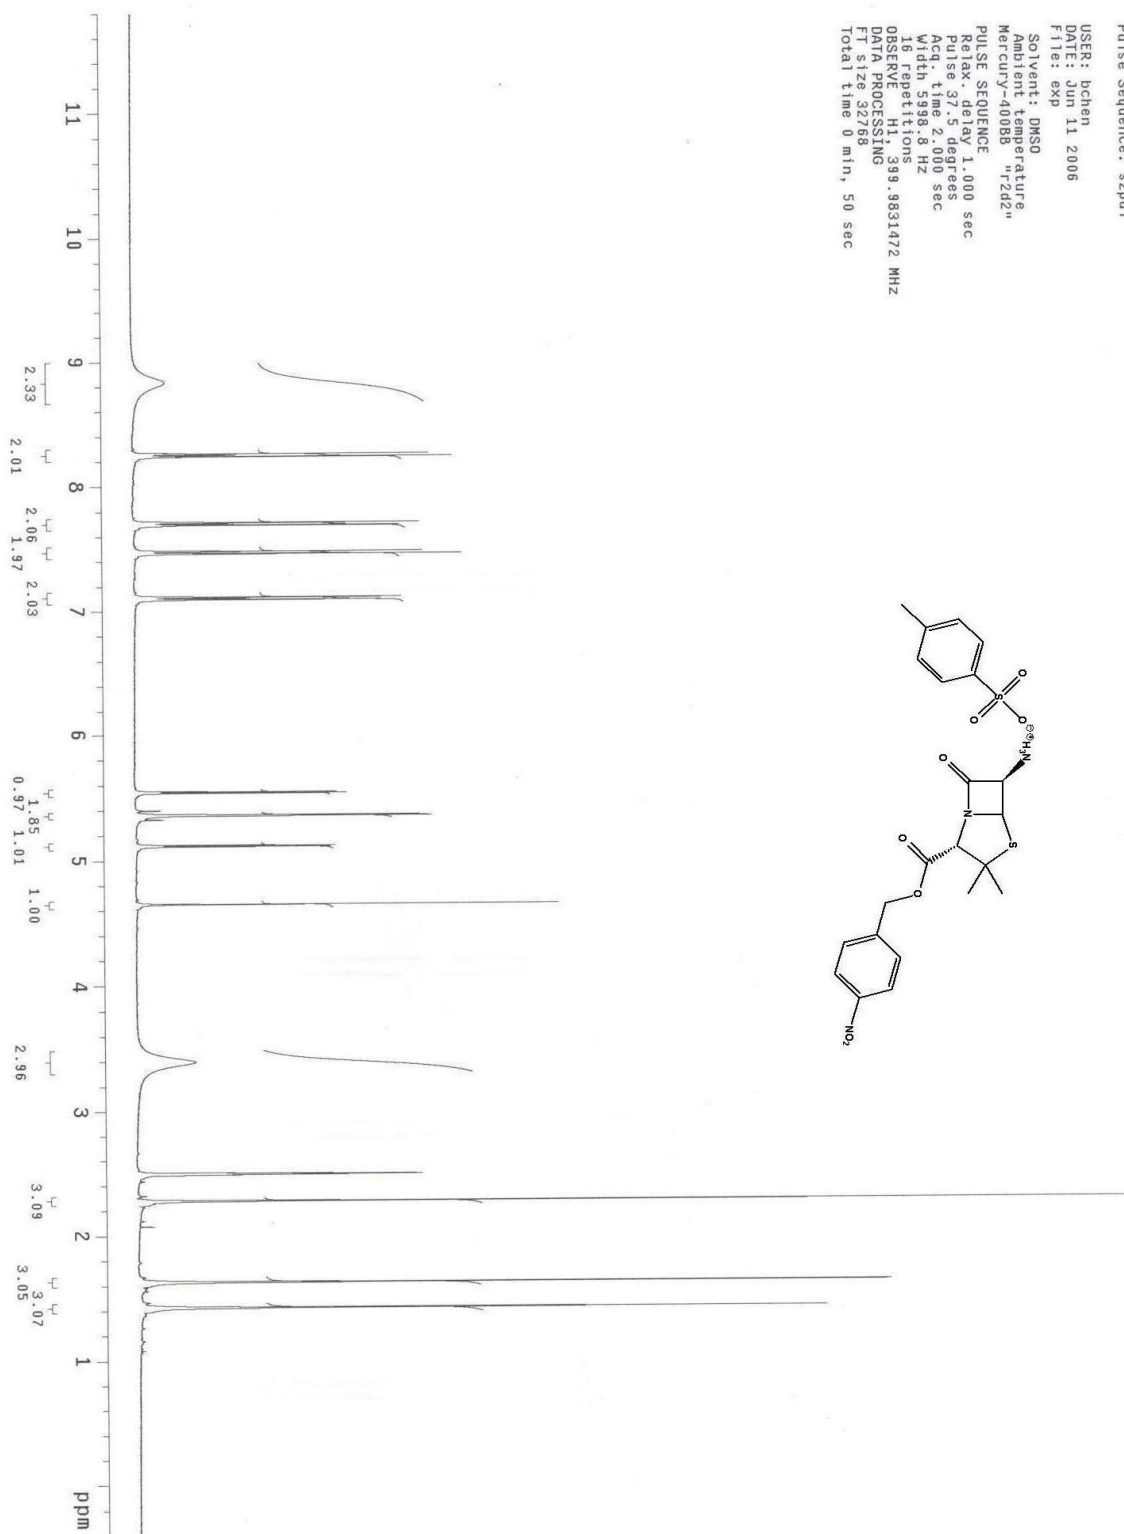

<sup>1</sup>H NMR of **3b**:

ao-1-60  
 Pulse Sequence: s2pu1  
 USER: bchen  
 DATE: Jun 11 2006  
 File: exp  
 Solvent: DMSO  
 Ambient temperature  
 Mercury-400BB "P2D2"  
 PULSE SEQUENCE  
 Relax. delay 1.000 sec  
 Pulse 37.5 degrees  
 Acq. time 2.000 sec  
 Width 5998.8 Hz  
 16 Repetitions  
 OBSERVE H1, 399.9831472 MHZ  
 DATA PROCESSING  
 FT size 32768  
 Total time 0 min, 50 sec

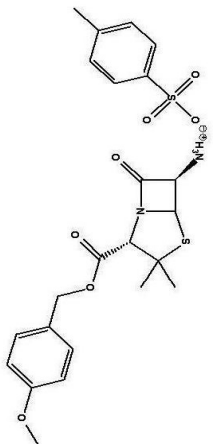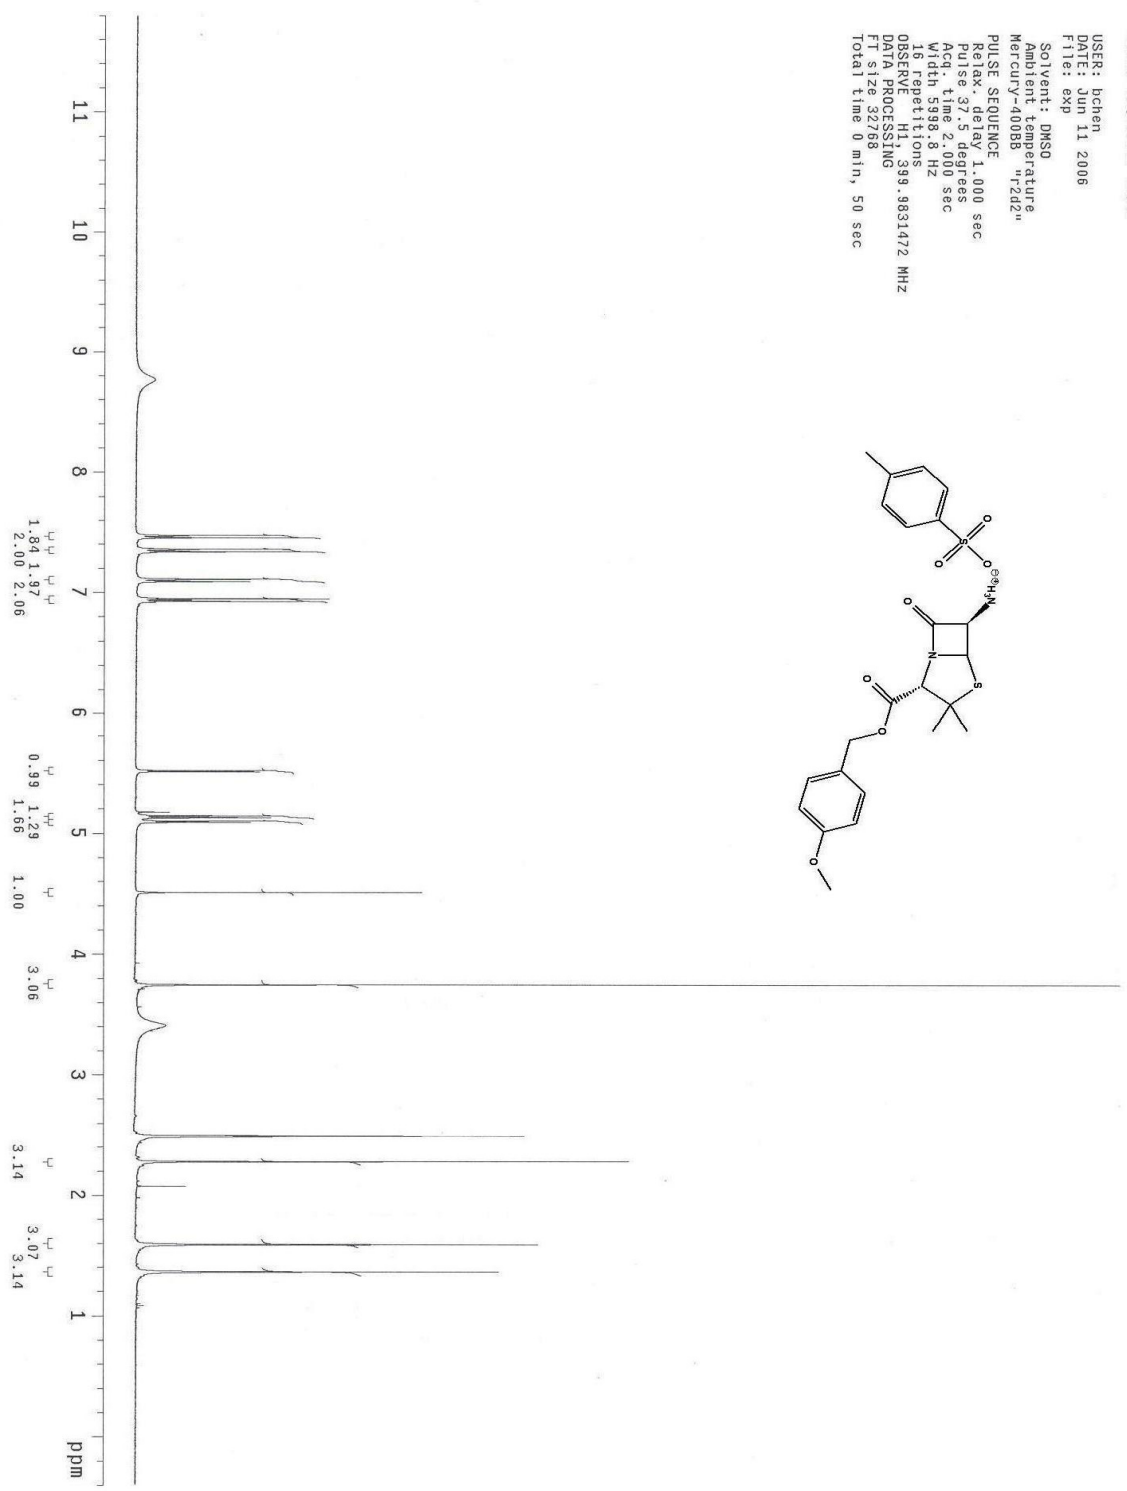

<sup>1</sup>H NMR of 3c:

bob-2-140  
Pulse Sequence: szpu1

USER: bchen  
DATE: Jun 11 2006  
File: exp  
Solvent: DMSO  
Ambient temperature  
Mercury-400BB "F242"  
PULSE SEQUENCE  
Relax: delay 1.000 sec  
Pulse: 31.0 deg/sec  
Acq: 4.00 sec  
Width: 5998.8 Hz  
16 Repetitions  
OBSERVE: H1 399.9831464 MHz  
DATA PROCESSING  
FT size 32768  
Total time 0 min, 50 sec

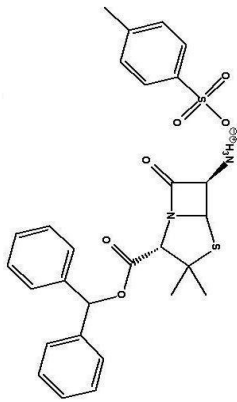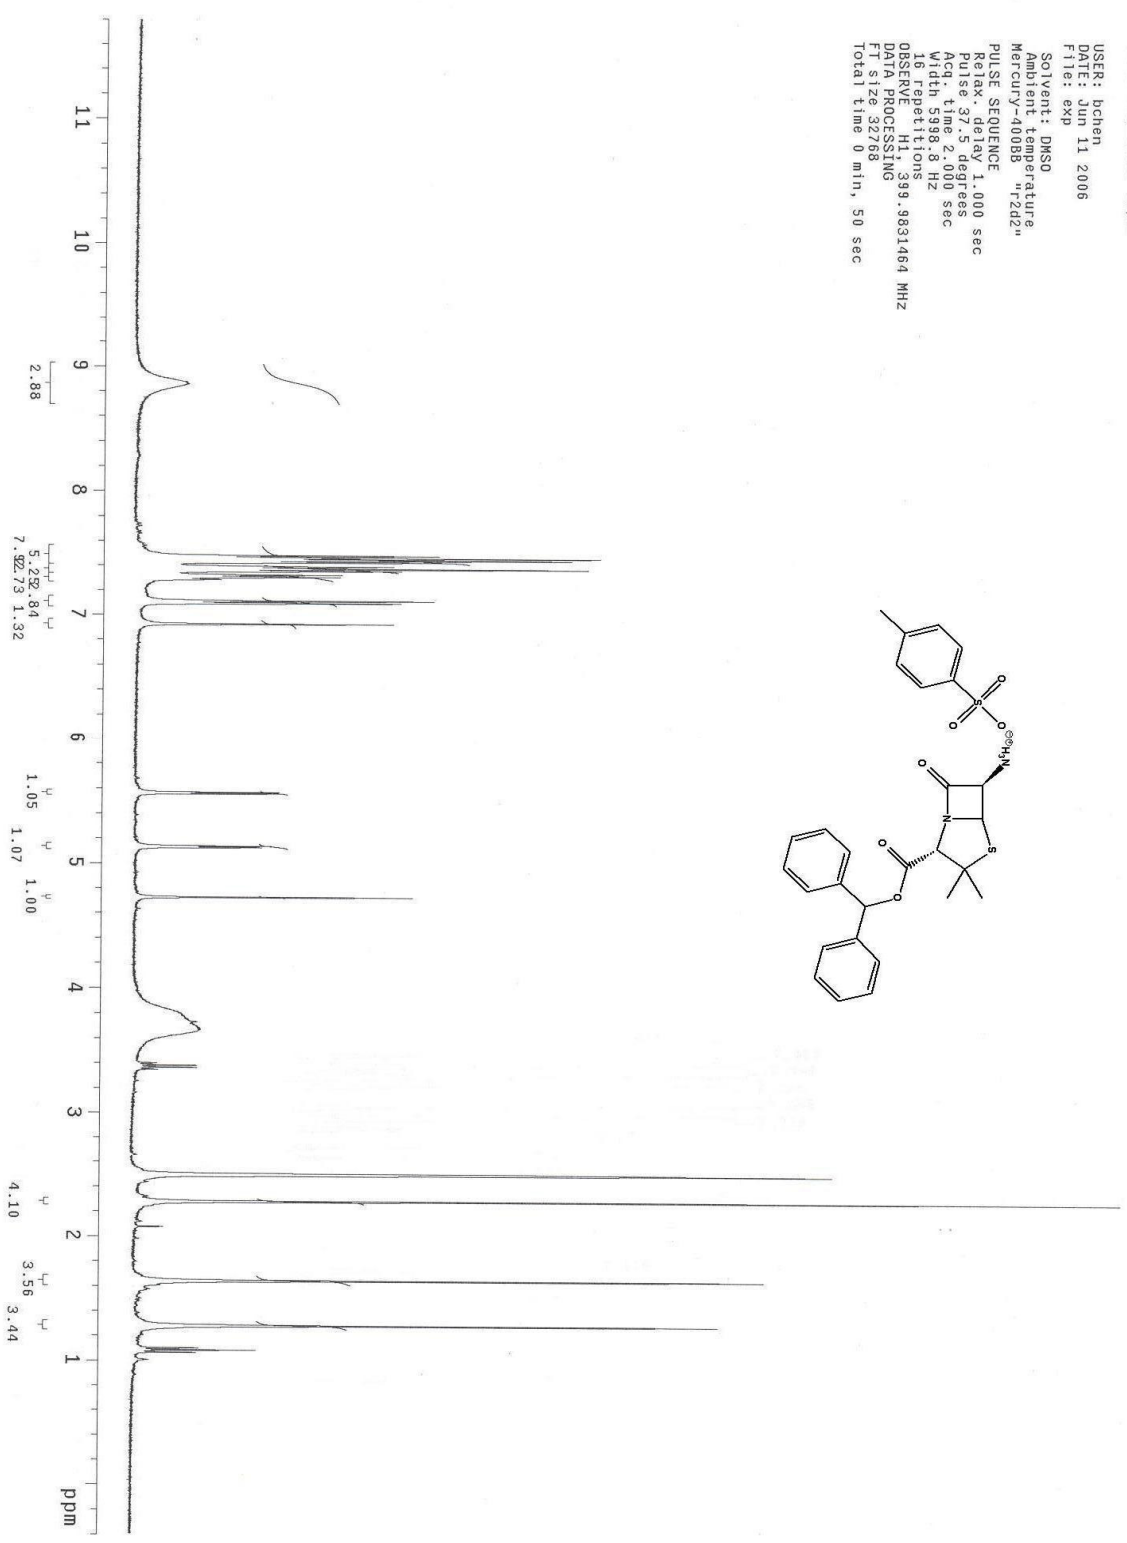

<sup>13</sup>C NMR of 5a:

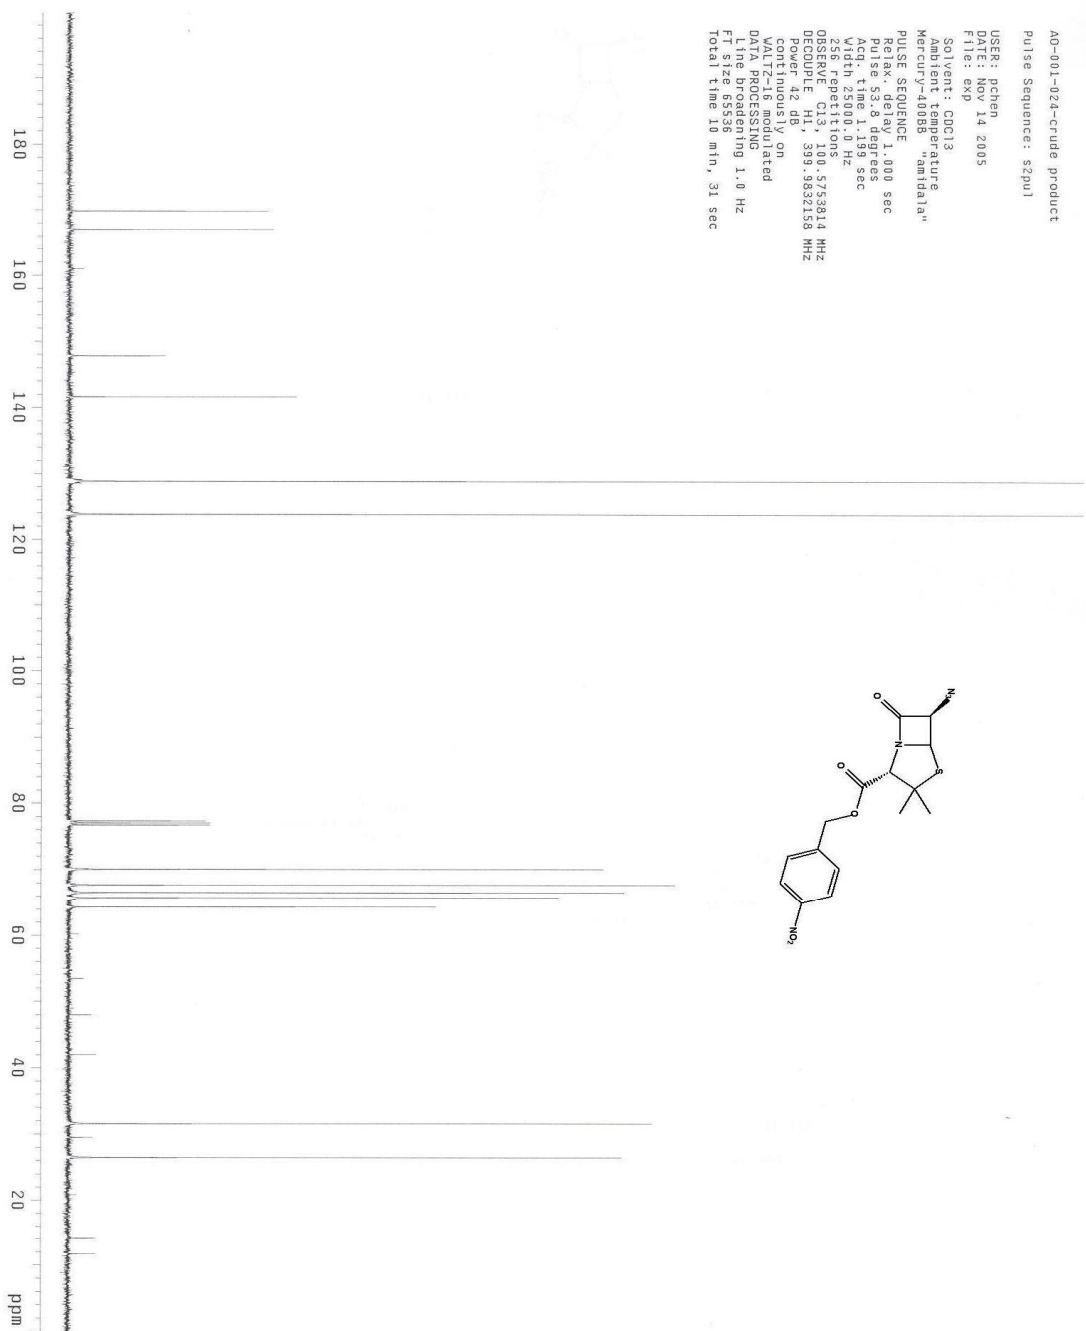

<sup>1</sup>H NMR of 5a:

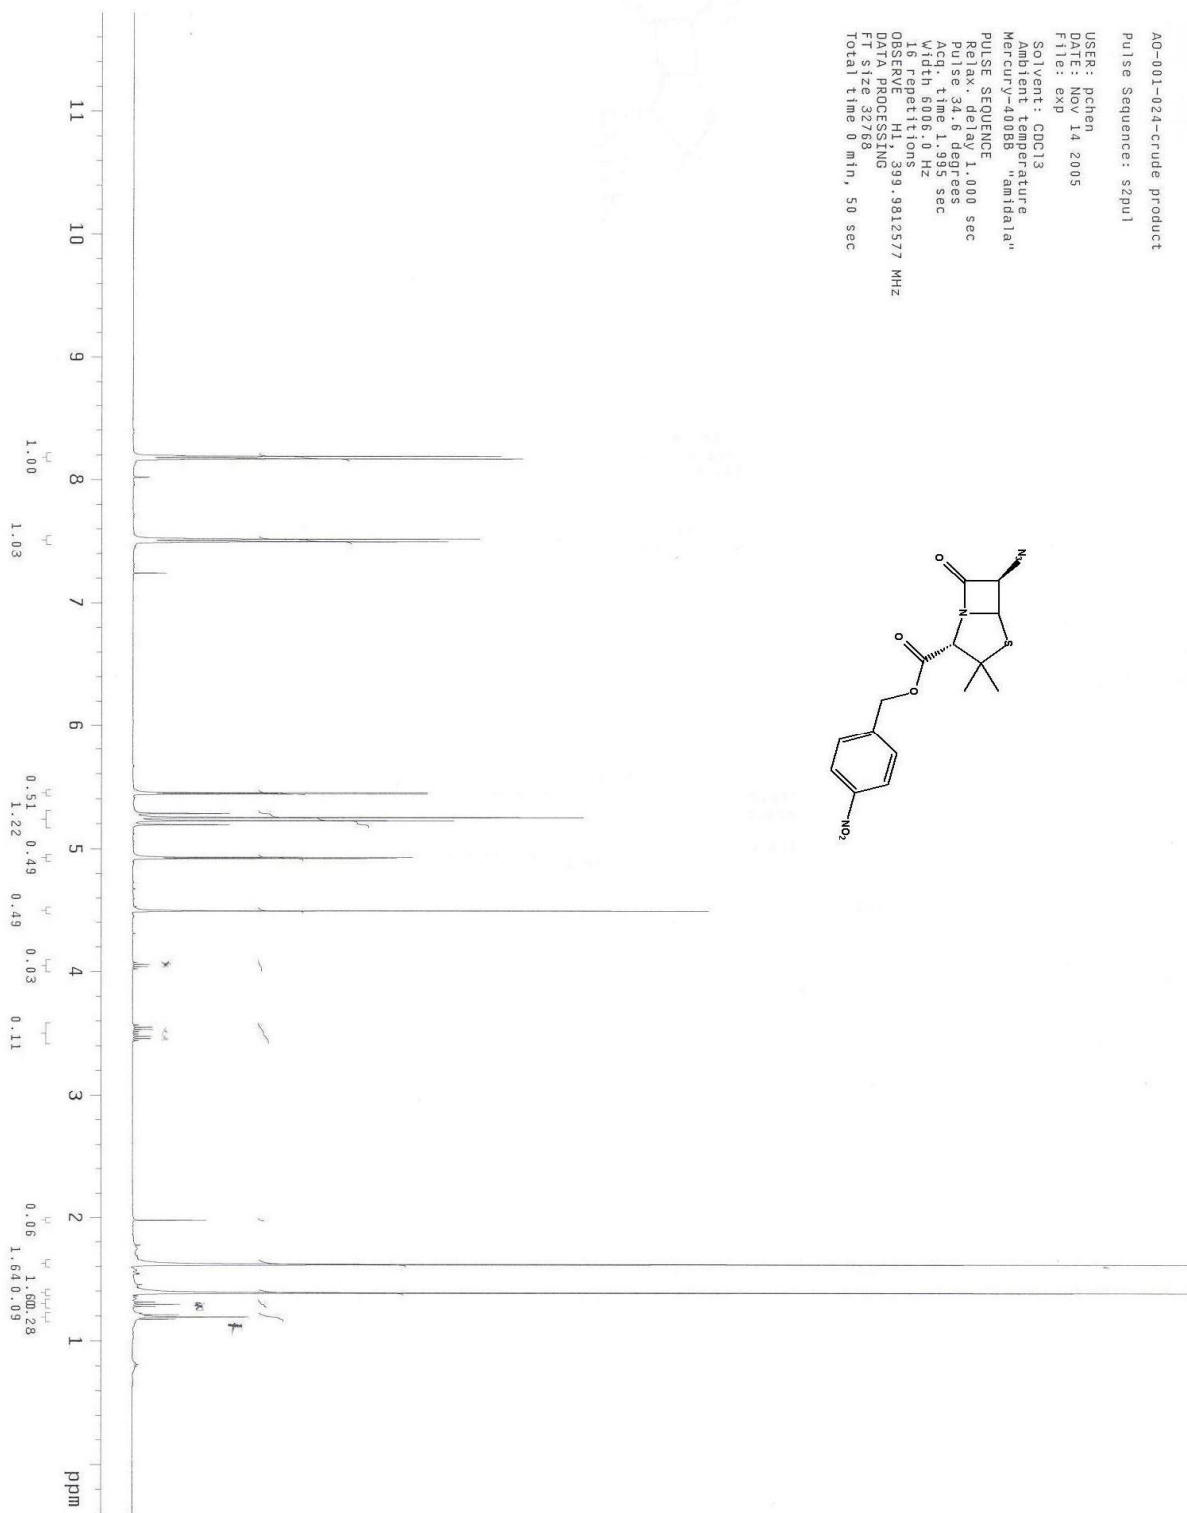



<sup>13</sup>C NMR of 5b:

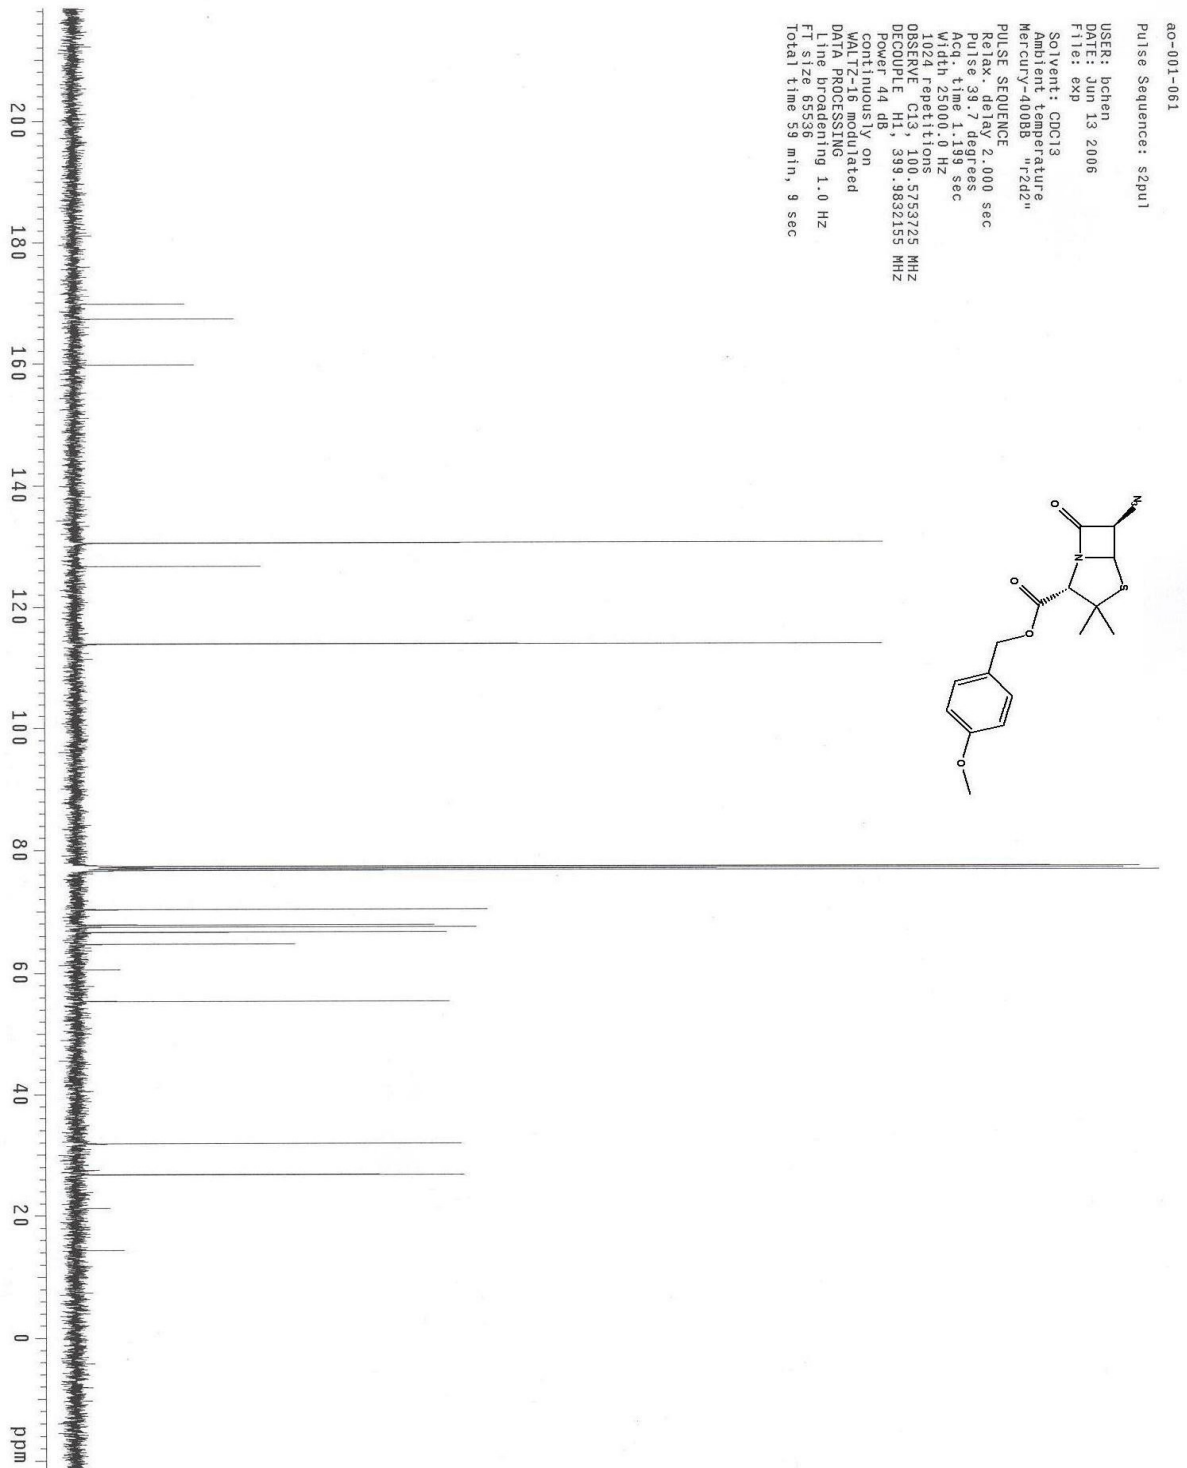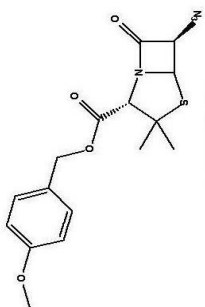

ao-001-081  
Pulse Sequence: s2pu1  
USER: bchen  
DATE: Jun 13 2006  
File: exp  
Solvent: CDCl3  
Ambient temperature  
Mercury-400BB "r2d2"  
PULSE SEQUENCE  
Relax: delay 2.000 sec  
Pulse: 39.7 degrees  
Acq: time 1.39 sec  
1024 repetitions  
OBSERVE C13, 100.5753725 MHz  
DECUPLE H1, 399.9832155 MHz  
Power 44 dB  
continuously on  
WALTZ-16 modulated  
DATA PROCESSING  
Line broadening 1.0 Hz  
FT size 65536  
Total time 59 min, 9 sec

<sup>1</sup>H NMR of **5b**:

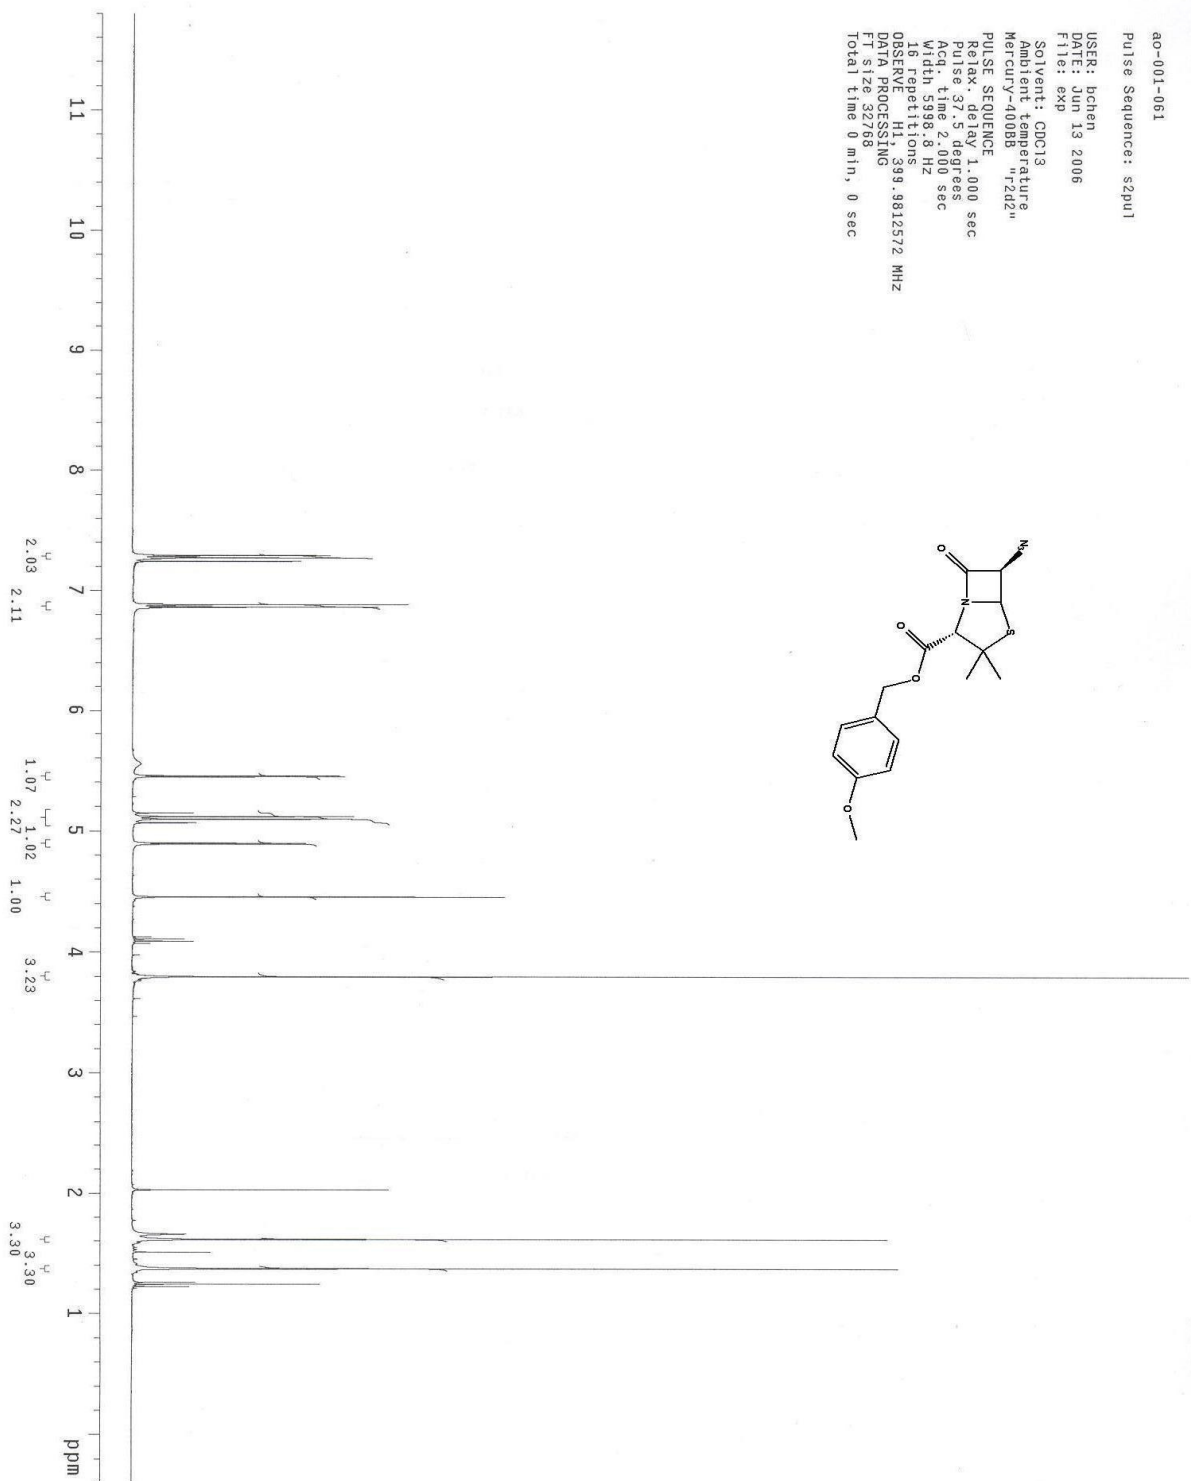

<sup>13</sup>C NMR of 5c:

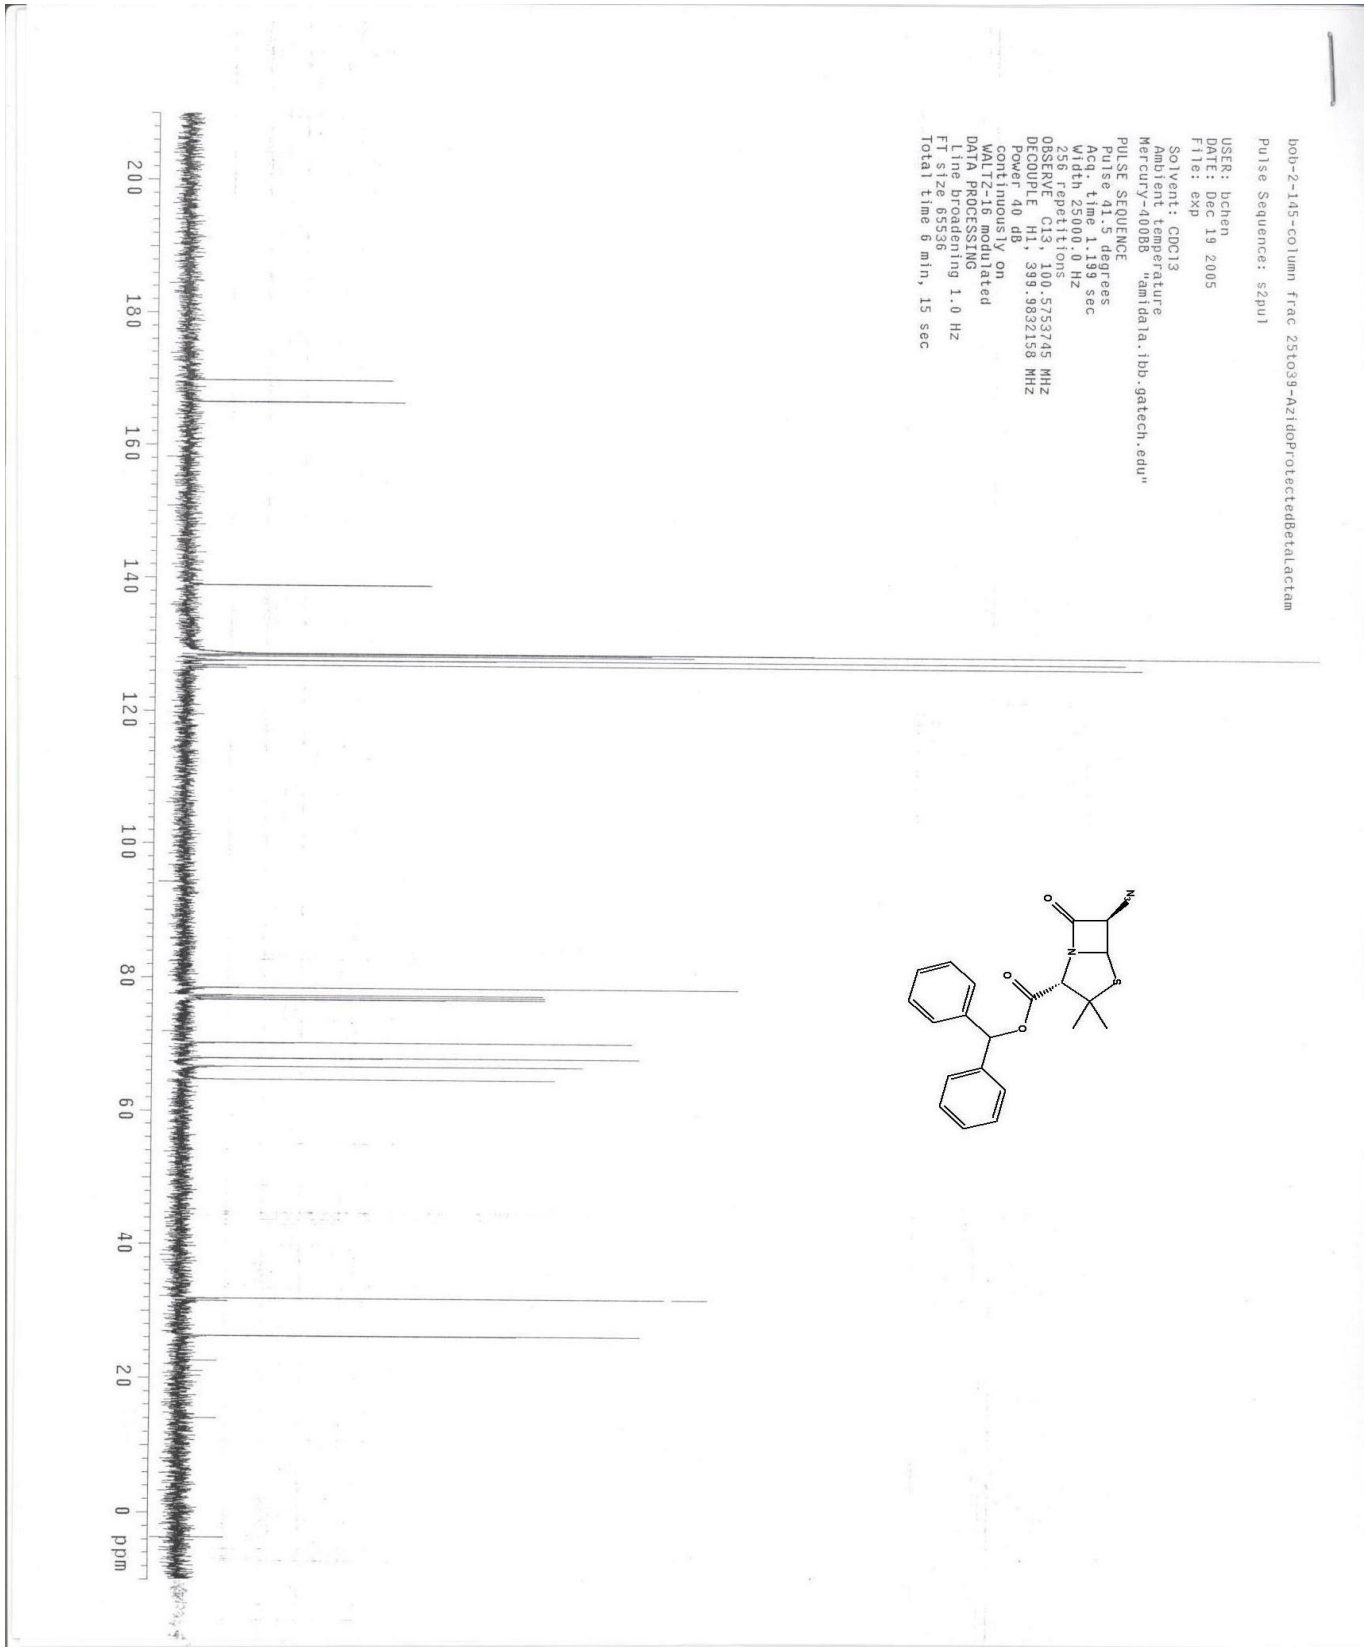

<sup>1</sup>H NMR of 5c:

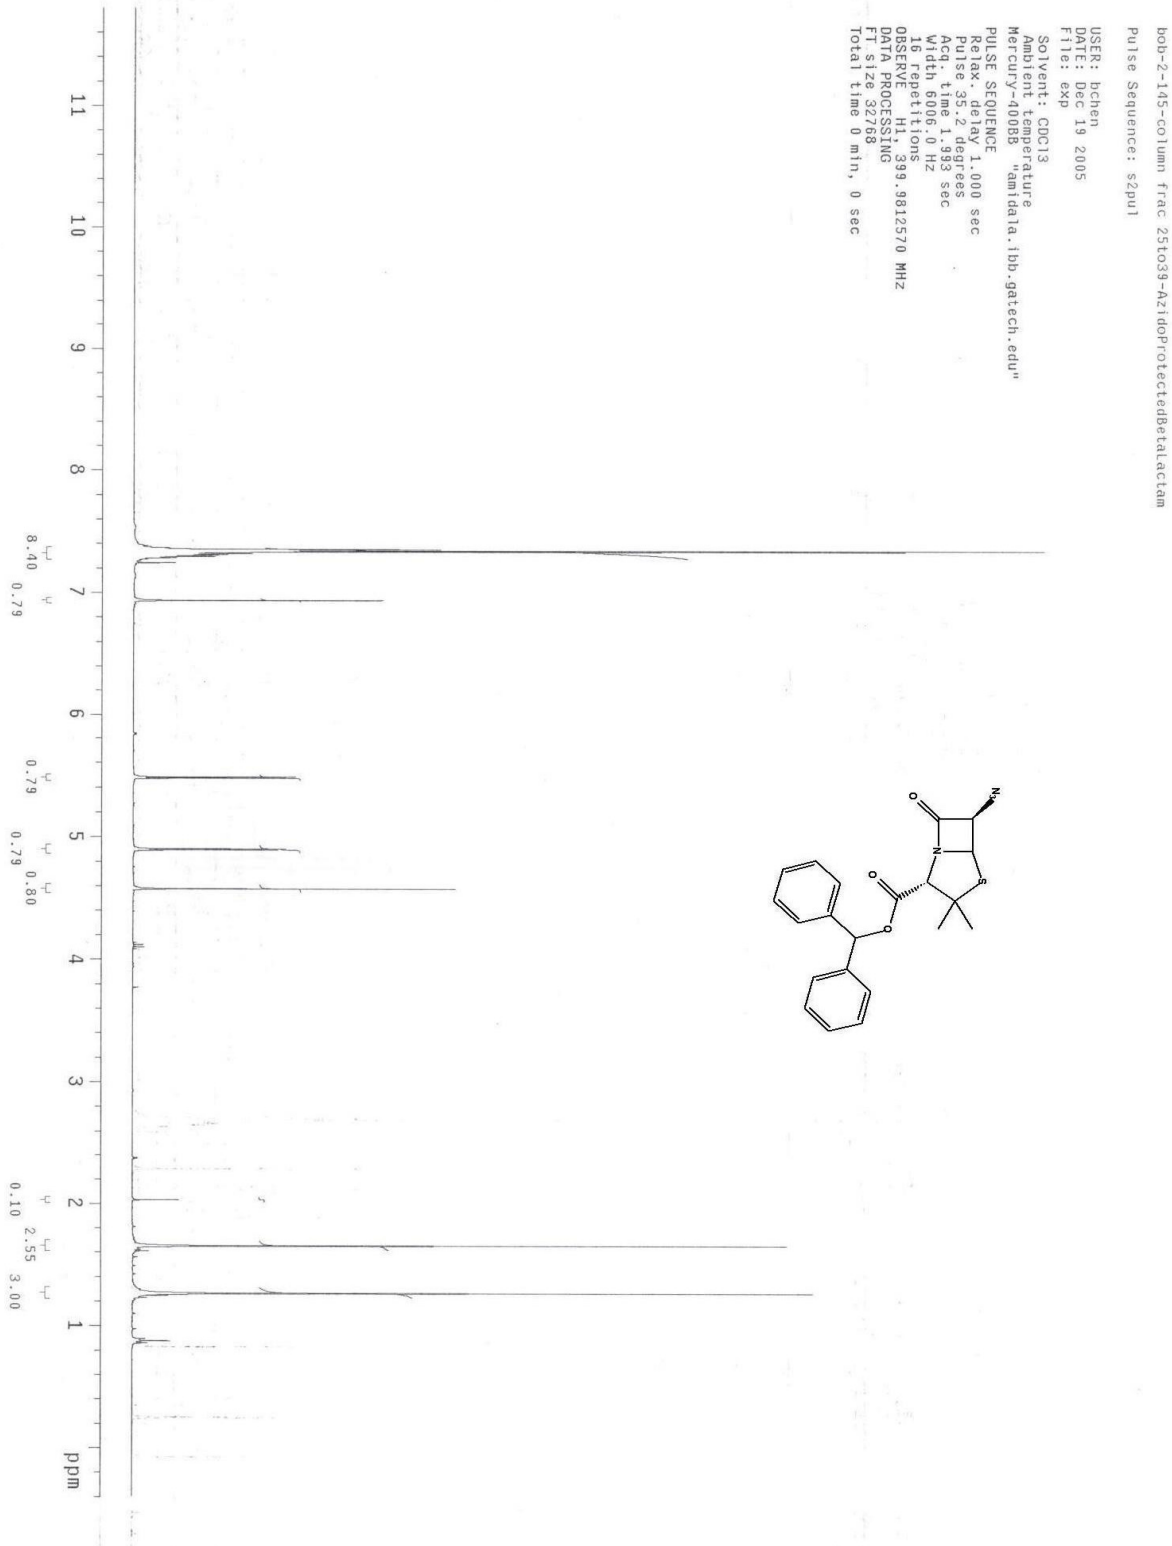

<sup>13</sup>C NMR of 7:

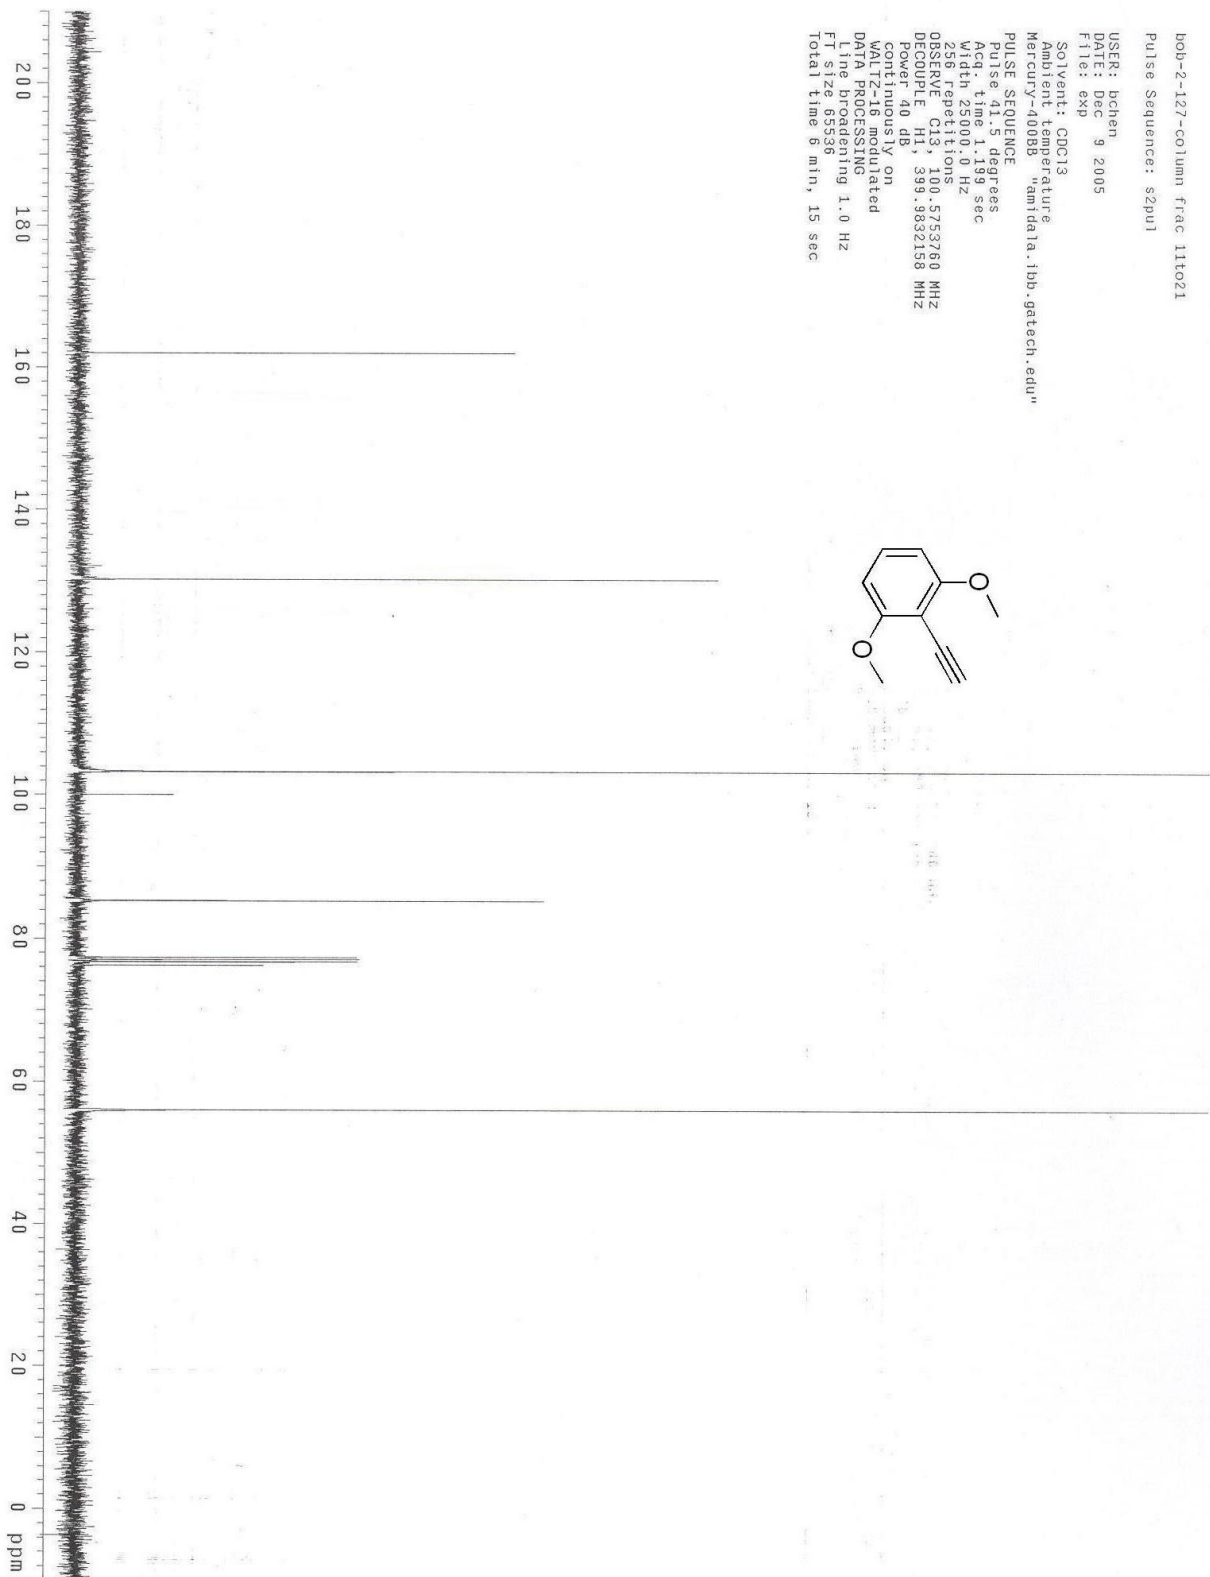

<sup>1</sup>H NMR of 7:

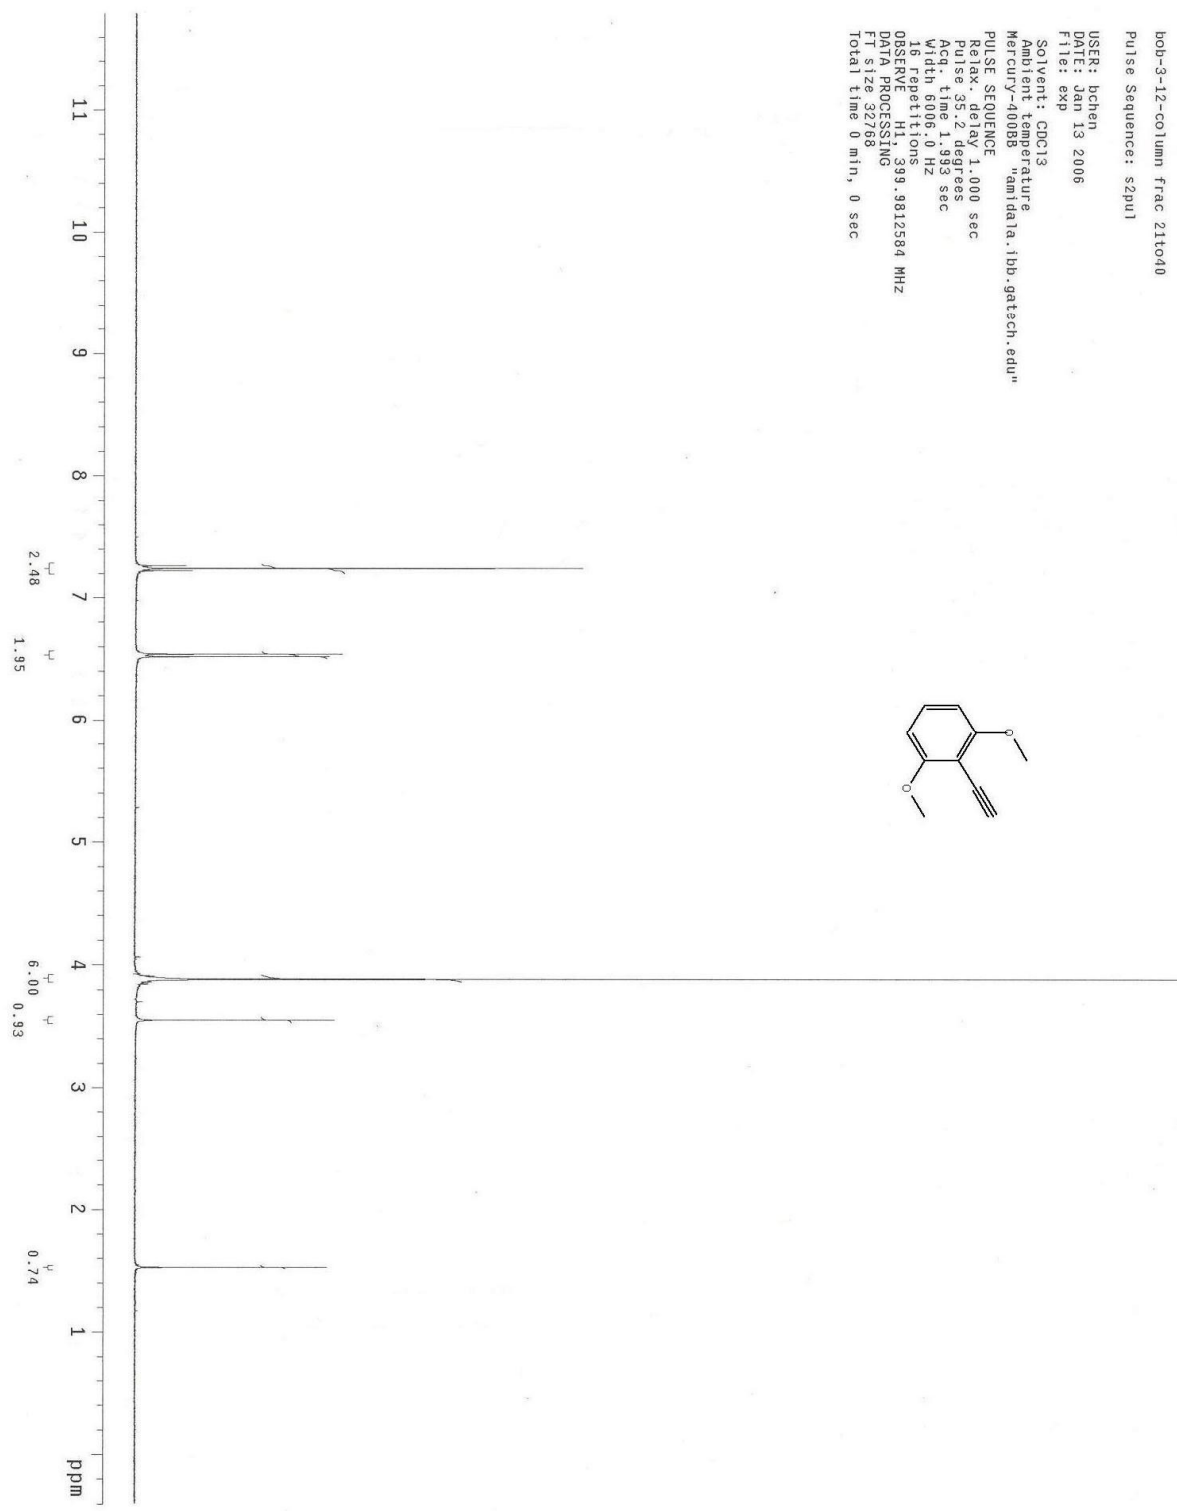

<sup>1</sup>H NMR of 10f:

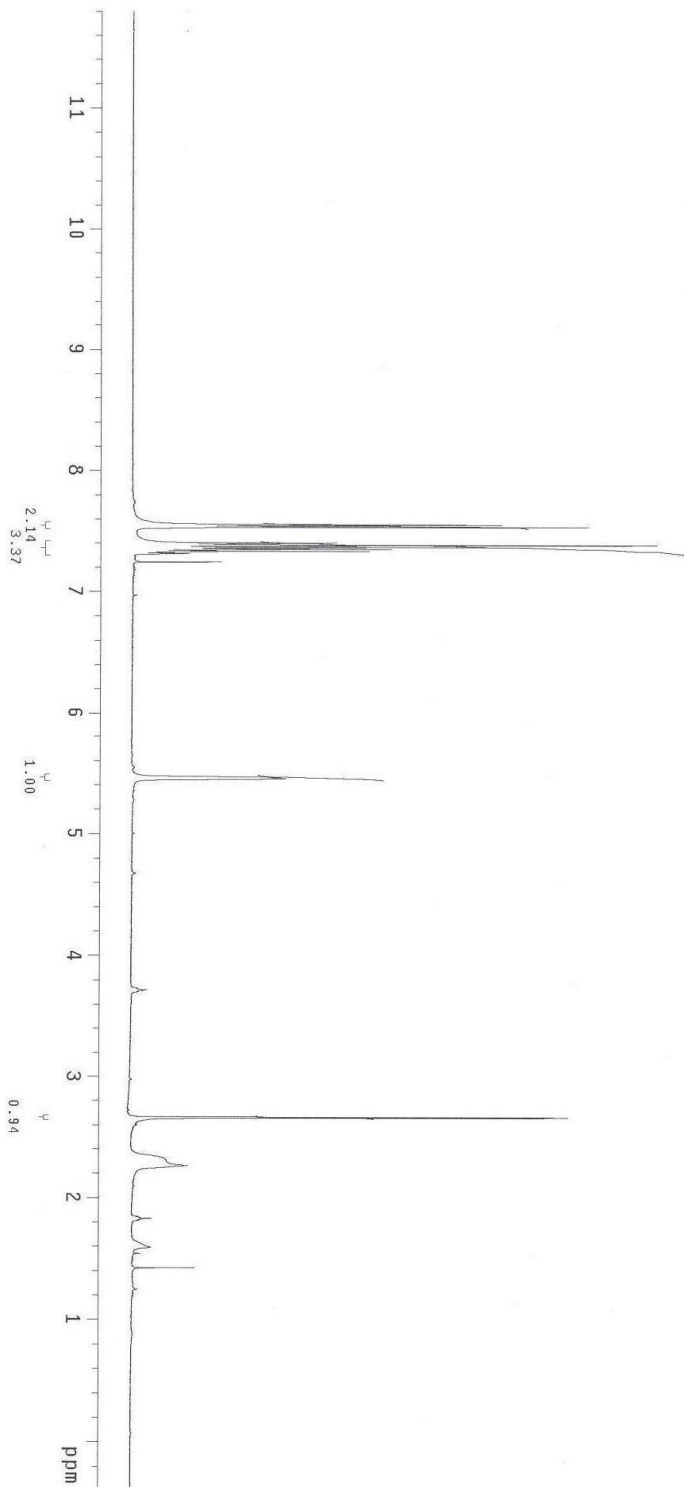

bob-4-29-Benzaldehyde+ethynyl]MgBr  
Pulse Sequence: s2pul1  
USER: bchen  
DATE: Jul 24 2006  
File: exp  
Solvent: CDCl3  
Ambient temperature  
Mercury-400BB "r2d2"  
PULSE SEQUENCE  
Relax: d81  
Pulse: 1.000 sec  
Acq. time: 2.000 sec  
Width: 5998.8 Hz  
16 Repetitions  
OBSERVE: H1, 399.9747427 MHz  
DATA PROCESSING  
FT size 32768  
Total time 0 min, 0 sec

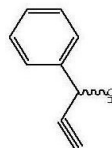

<sup>1</sup>H NMR of 10h:

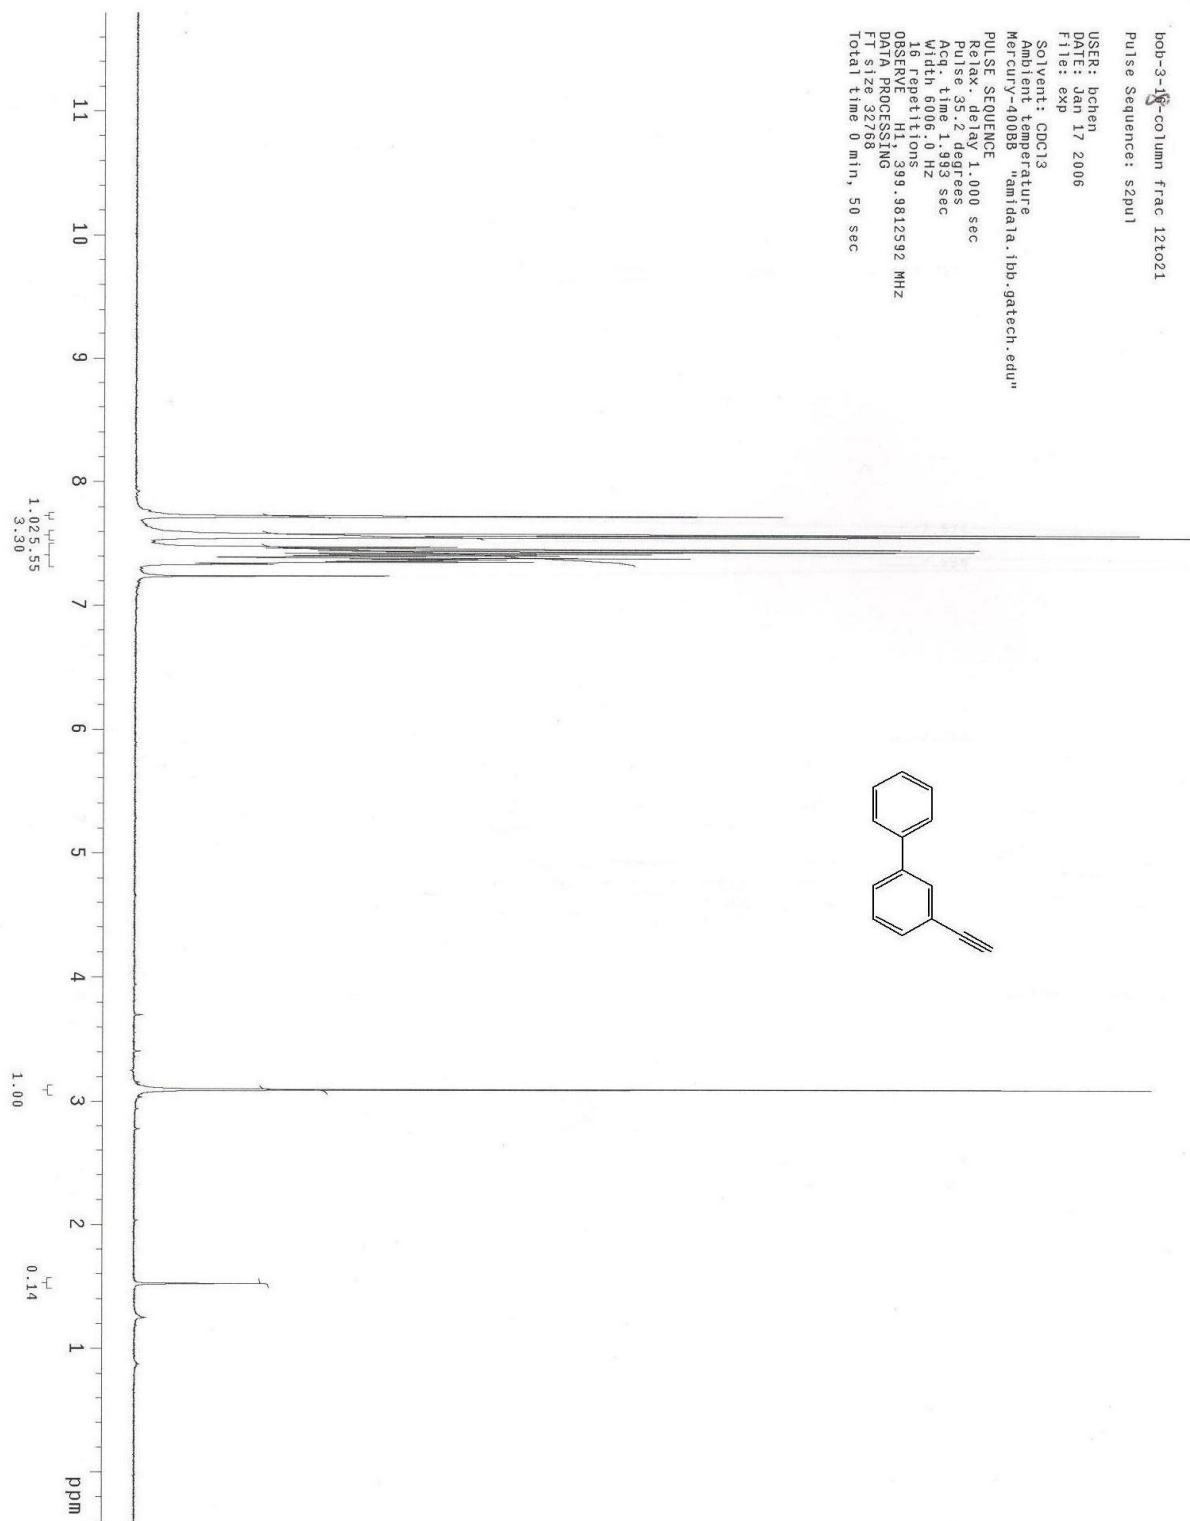



<sup>1</sup>H NMR of 10i:

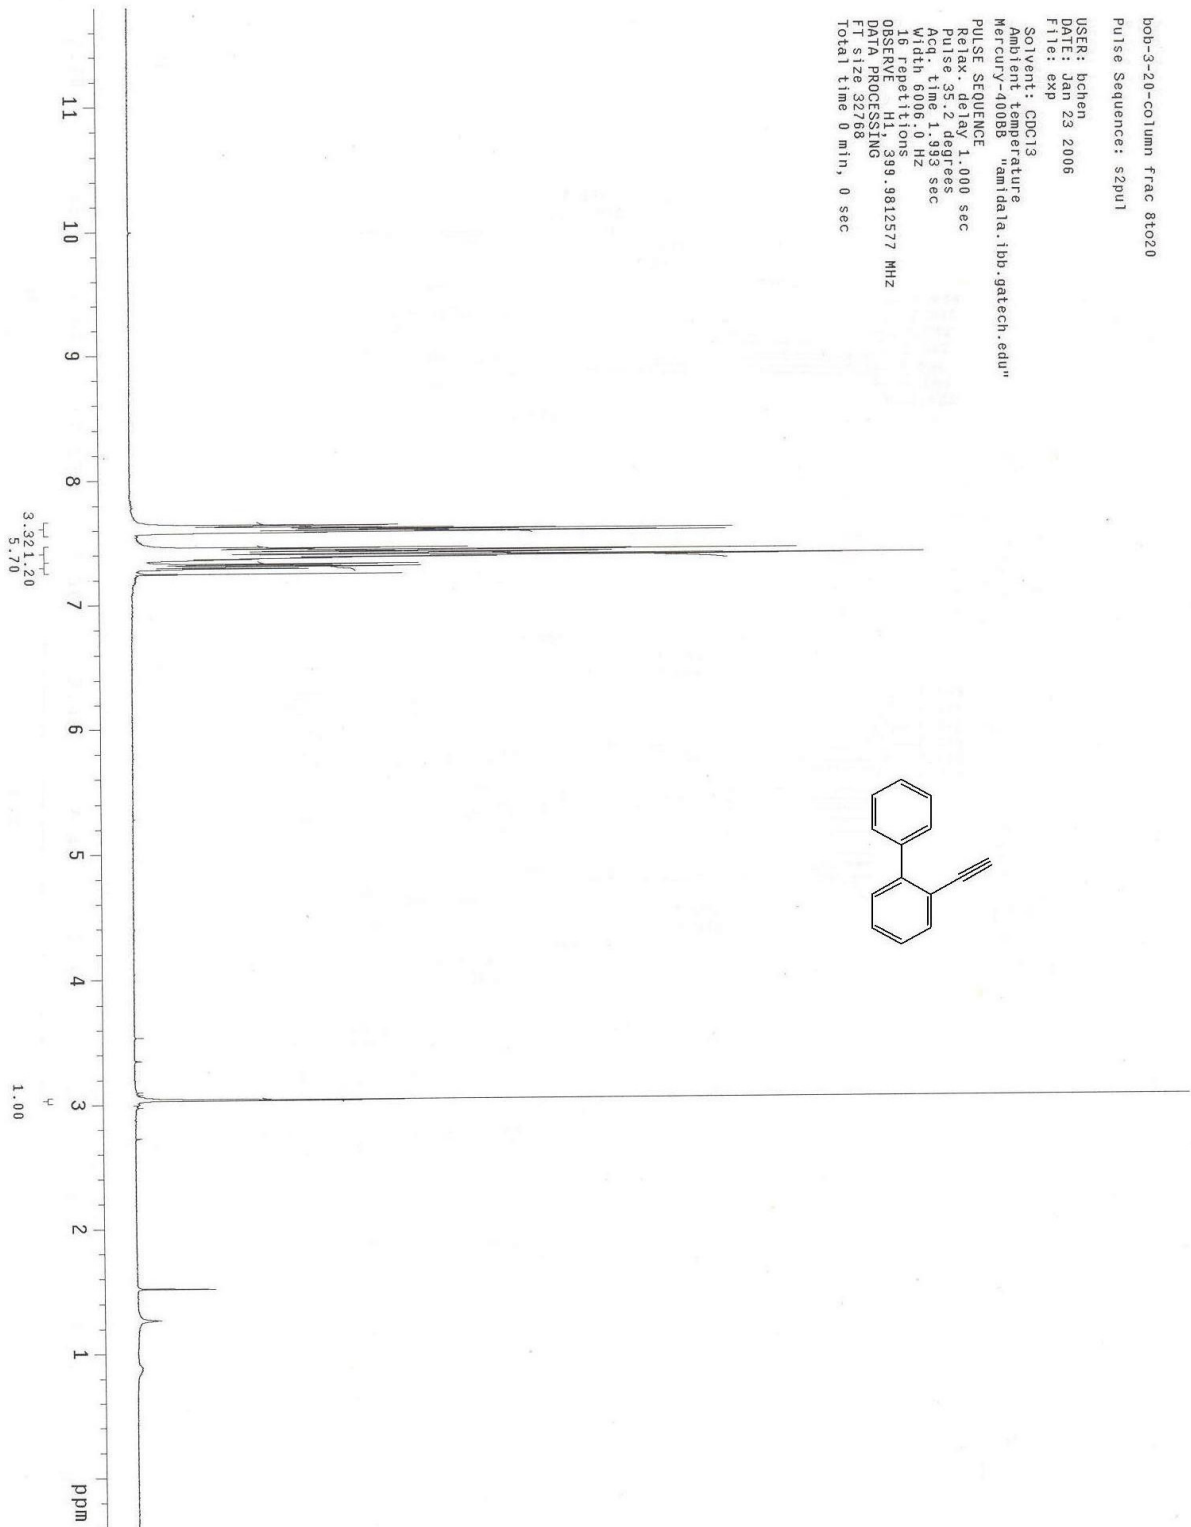

<sup>1</sup>H NMR of 10k:

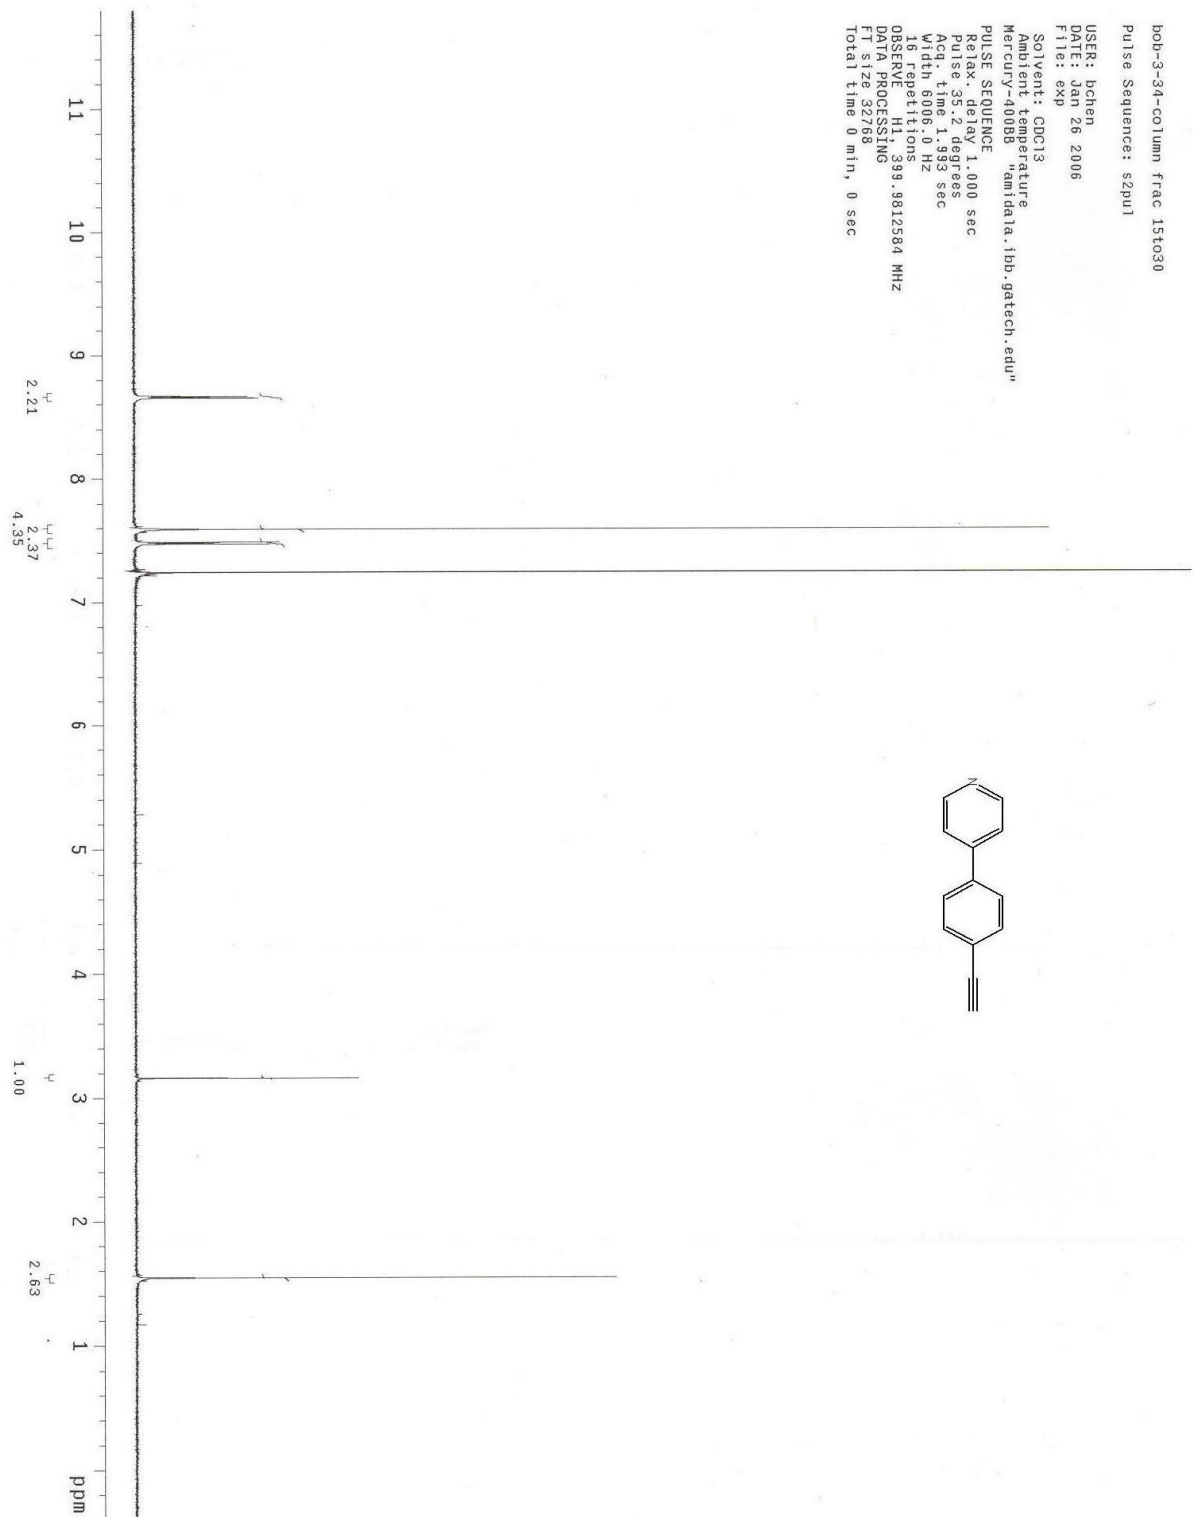

<sup>1</sup>H NMR of 10l:

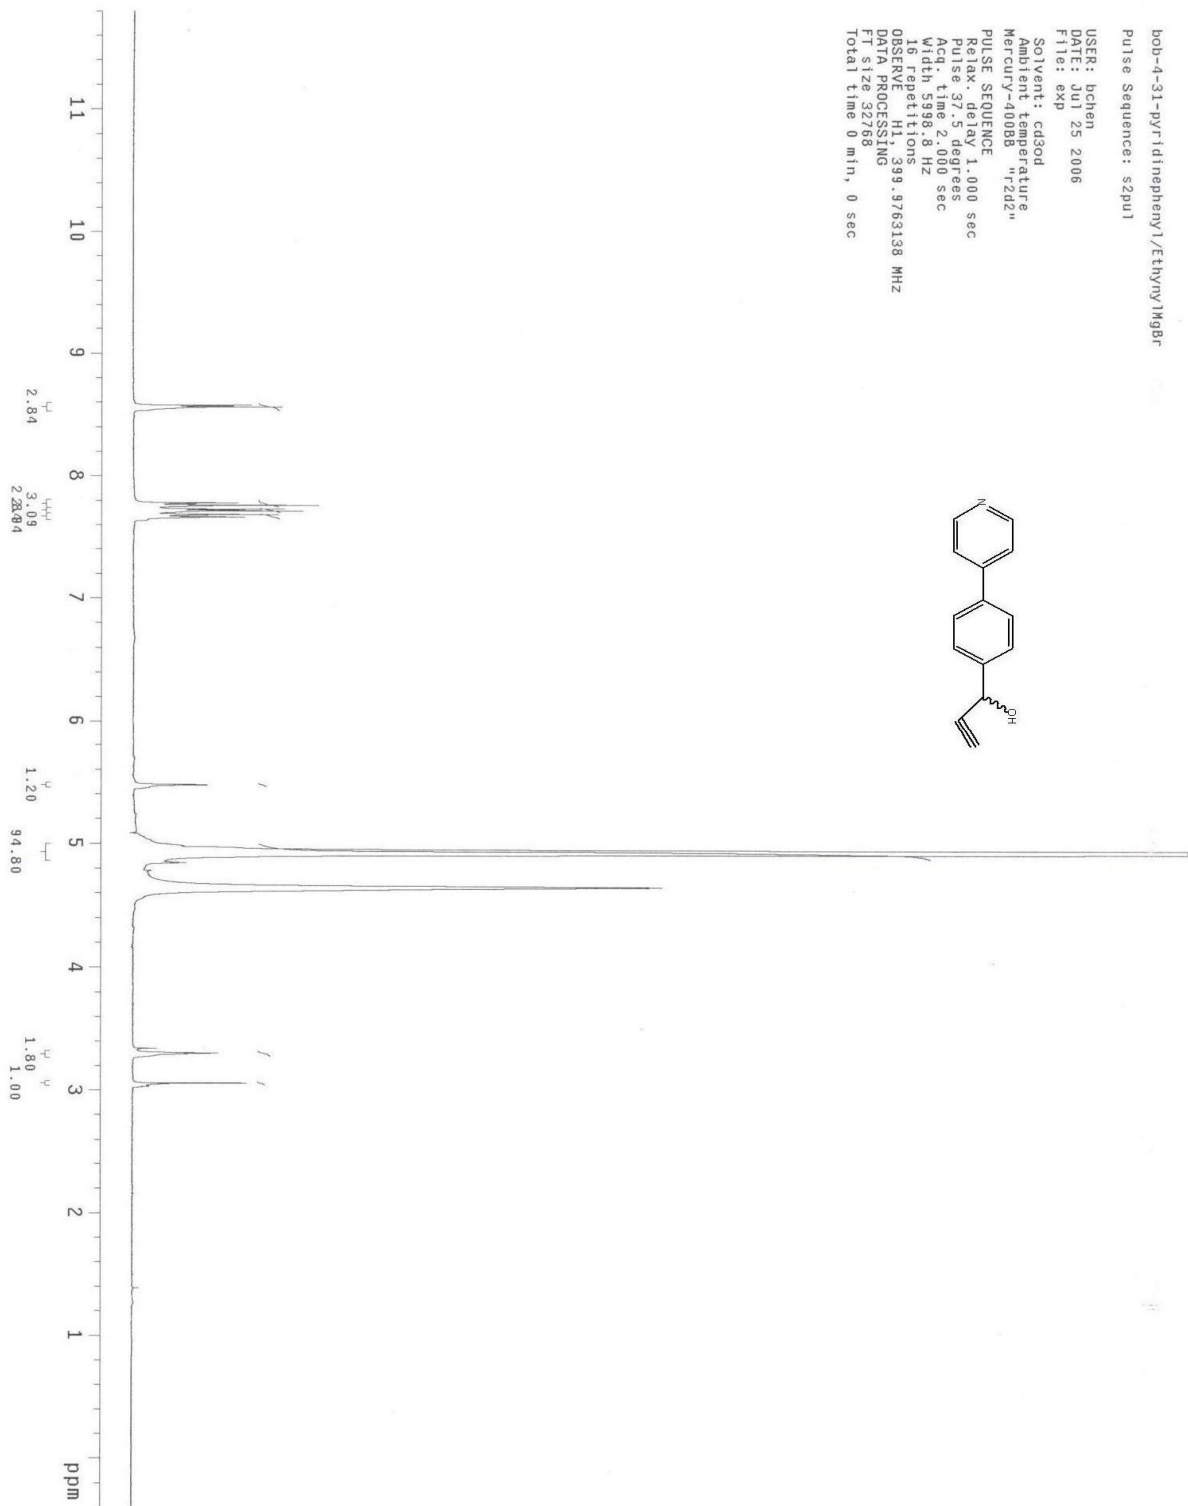

<sup>13</sup>C NMR of 8a:

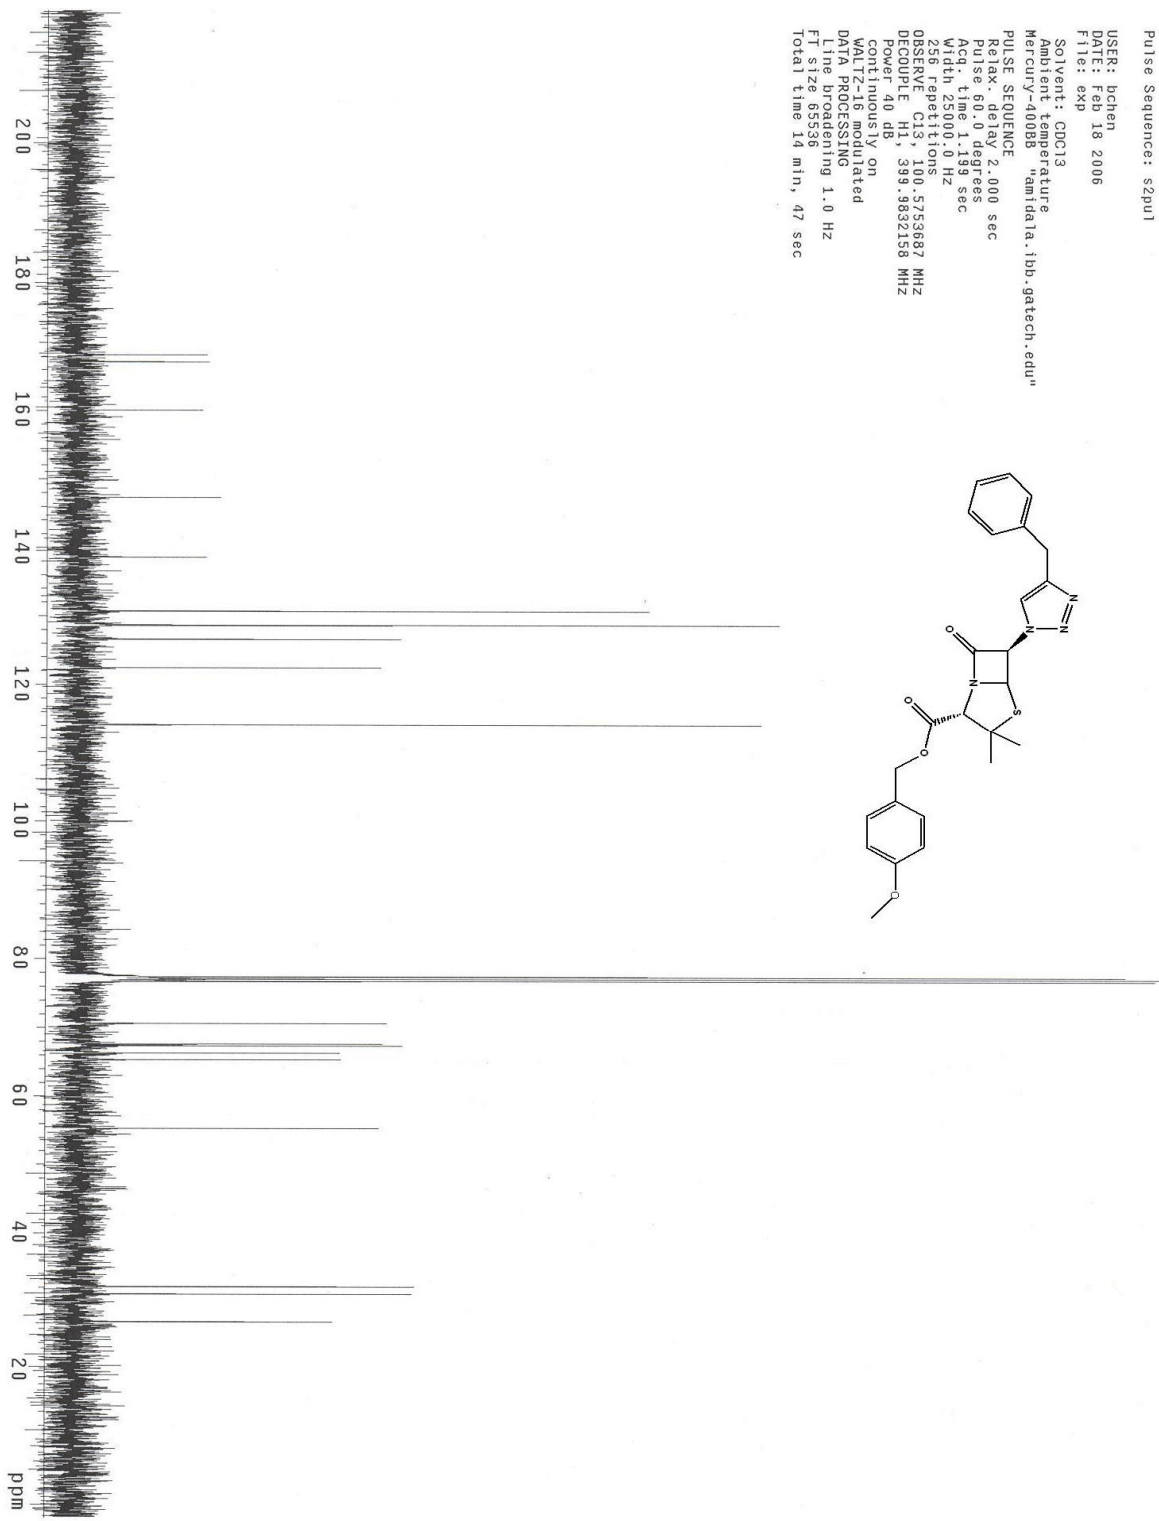

A0-001-045  
Pulse Sequence: s2pu1  
USER: bchen  
DATE: Feb 18 2006  
File: exp  
Solvent: CDCl3  
Ambient temperature  
Mercury-400BB "amidata.lib.gatech.edu"  
PULSE SEQUENCE  
Relax: delay 2.000 sec  
Pulse: 60.0 degrees  
Acq: time 1.139 sec  
Vd: 120.0 Hz  
256 repetitions  
OBSERVE C13, 100.5753682 MHz  
DECUPLE H1, 399.9832158 MHz  
Power: 40 dB  
Continuously on  
WALTZ-16 modulated  
DATA PROCESSING  
Line broadening 1.0 Hz  
FT size 65536  
Total time 14 min, 47 sec

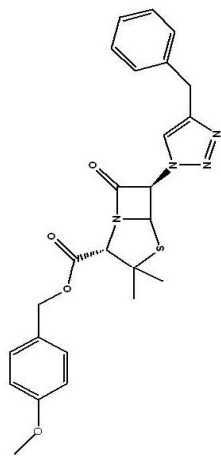

<sup>1</sup>H NMR of 8a:

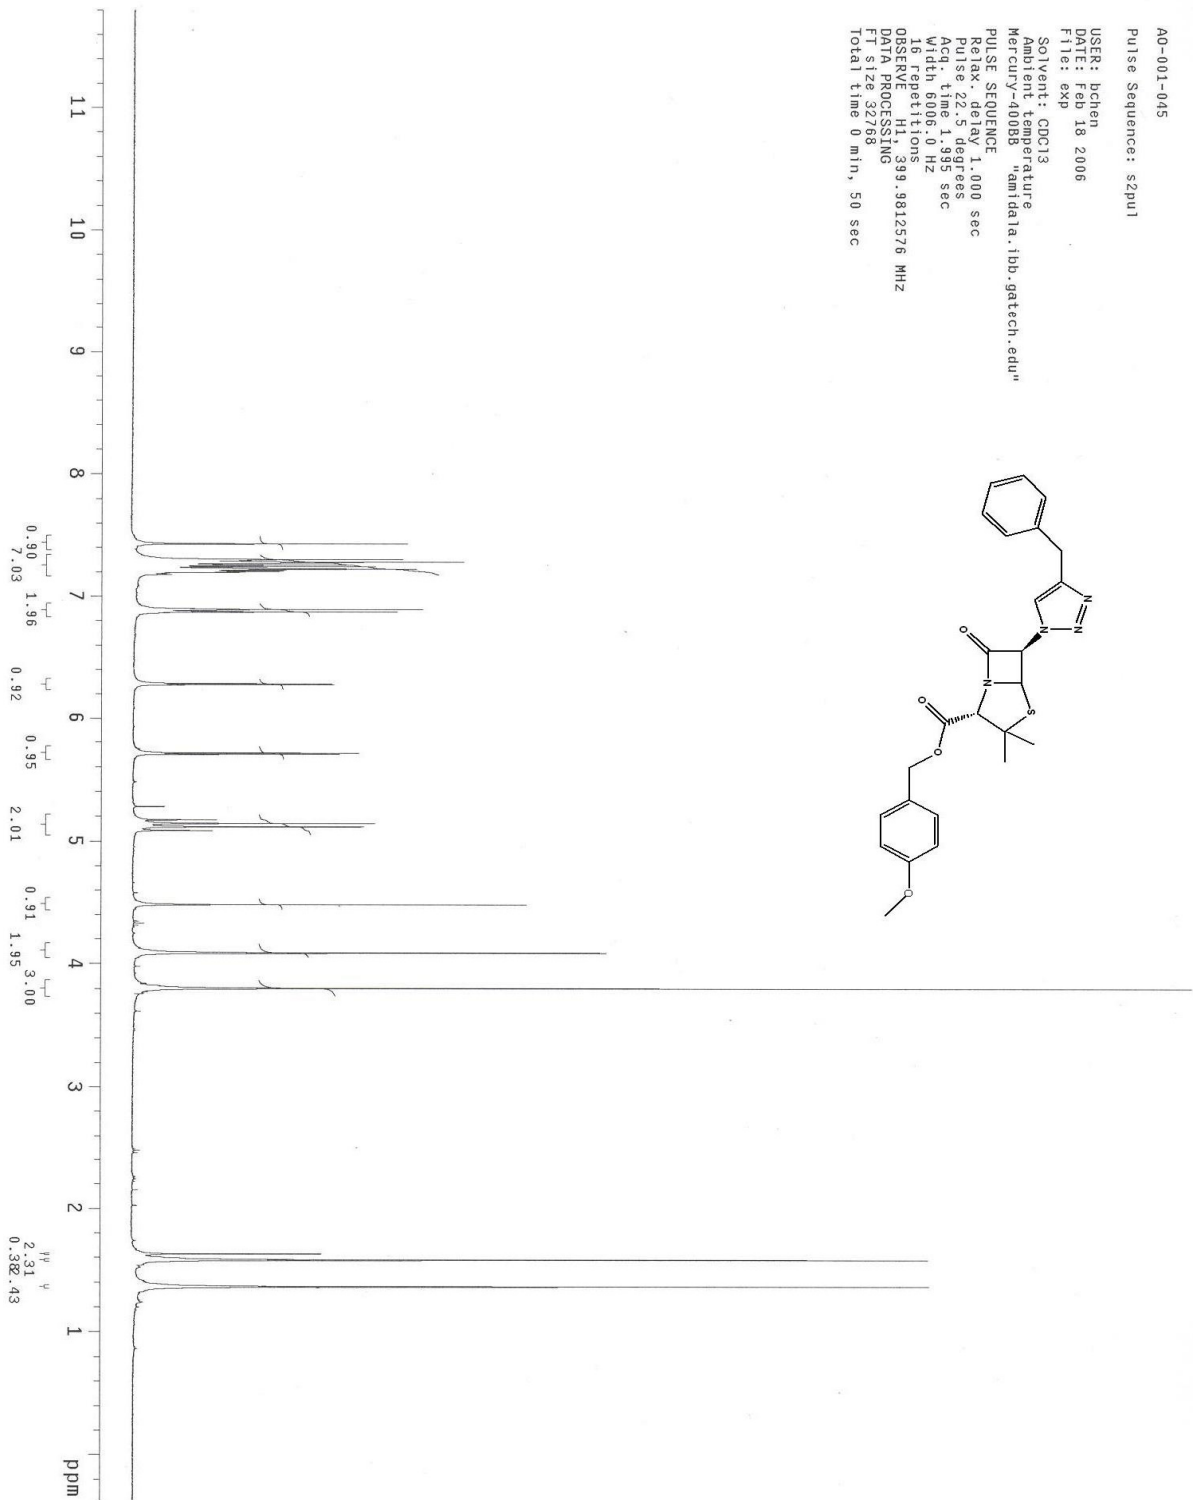

A0-001-045  
Pulse Sequence: szpu1  
USER: bchen  
DATE: Feb 18 2006  
File: exp  
Solvent: CDCl3  
Ambient Temperature  
Mercury-400BB "amidata.ibd.gatech.edu"  
PULSE SEQUENCE  
Pulse, delay 1.000 sec  
Relax, delay 1.000 sec  
Pulse, delay 1.000 sec  
Acq. time 1.935 sec  
Width 6006.0 Hz  
Nuclei 13C  
Observed 13C 99.9812576 MHz  
DATA PROCESSING  
FT size 32768  
Total time 0 min, 50 sec

<sup>13</sup>C NMR of 8b:

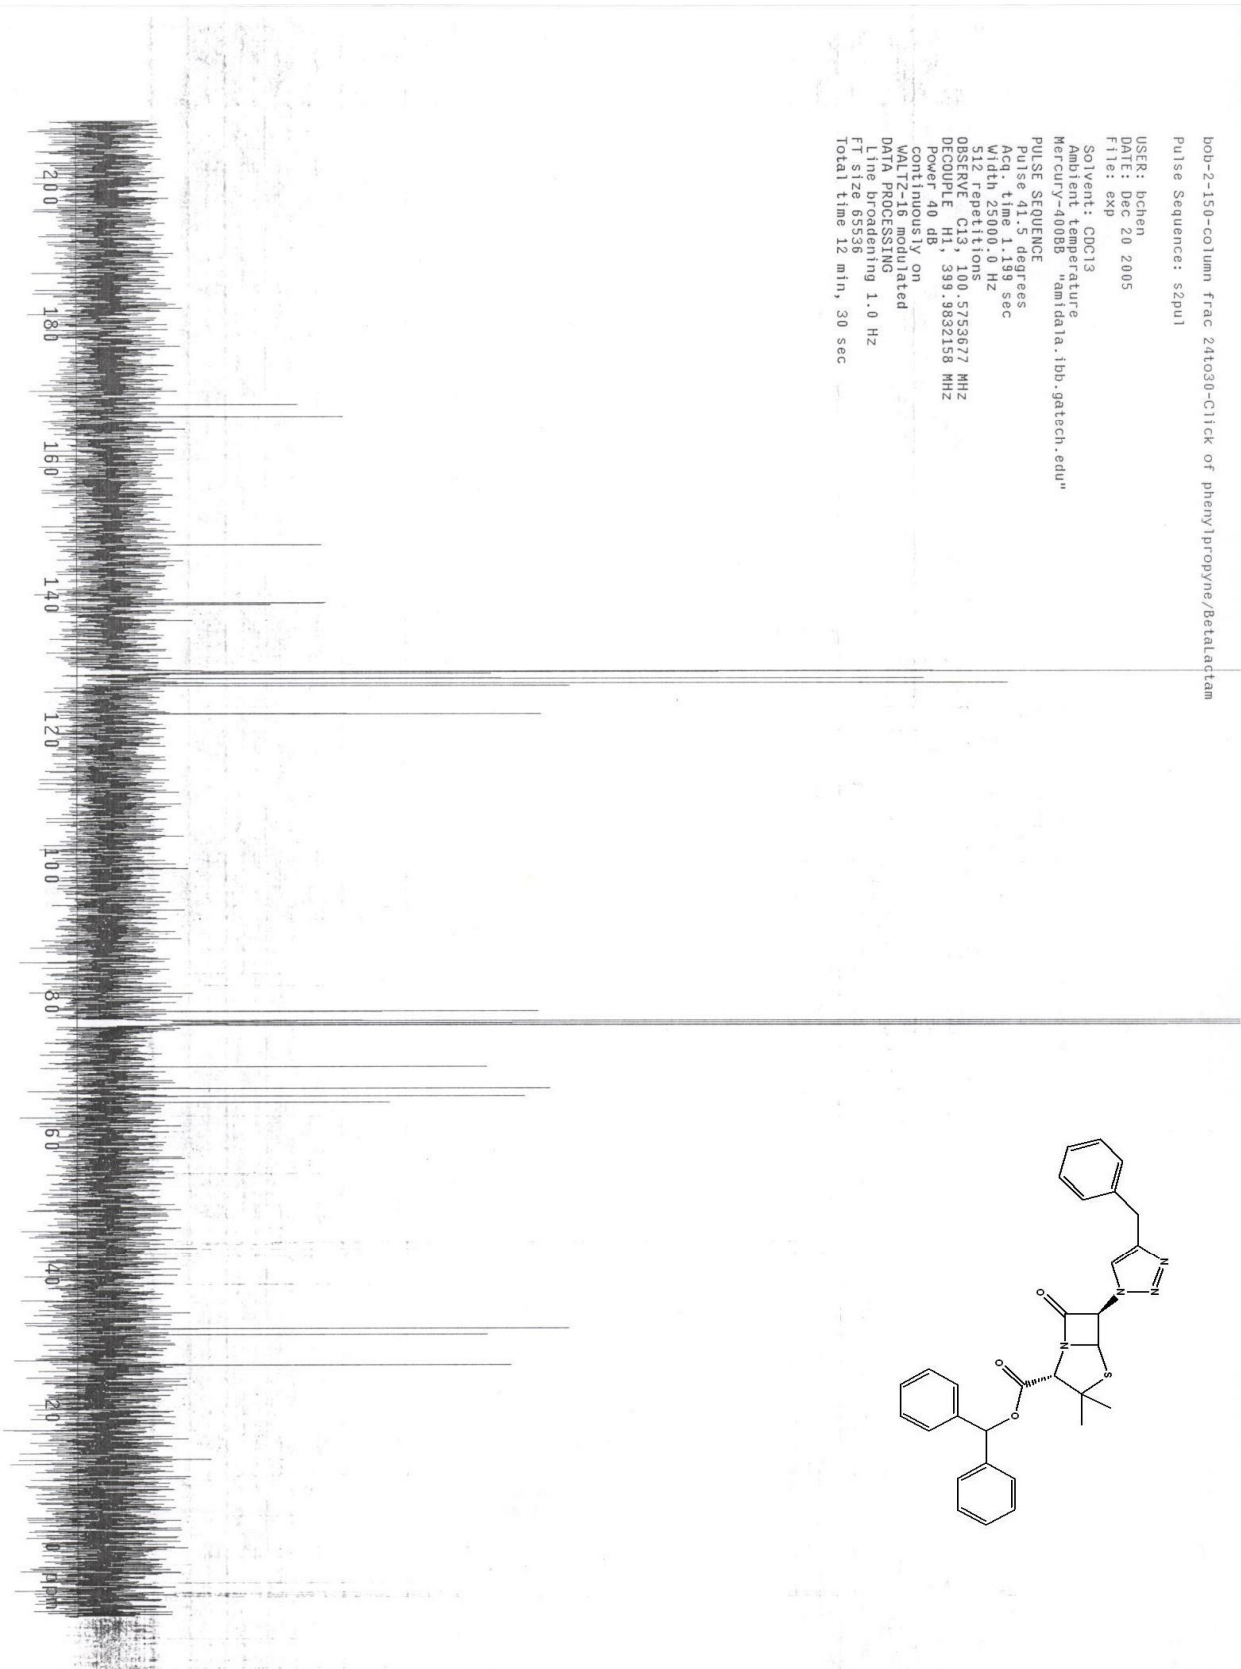

<sup>1</sup>H NMR of **8b**:

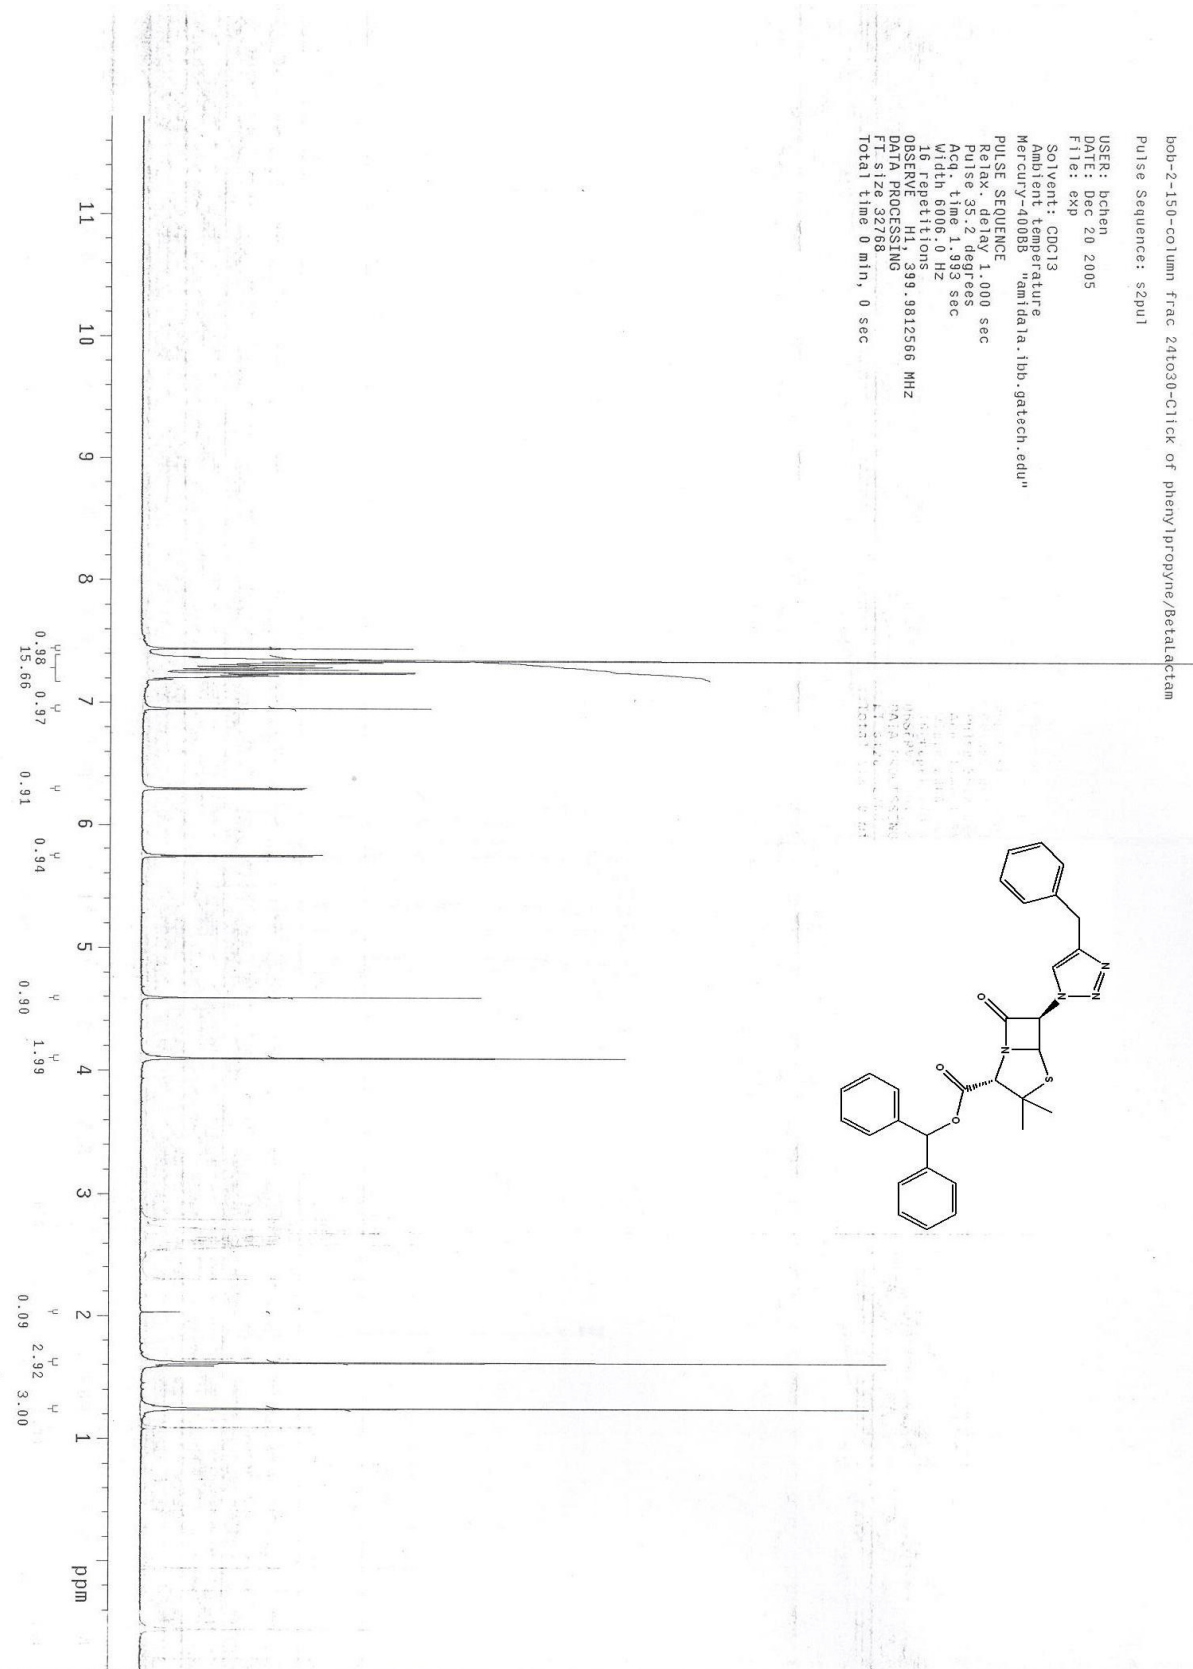

<sup>13</sup>C NMR of 8c:

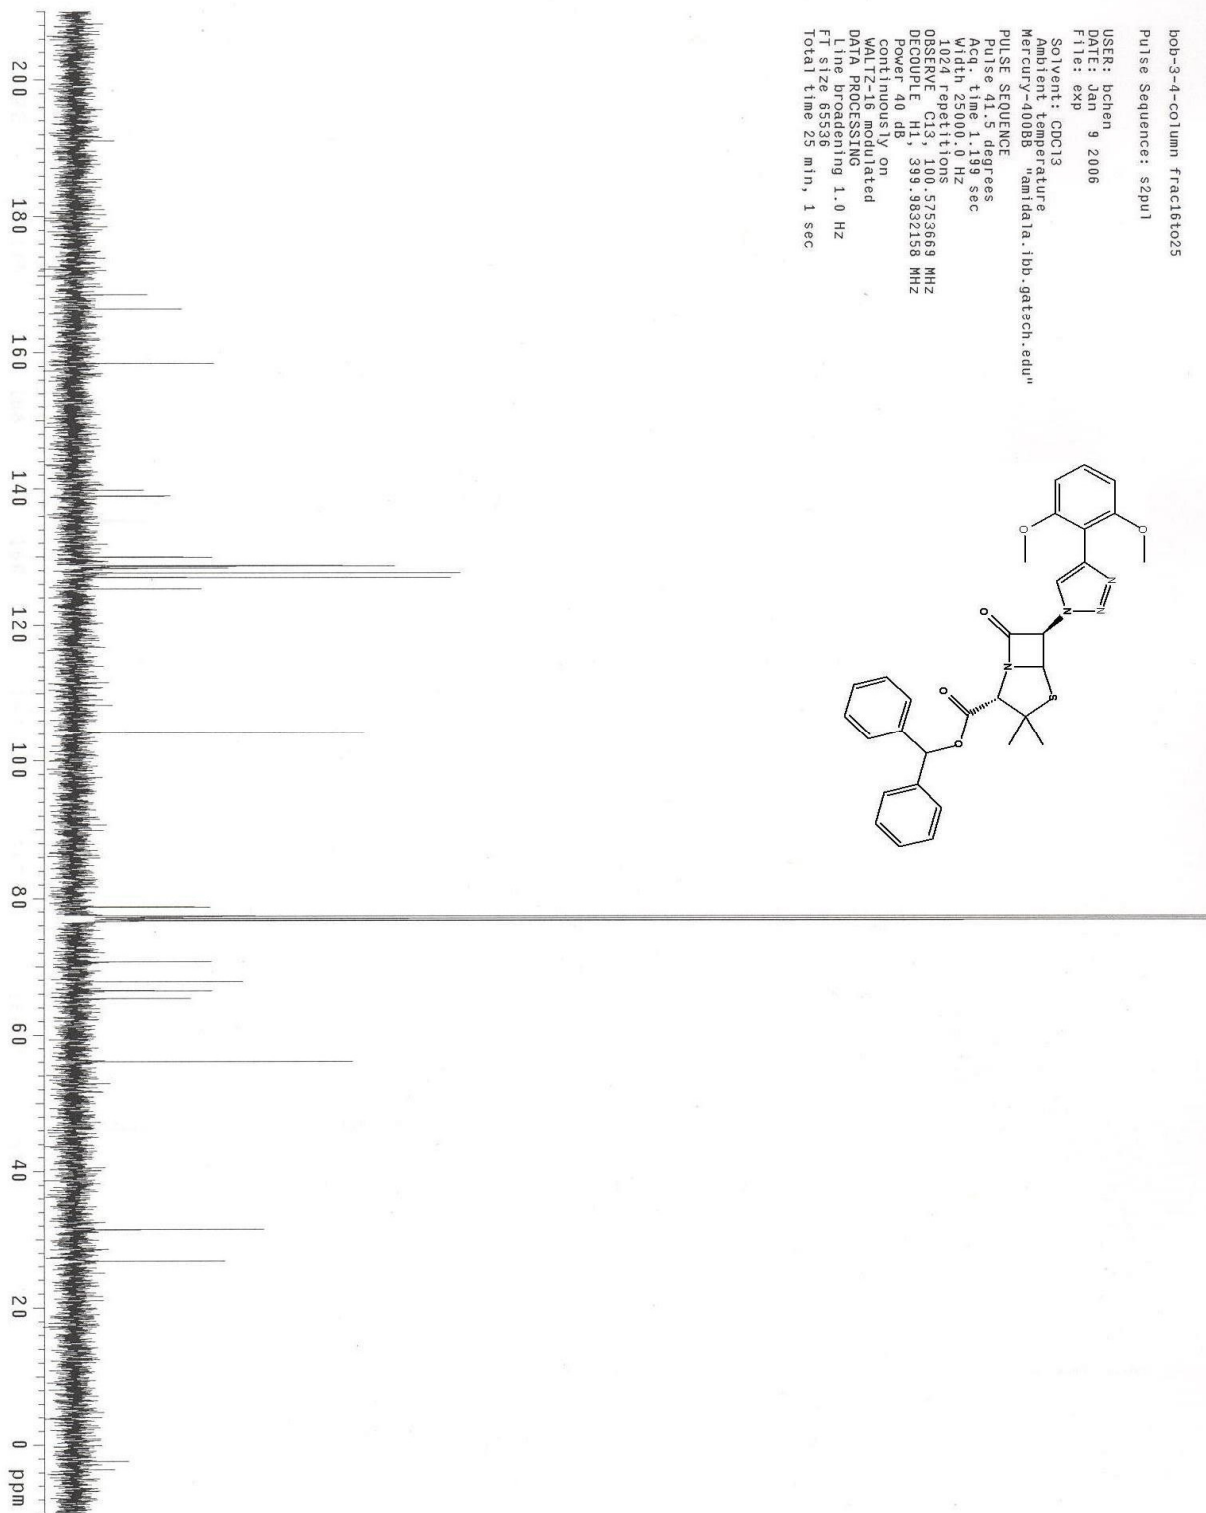



<sup>1</sup>H NMR of 8c:

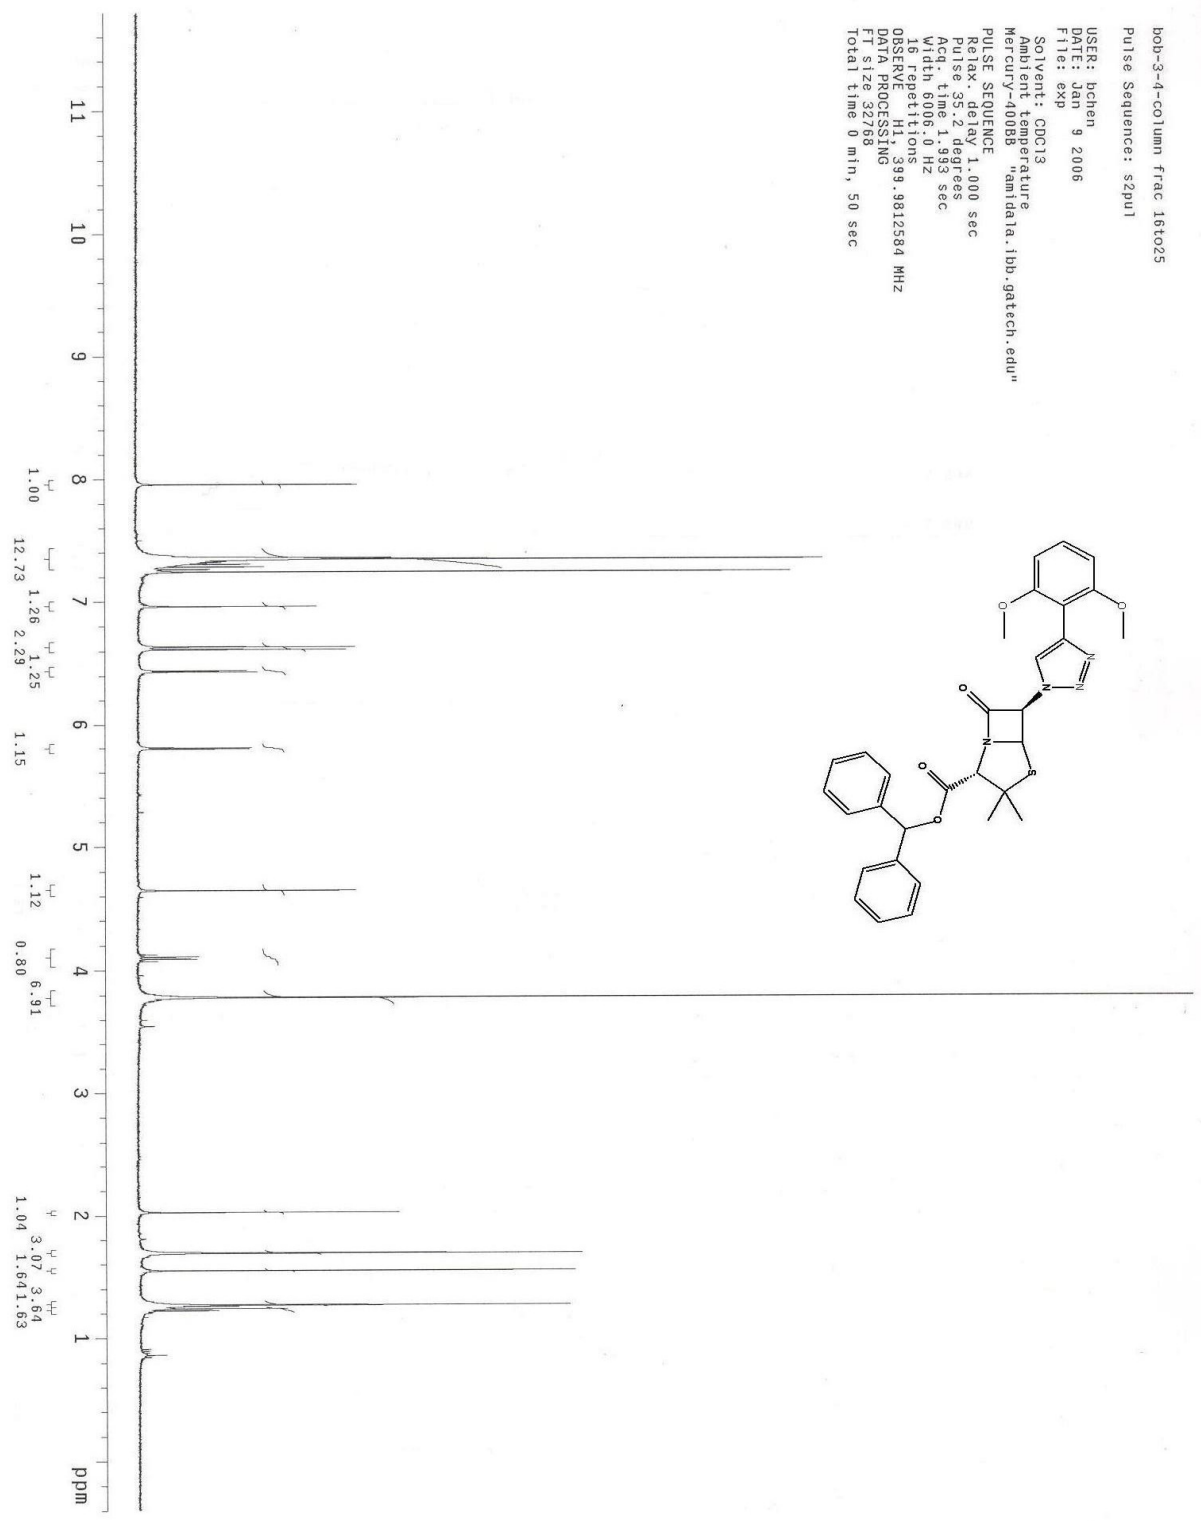

<sup>13</sup>C NMR of 9a:

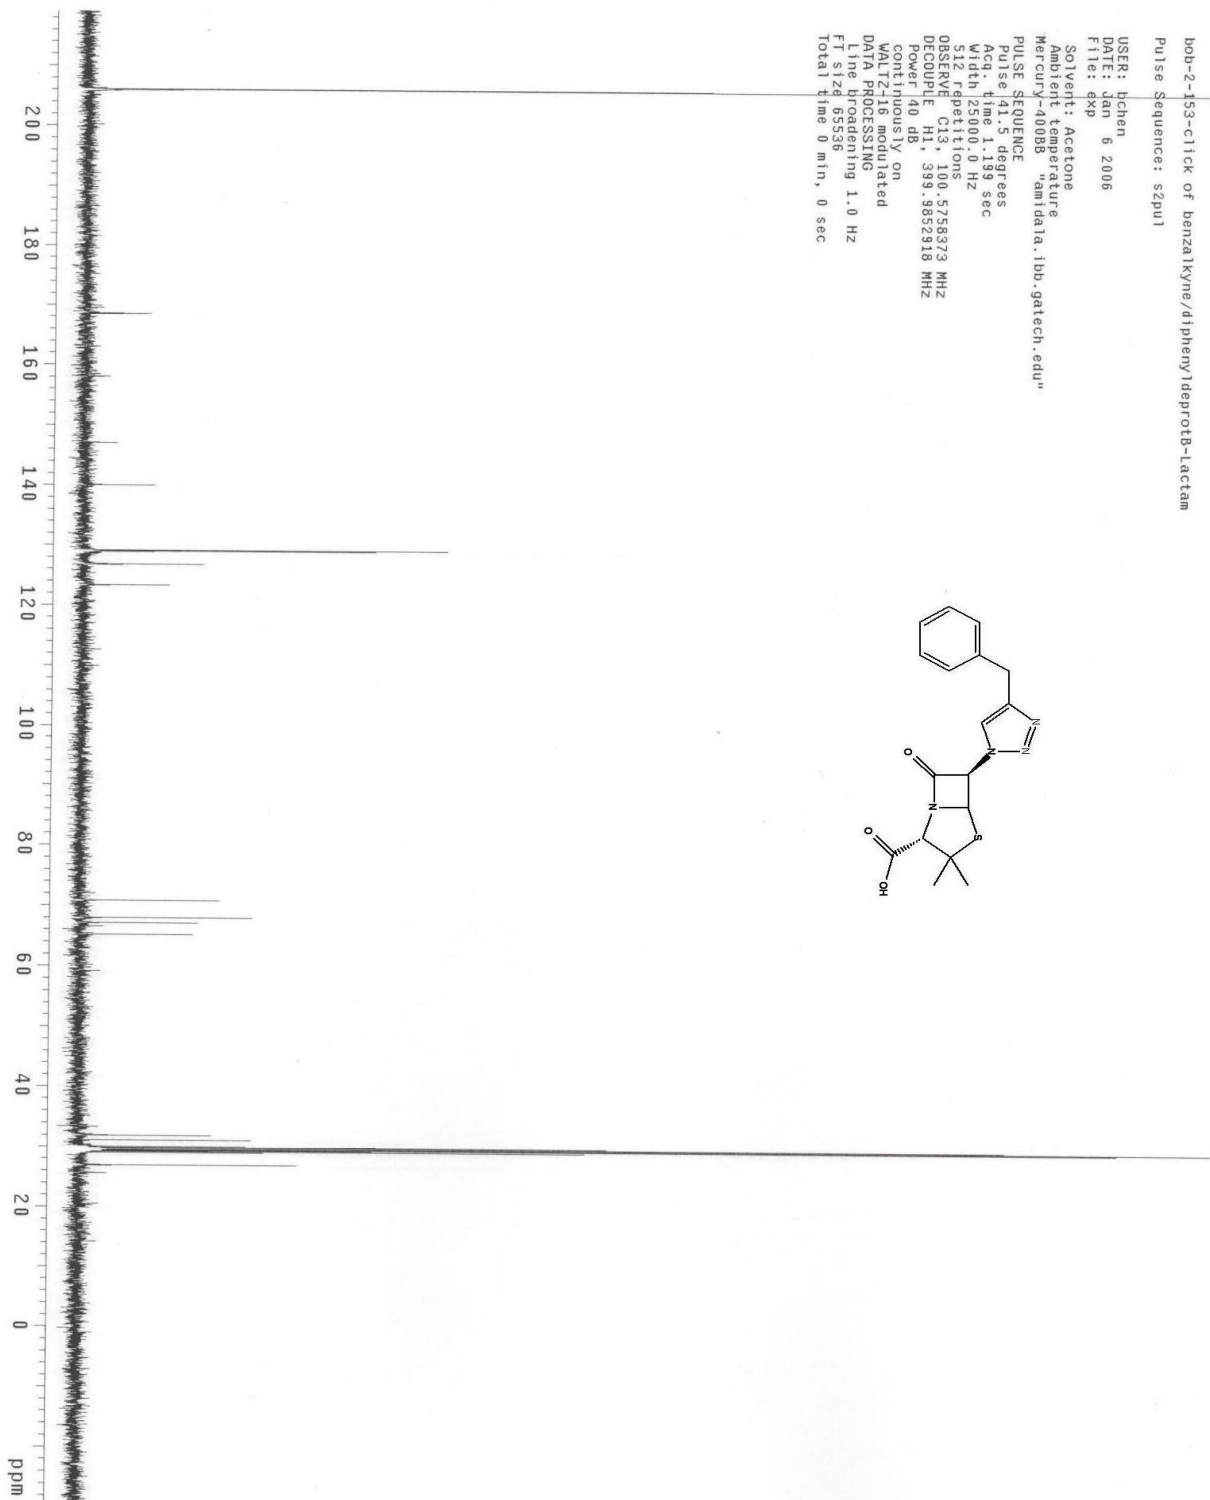

<sup>1</sup>H NMR of 9a:

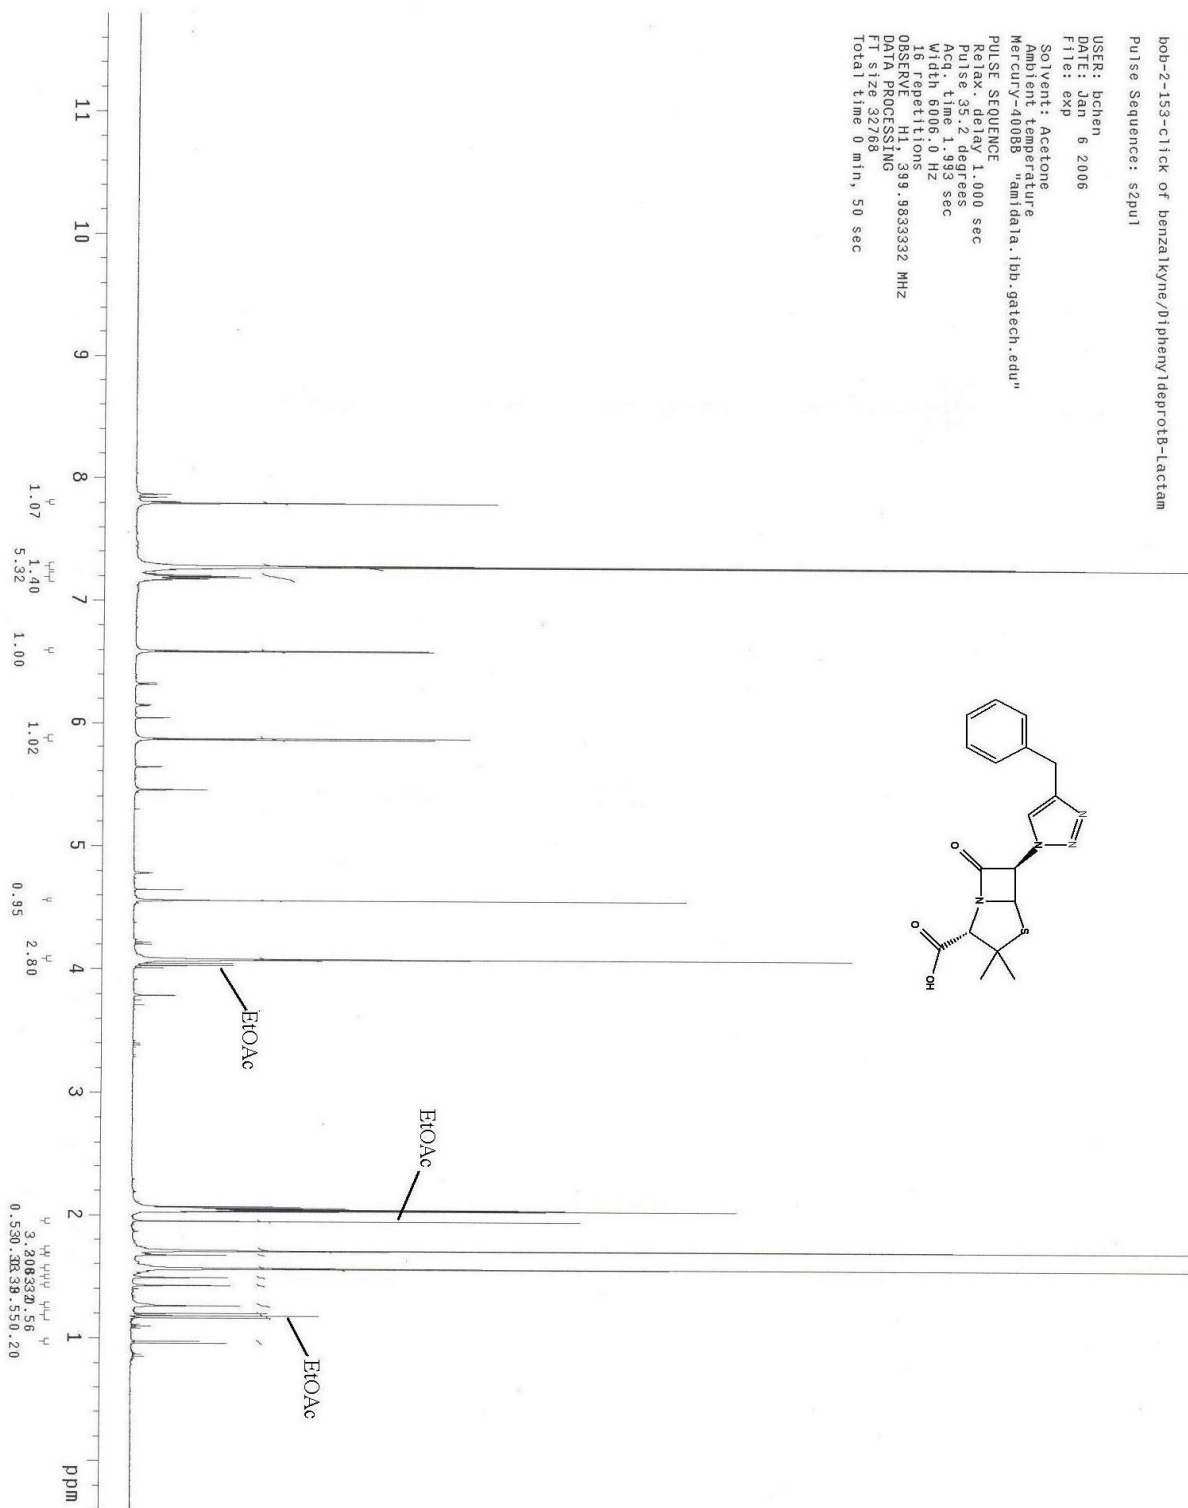

<sup>13</sup>C NMR of 9b:

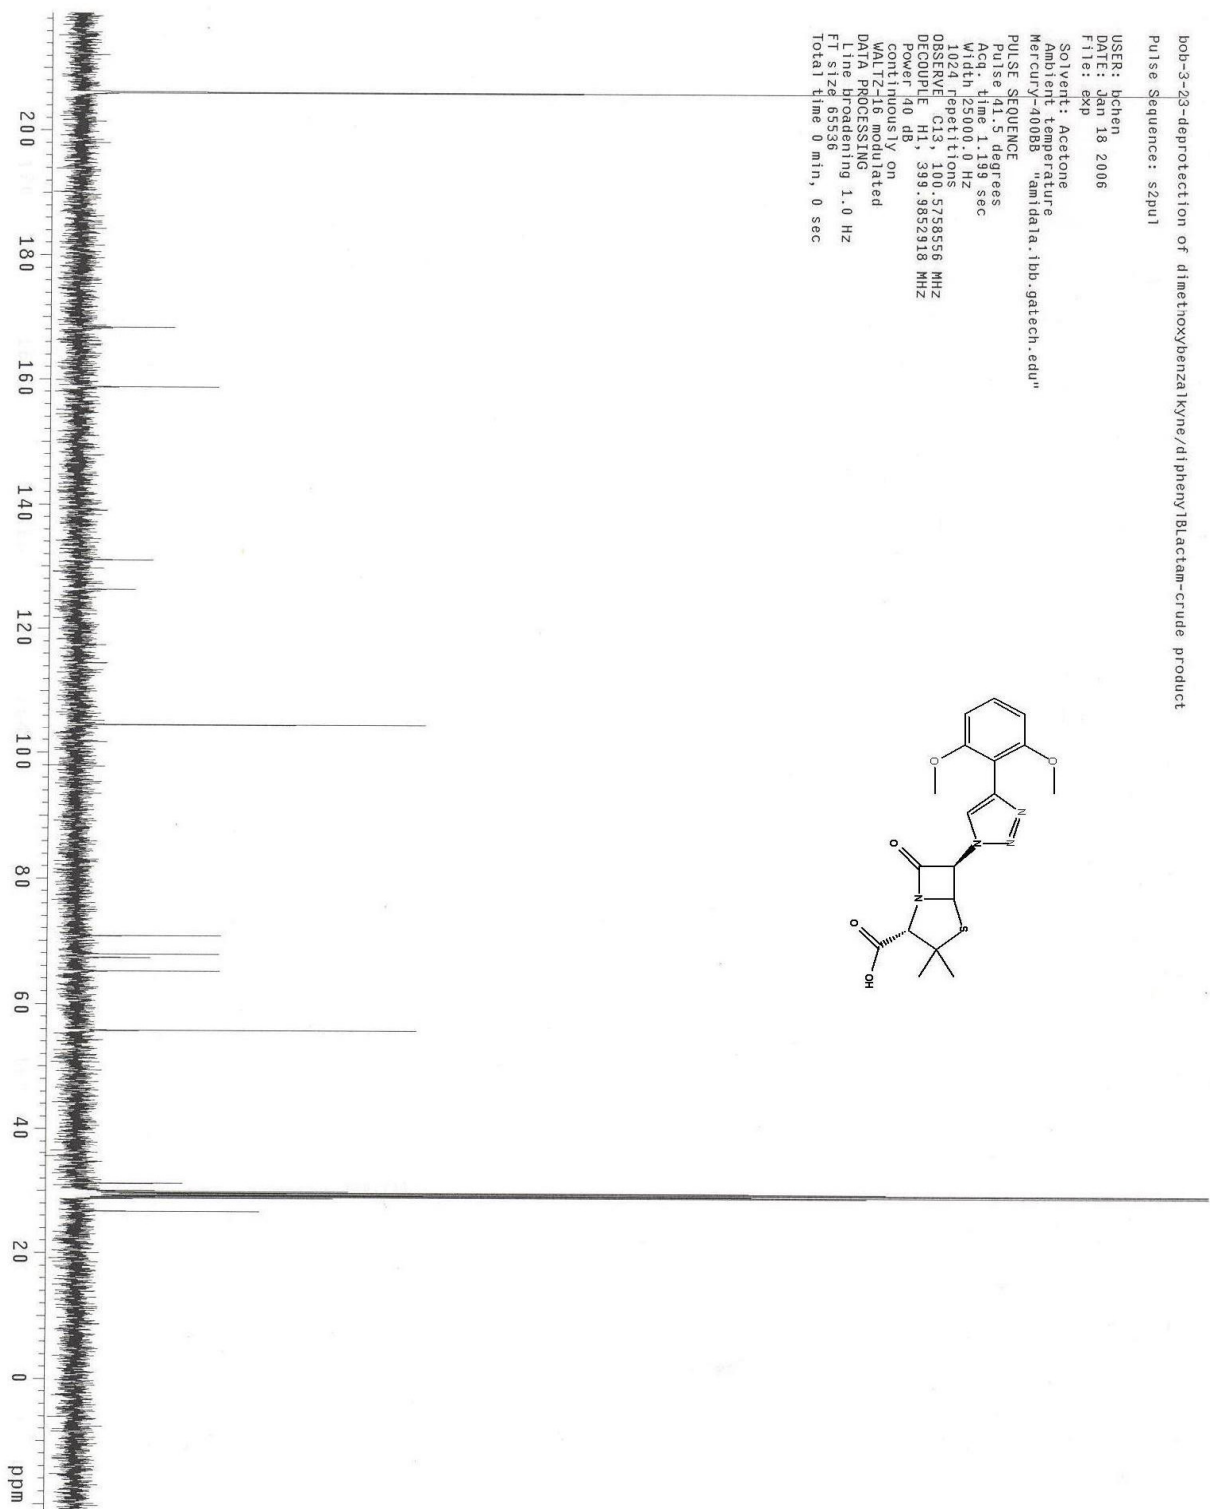

bob-3-23-deprotection of dimethoxybenzylkyne/diphenylLactam-crude product  
Pulse Sequence: s2pu1

USER: bchen  
DATE: Jan 18 2006  
File: exp  
Solvent: Acetone  
Ambient temperature  
Mercury-400B8 "amidata.lpb.gatech.edu"  
PULSE SEQUENCE  
Relax. delay 1.000 sec  
Pulse 35.2 degrees  
Acq. time 1.993 sec  
Width 6006.0 Hz  
16 repetitions  
OBSERVE H1, 399.9833310 MHz  
DATA PROCESSING  
F1 size 32768  
Total time 0 min, 0 sec

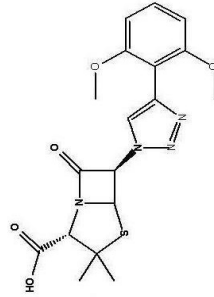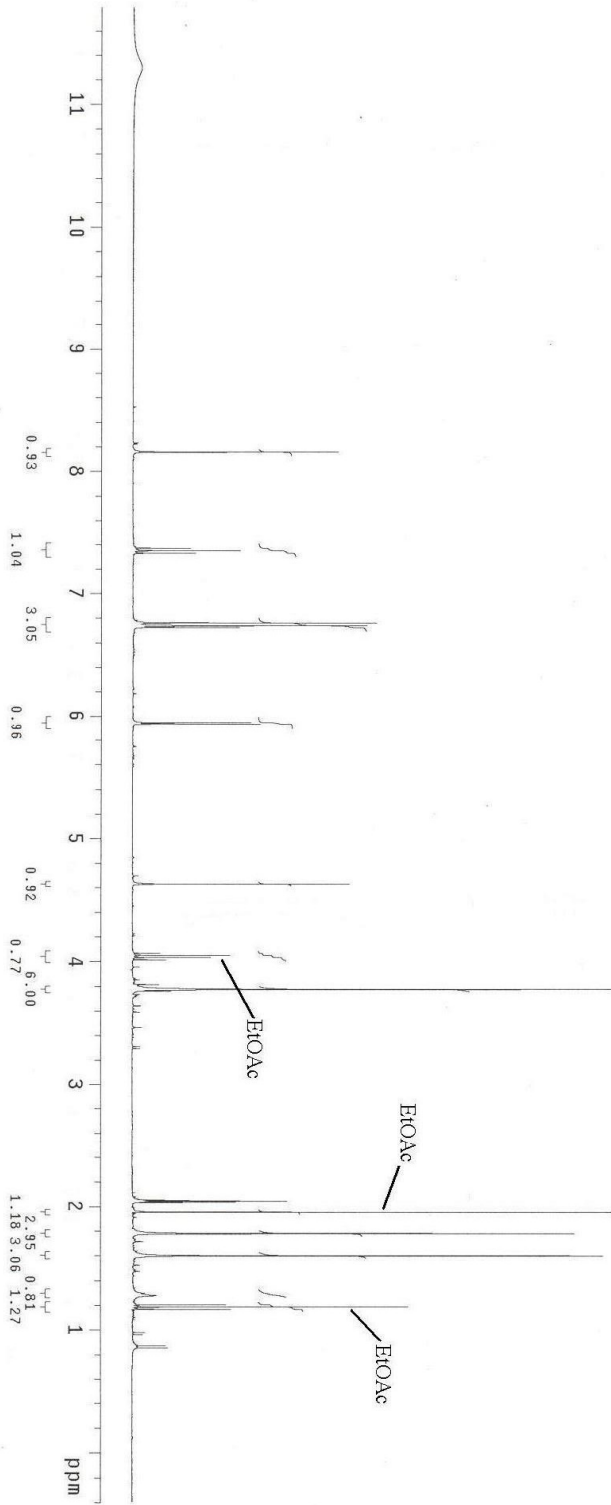

<sup>1</sup>H NMR of **9b**:

<sup>13</sup>C NMR of 11a:

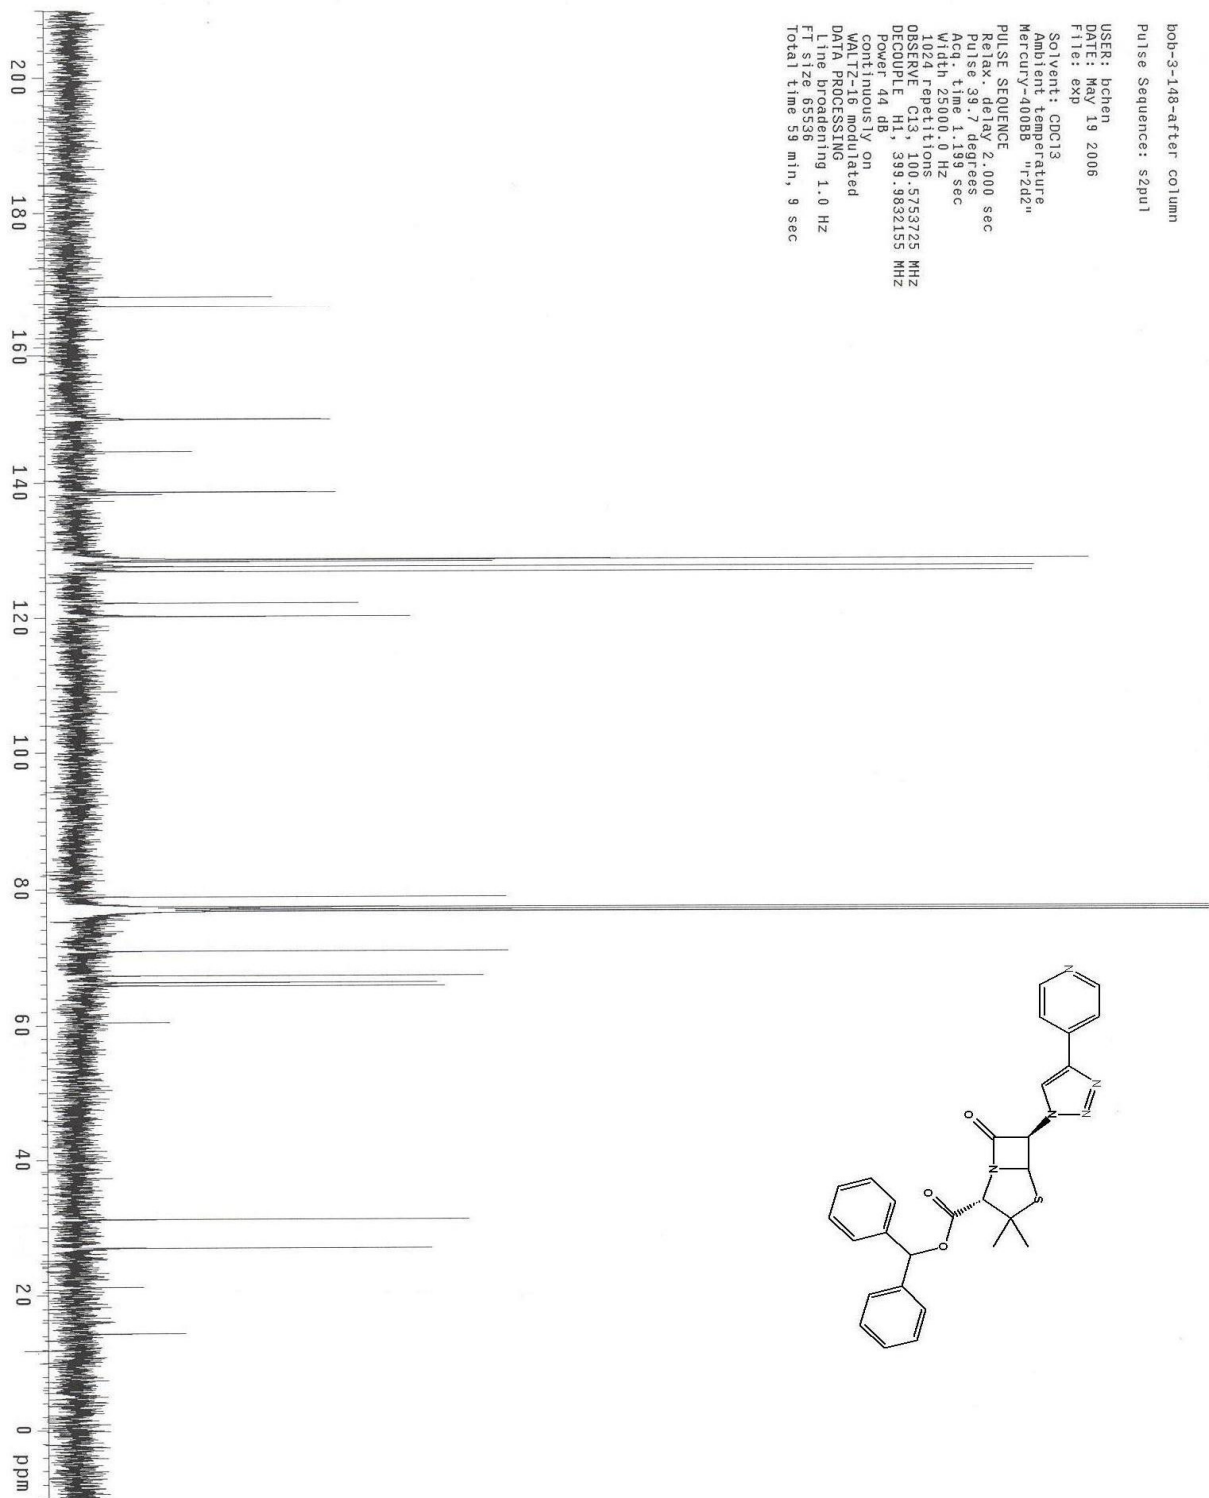

<sup>1</sup>H NMR of 11a:

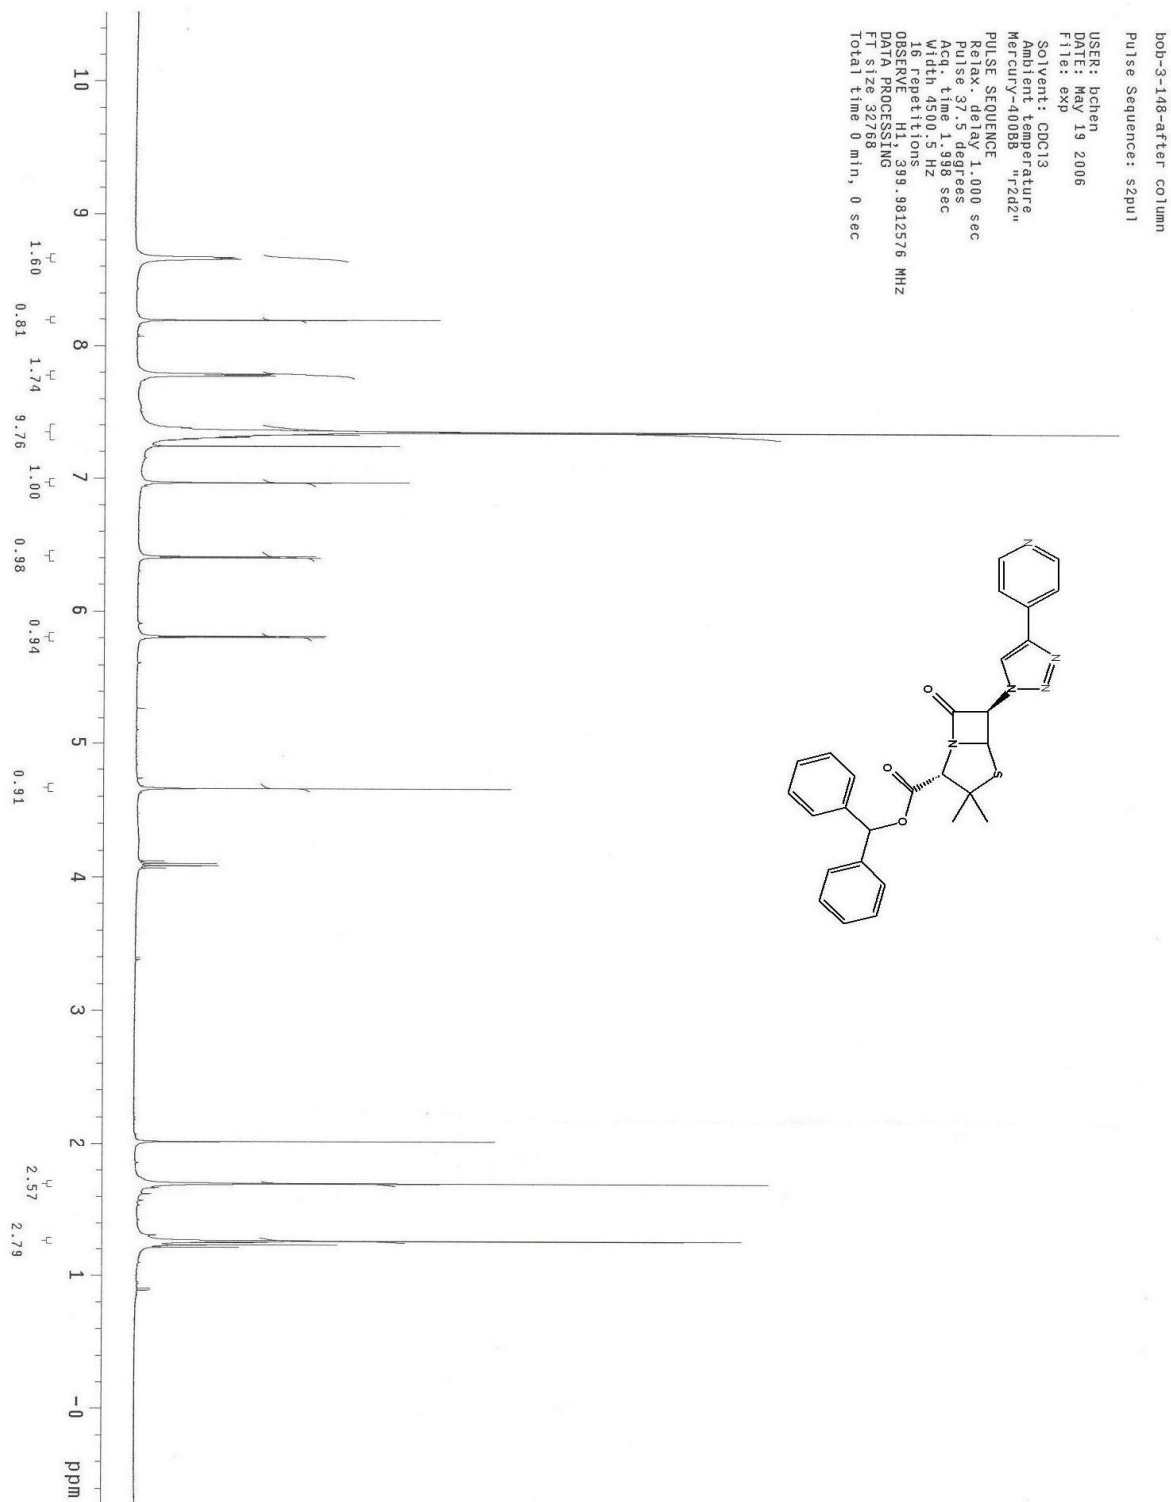

<sup>13</sup>C NMR of 11b:

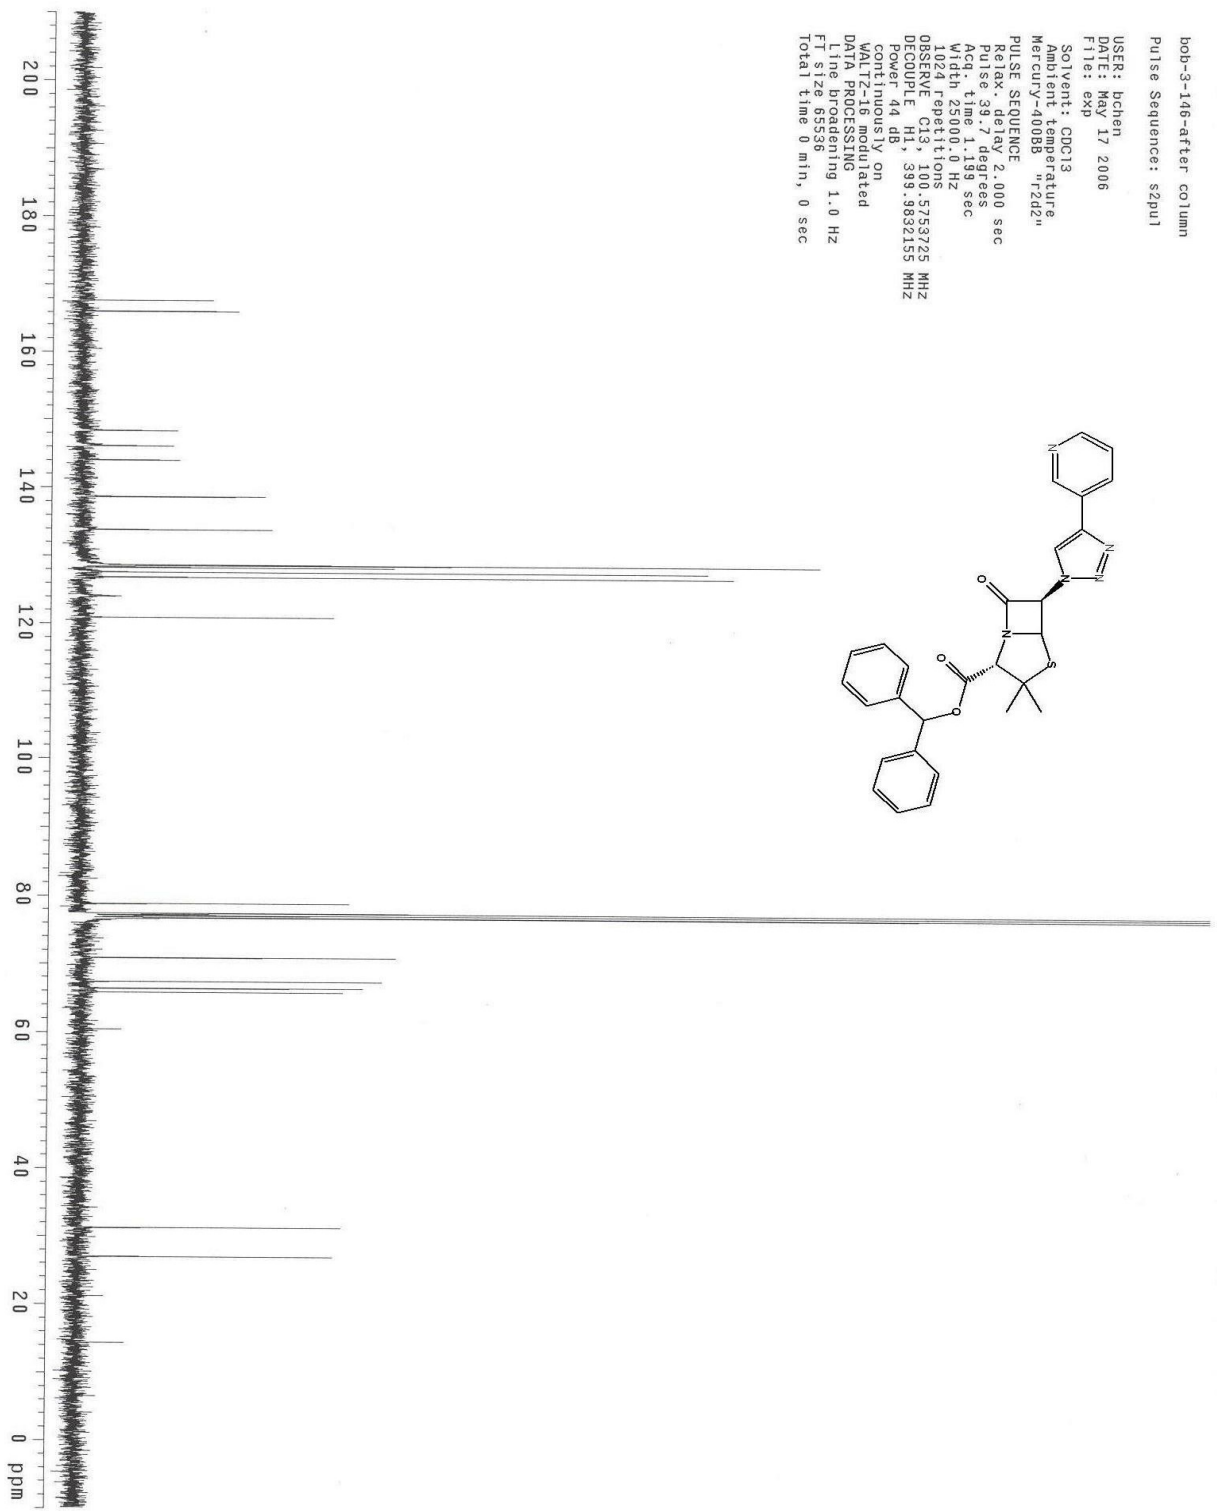



<sup>1</sup>H NMR of **11b**:

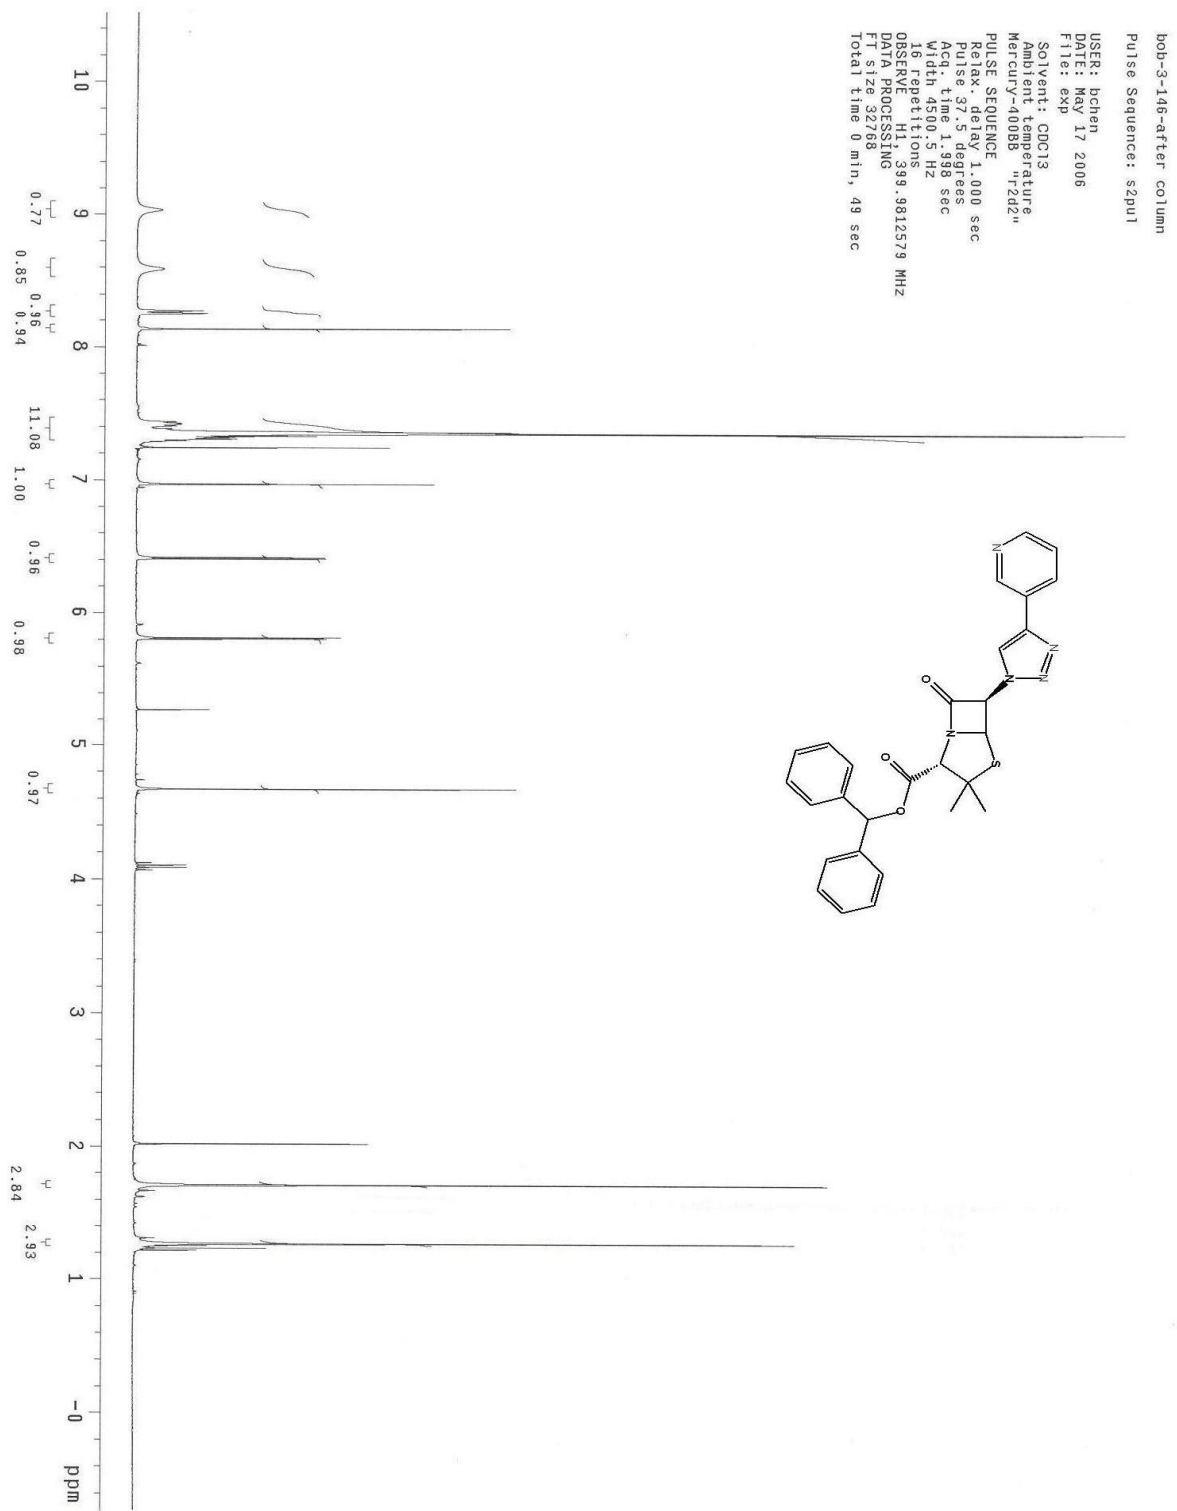

<sup>13</sup>C NMR of 11c:

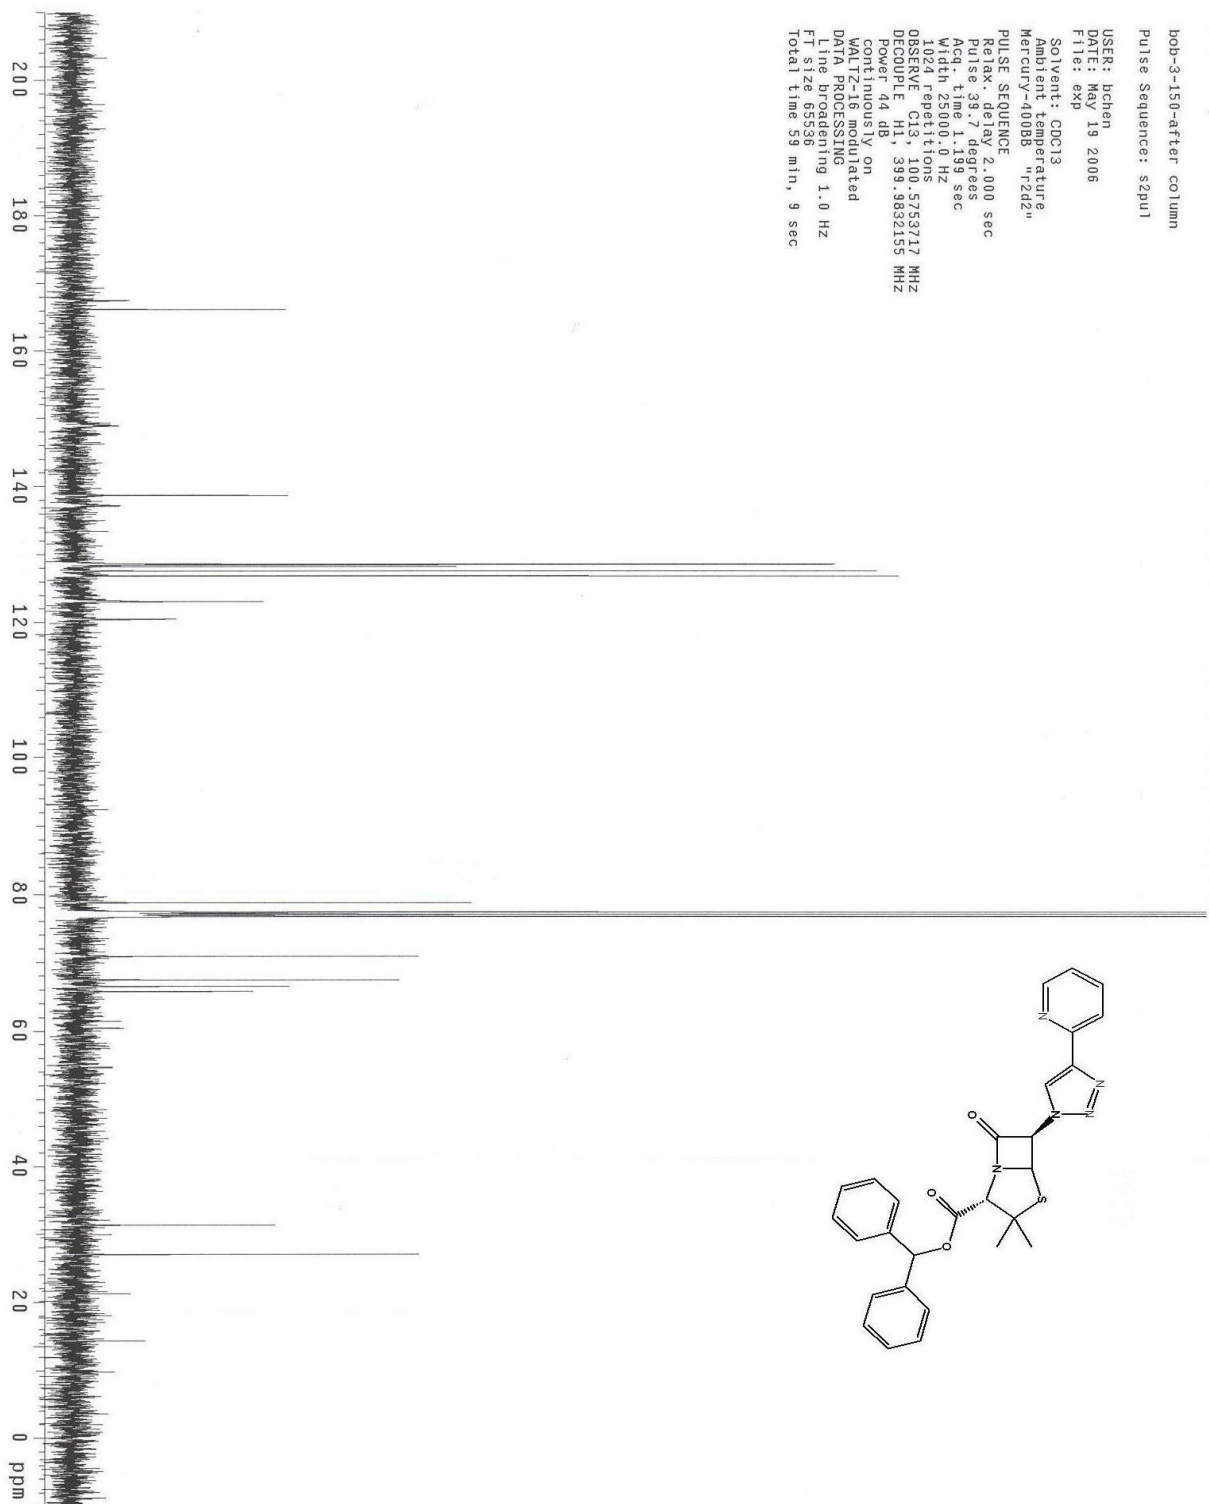

<sup>1</sup>H NMR of 11c:

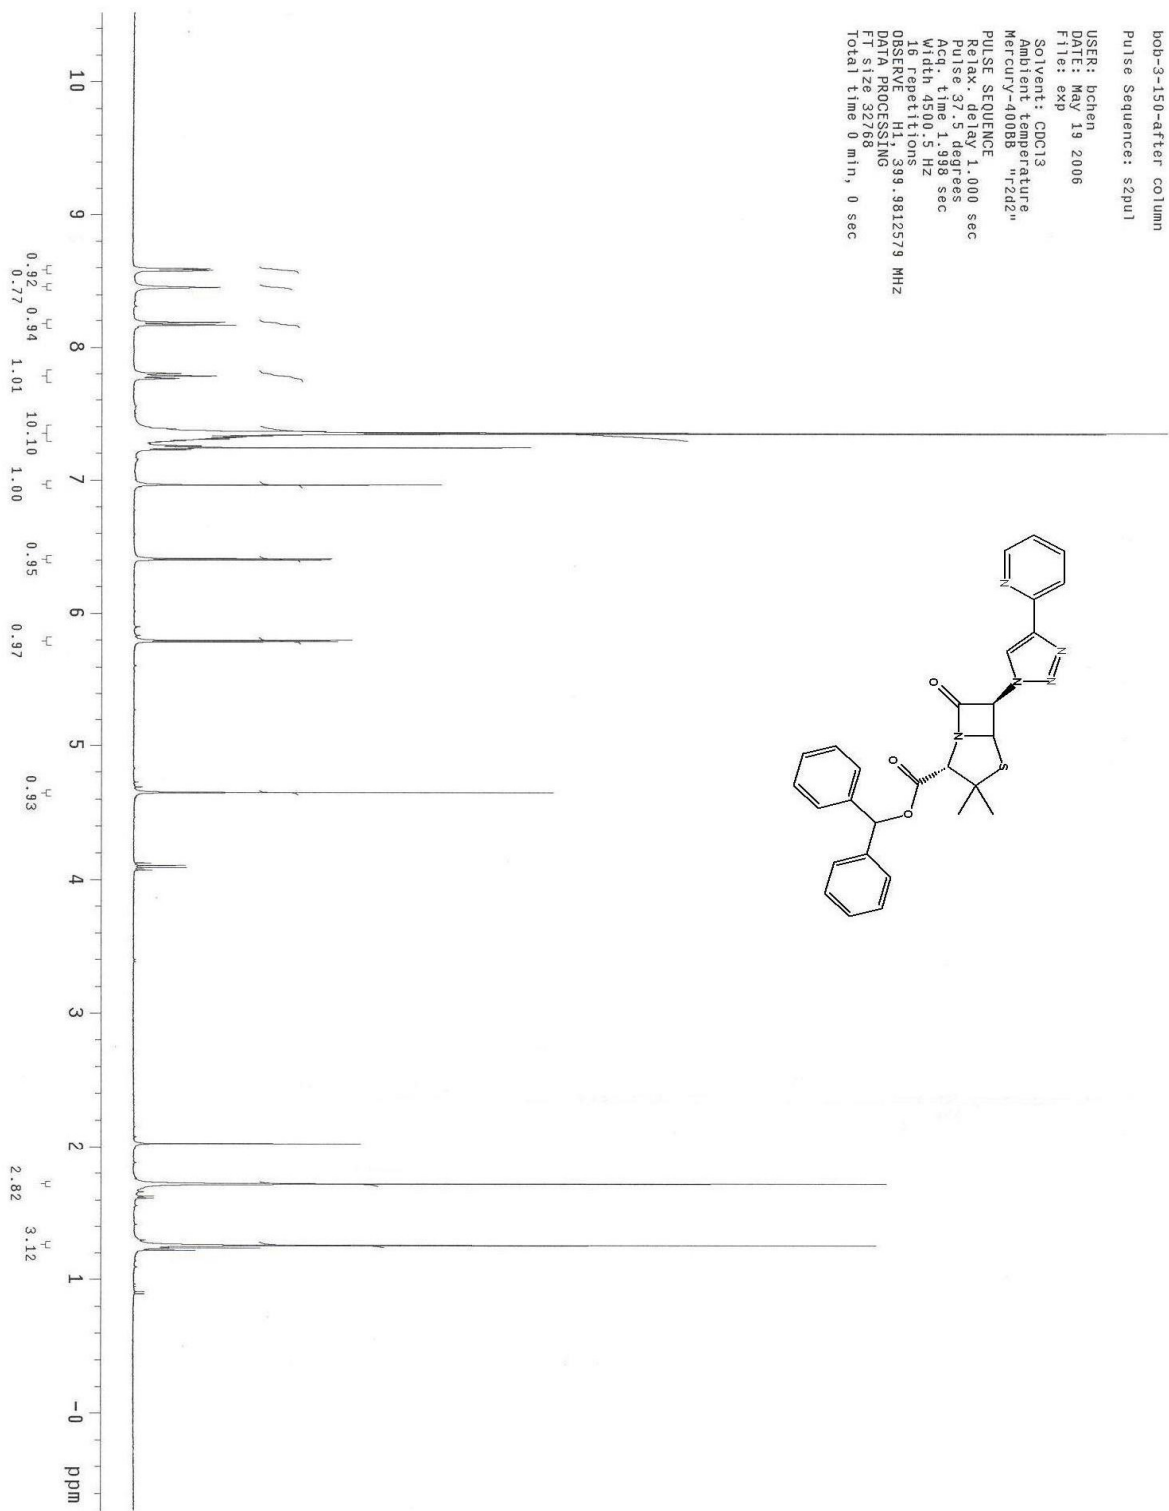

bob-3-150-after column  
Pulse Sequence: s2pul  
USER: bchen  
DATE: May 19 2006  
File: exp  
Solvent: CDCl3  
Ambient temperature  
Mercury-400BB "r2d2"  
PULSE SEQUENCE  
Rf1sk: 491.84 1.000 sec  
Pulse: 37.5 degrees  
Acq time: 1.998 sec  
Width: 4500.5 Hz  
16 repetitions  
OBSERVE: H1, 399.9812579 MHz  
DATA PROCESSING  
FT size: 32768  
Total time: 0 min, 0 sec

<sup>13</sup>C NMR of 11d:

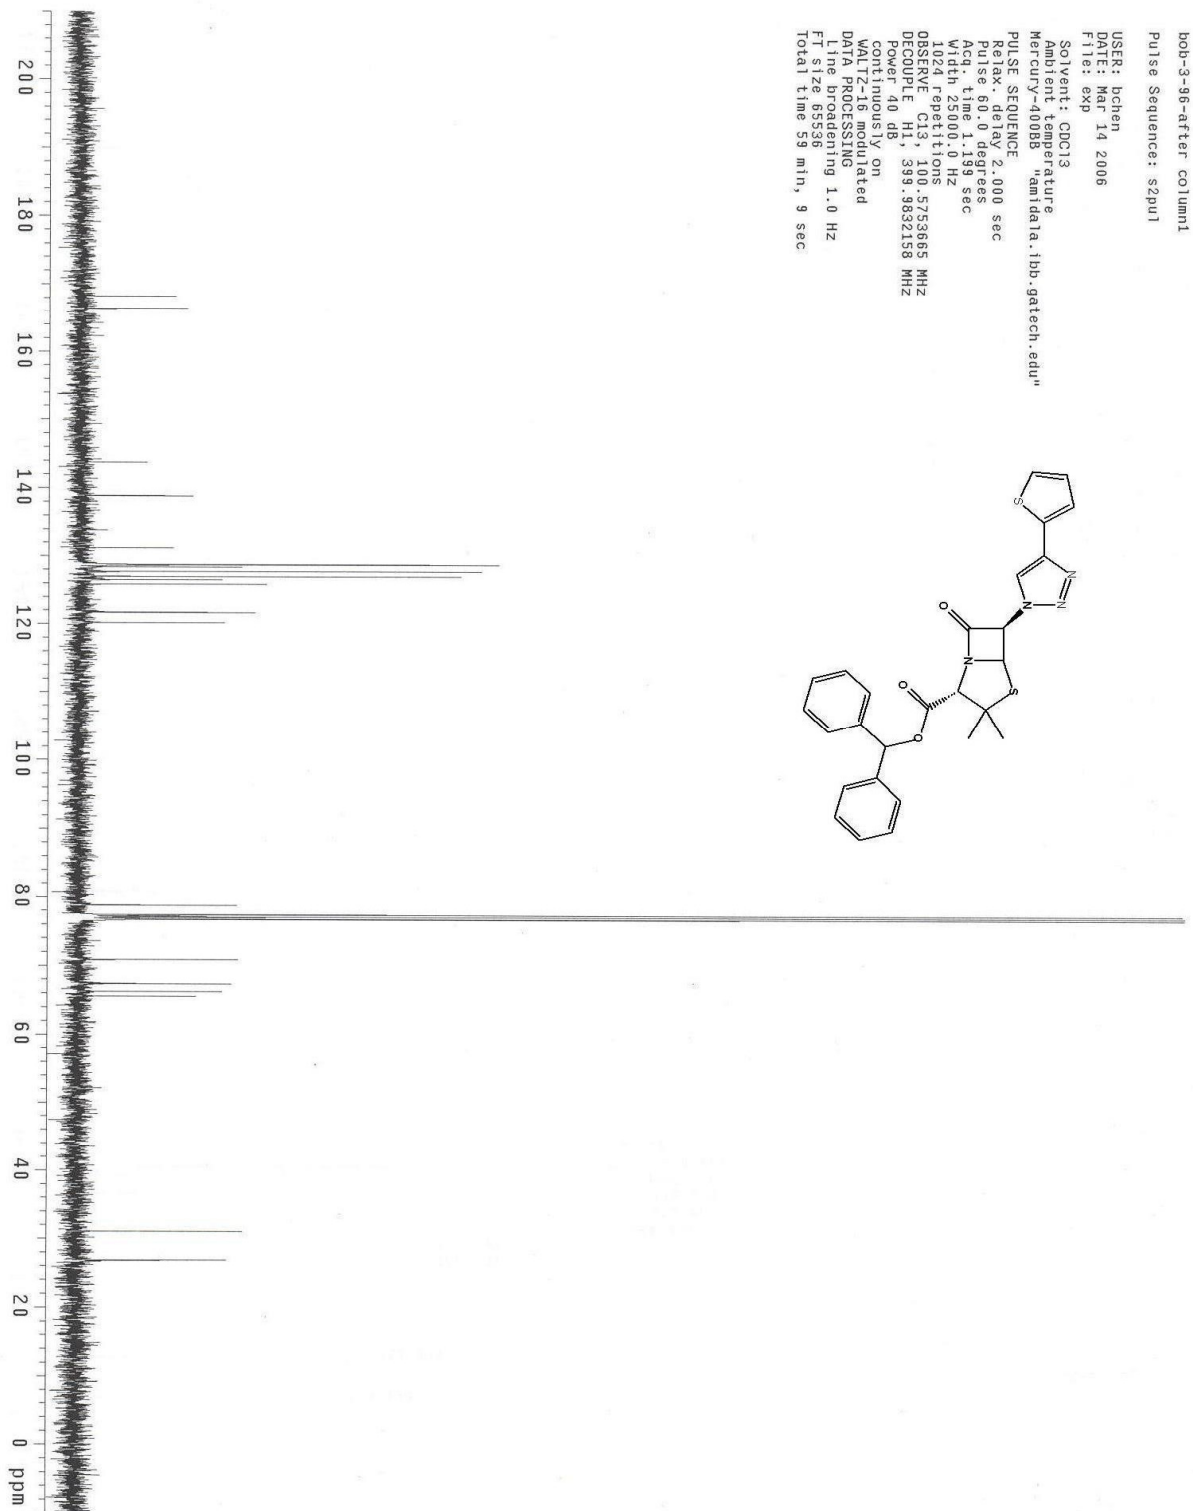

<sup>1</sup>H NMR of 11d:

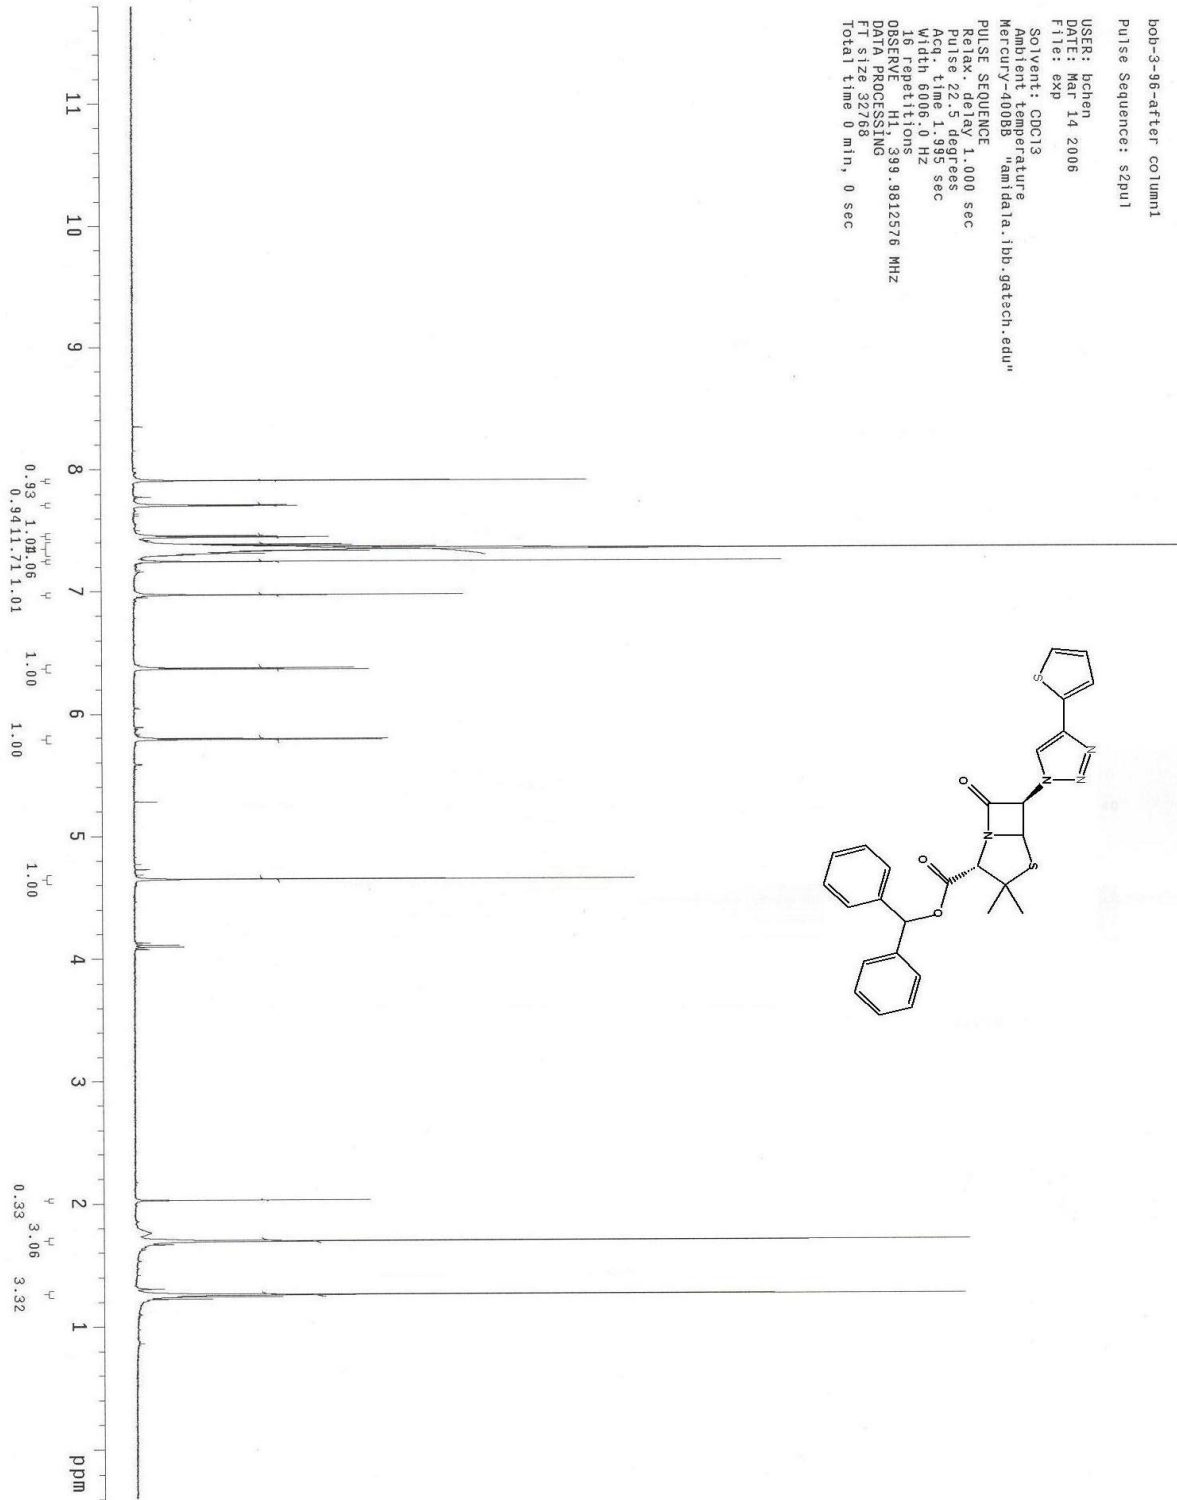

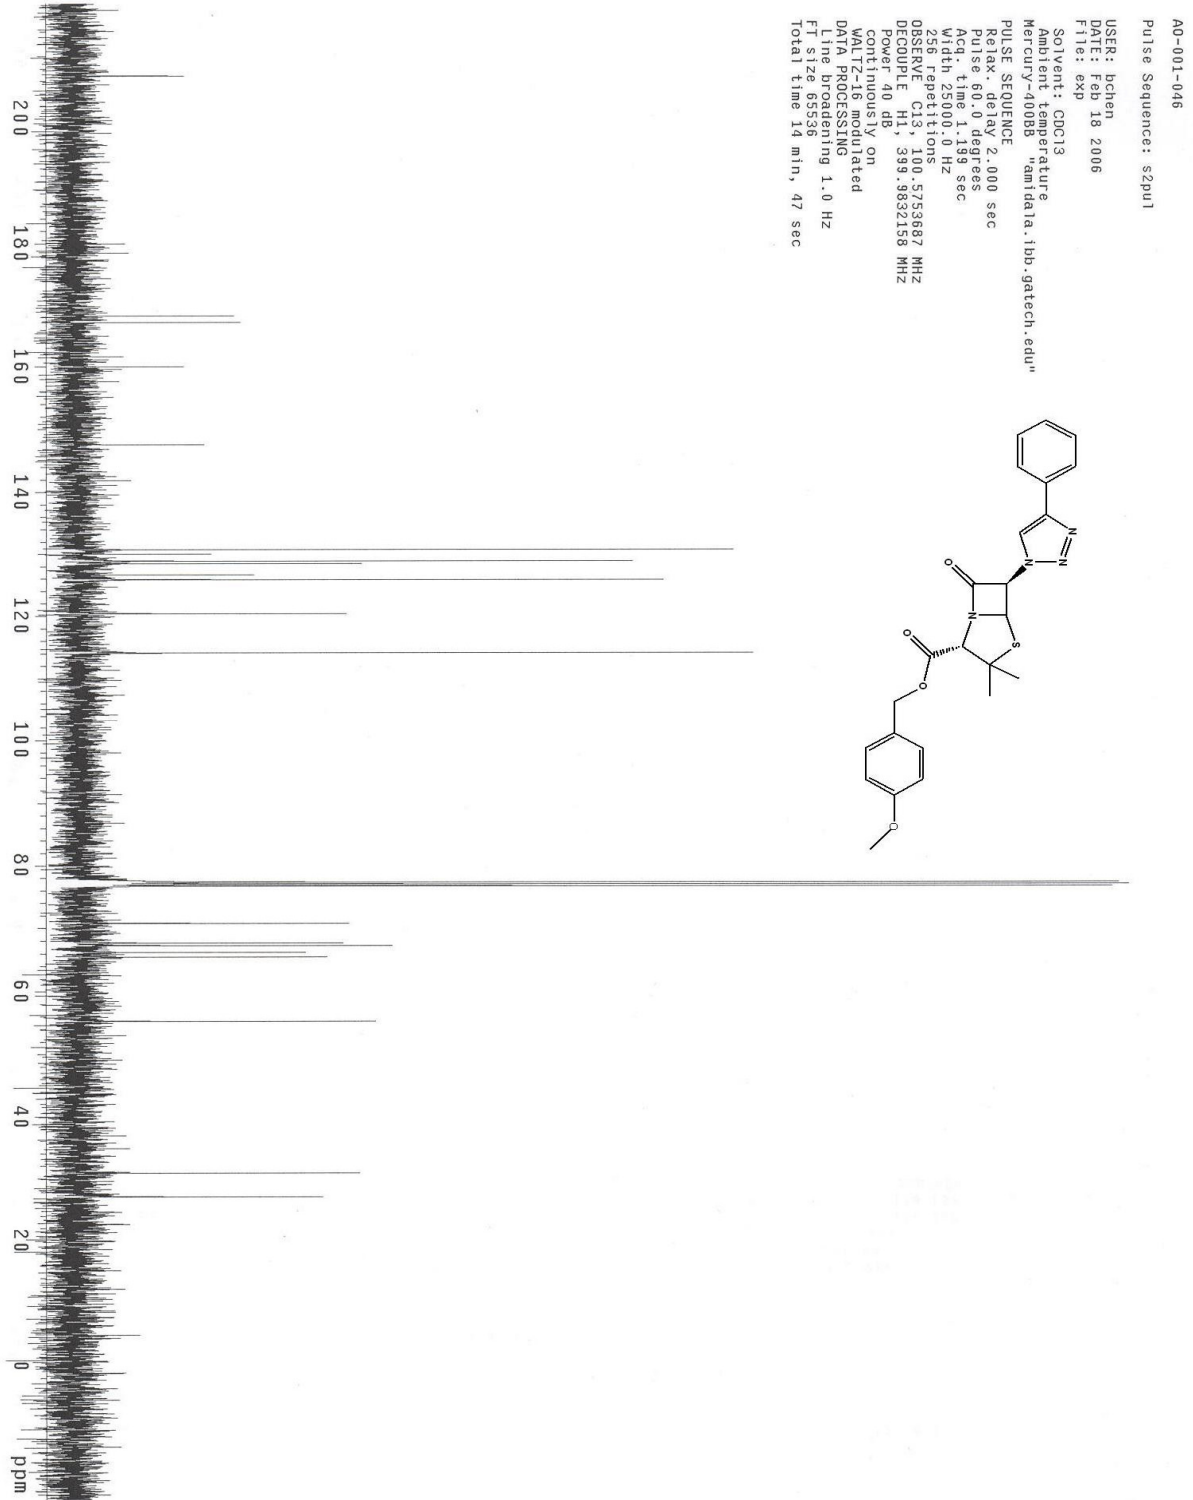

<sup>1</sup>H NMR of 11e.

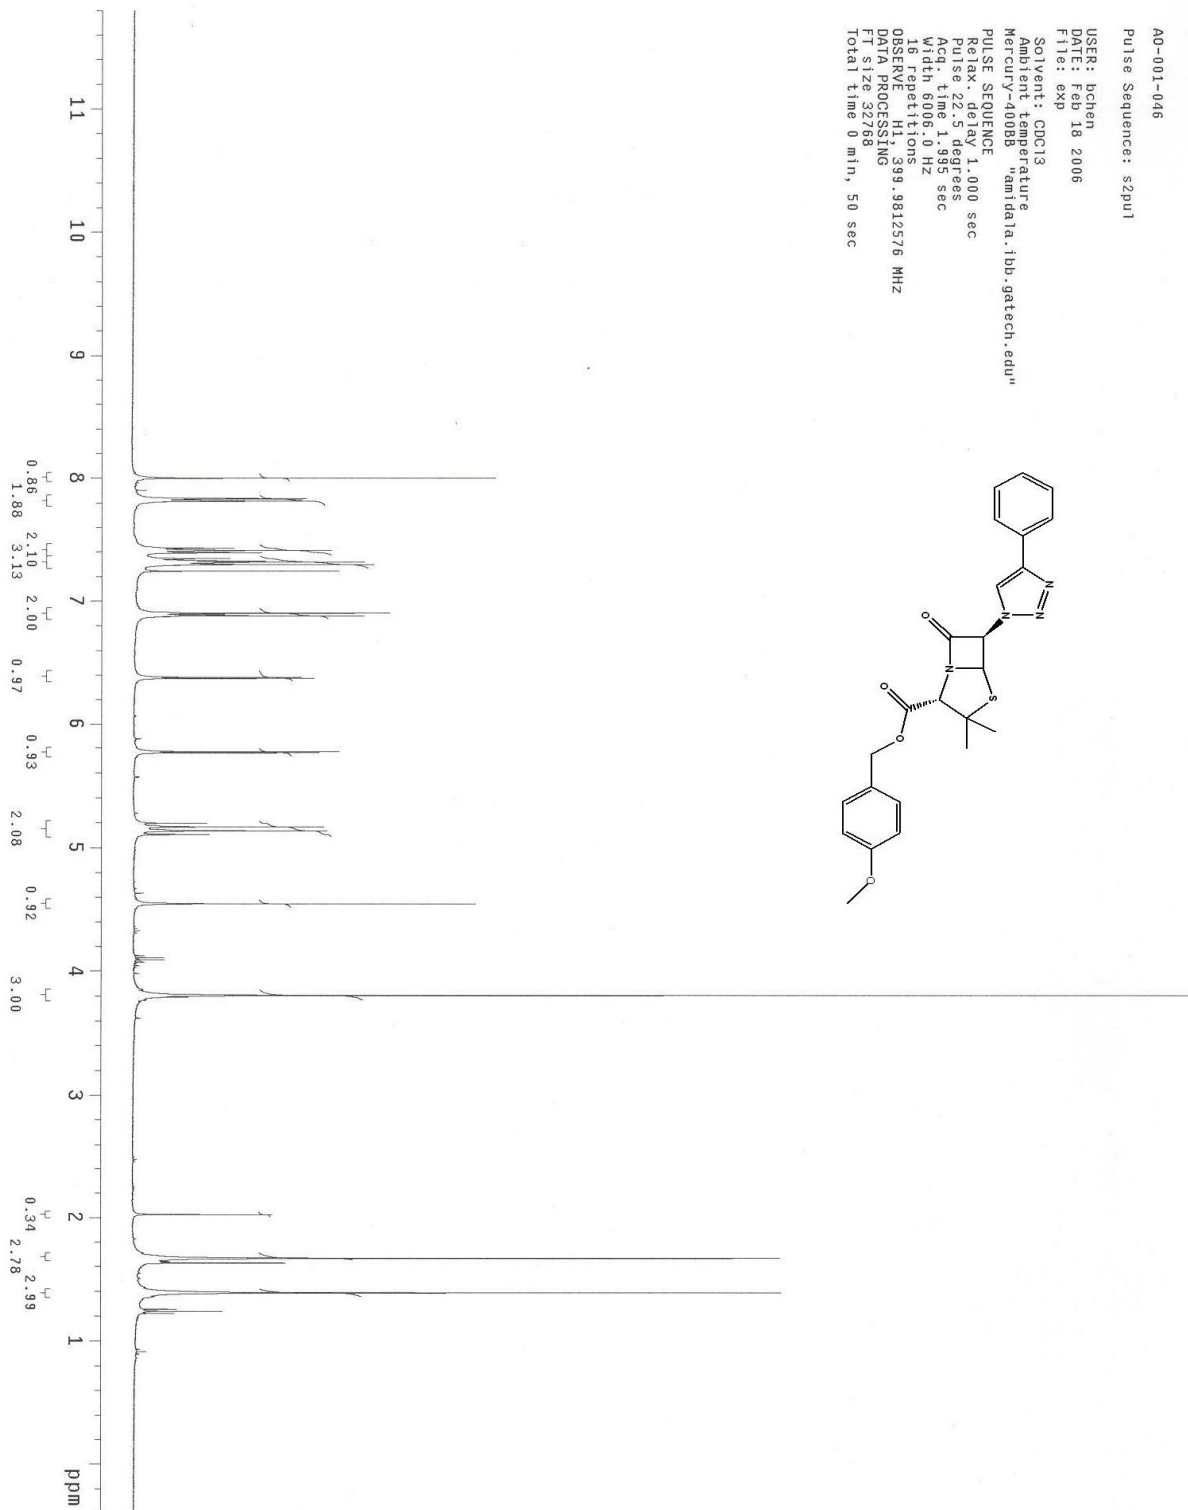

AO-001-046  
Pulse Sequence: s2pu1  
USER: bchen  
DATE: Feb 18 2006  
File: exp  
SOLVENT: CDCl3  
Ambient temperature  
Mercury-400BB "amida.la.tib.gatech.edu"  
PULSE SEQUENCE  
Relax: delay 1.000 sec  
Pulse: 22.5 degrees  
Acq: time 1.935 sec  
Wdth: 100 Hz  
16 repetitions  
OBSERVE H1 399.9812576 MHZ  
DATA PROCESSING  
FT size 32788  
Total time 0 min, 50 sec

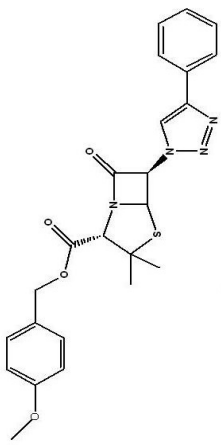

<sup>13</sup>C NMR of 11f:

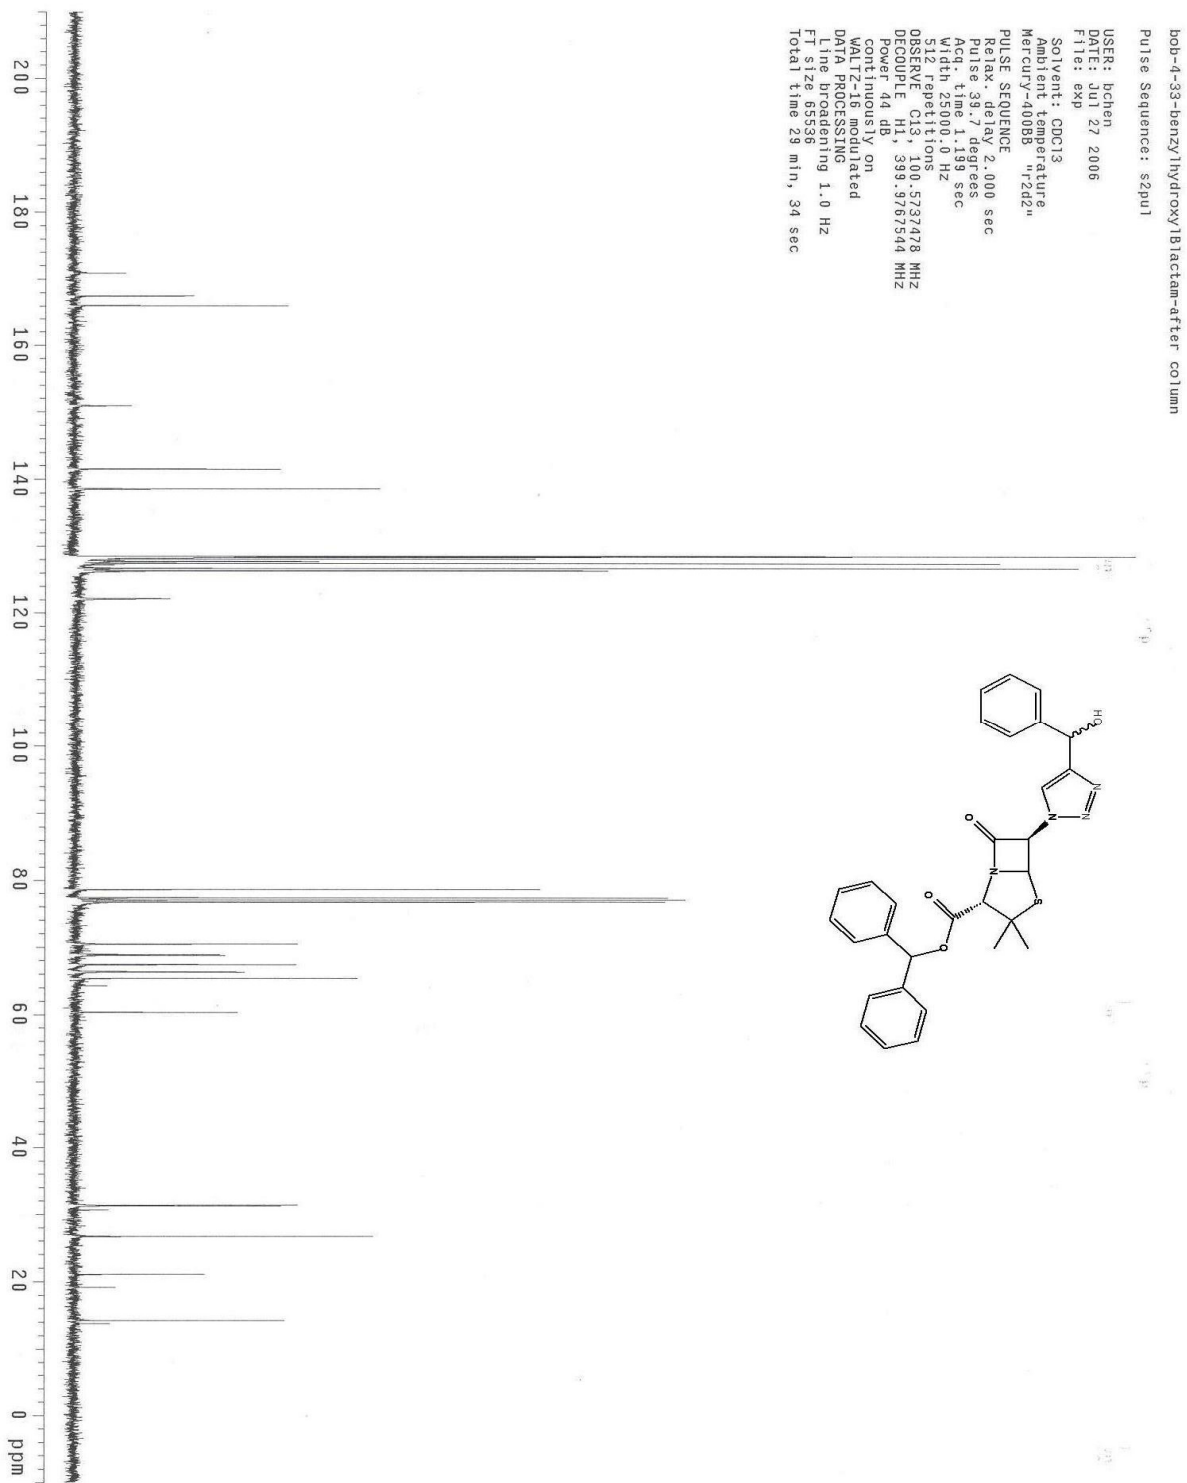



<sup>1</sup>H NMR of 11f:

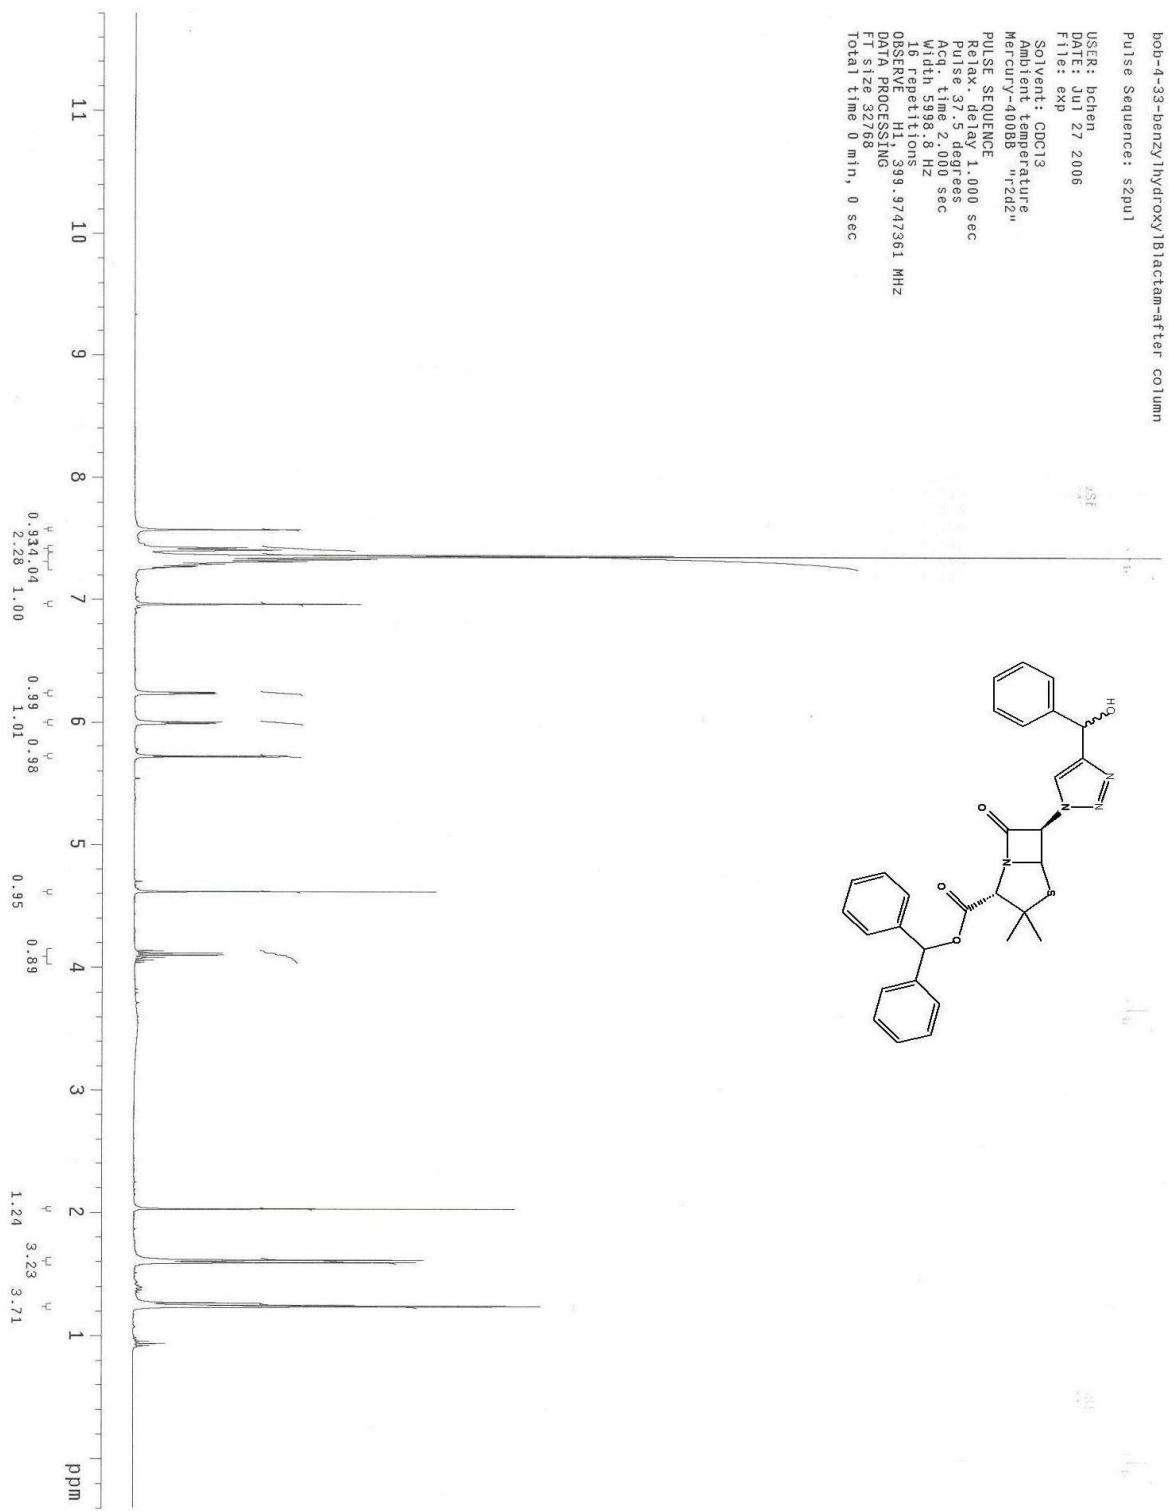

<sup>1</sup>H NMR of **11g**:

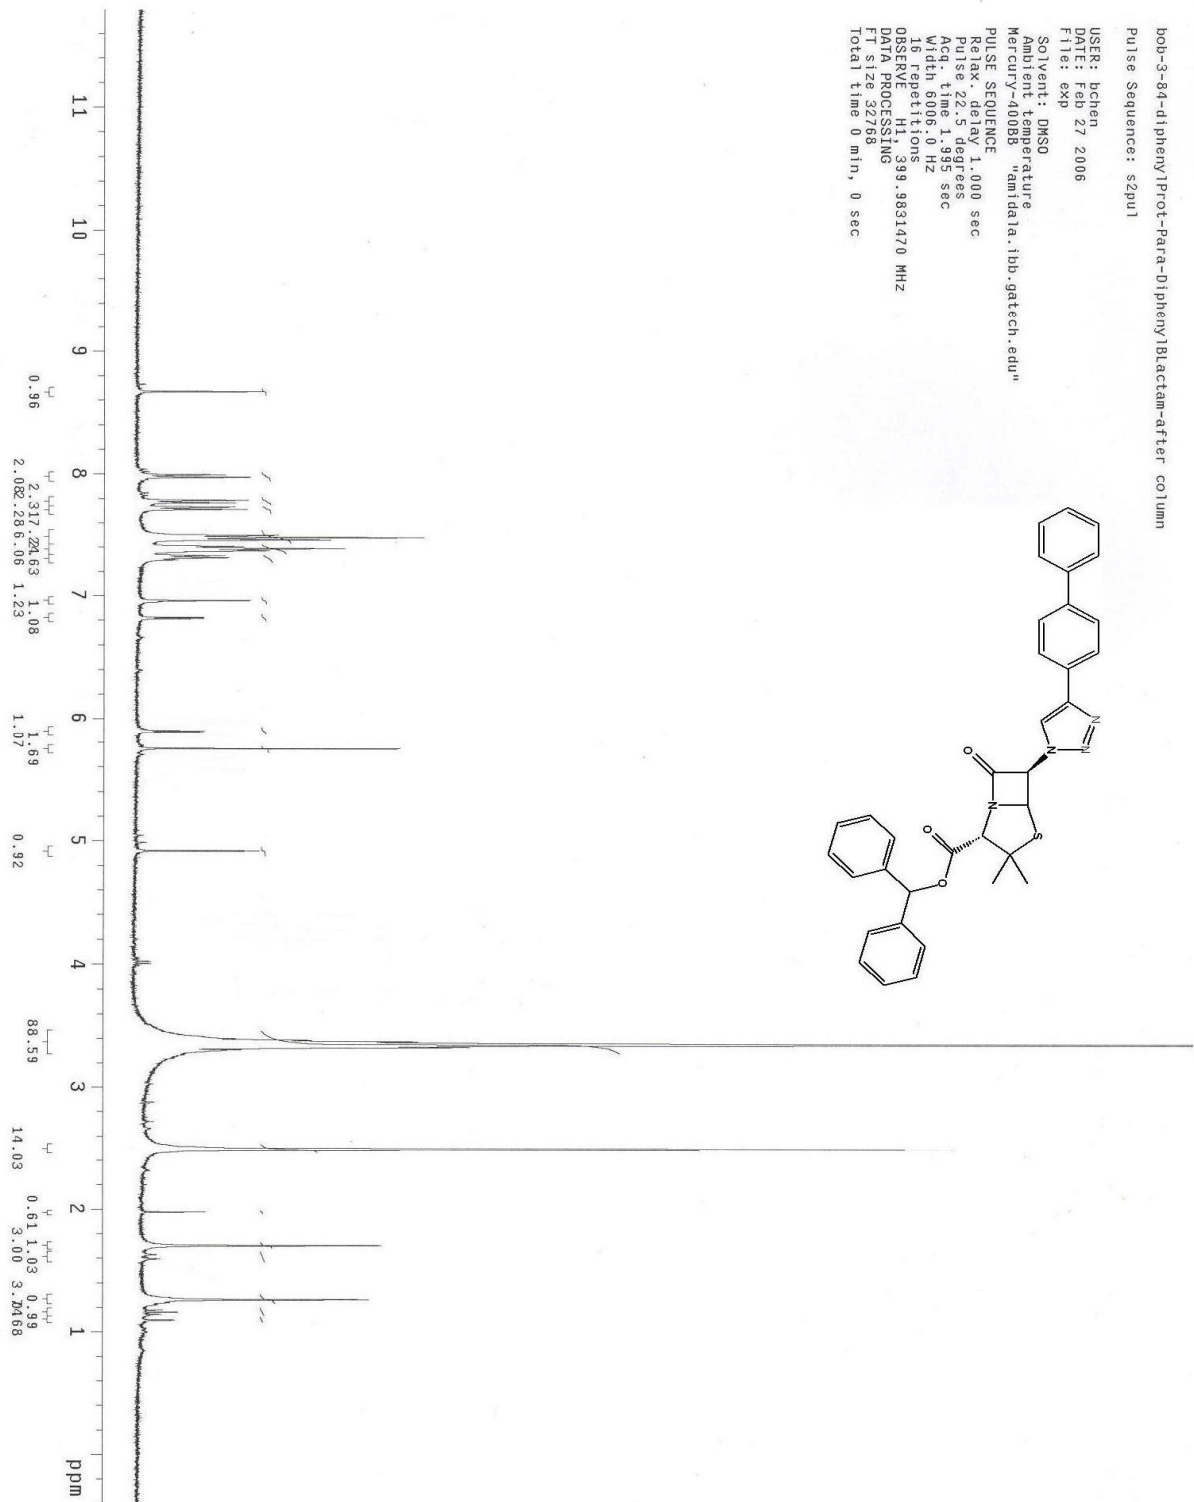

<sup>13</sup>C NMR of 11h:

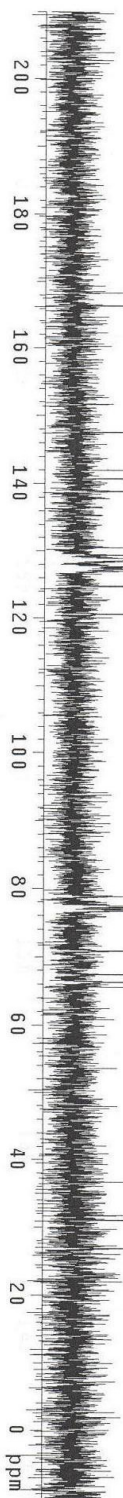

bob-3-90-after 2 column  
Pulse Sequence: s2pu1  
USER: hchen  
DATE: Mar 7 2006  
File: exp  
Solvent: CDCl3  
Ambient temperature  
Mercury-400Bb "amidata.ibh.gatech.edu"  
PULSE SEQUENCE  
Relax. delay 2.000 sec  
Pulse program  
Acq. time 1.199 sec  
Width 23000.0 Hz  
Spectrum  
06SERV03 0 5759695 MHz  
DECUPLE H1 399.9822158 MHz  
Power 40 dB  
continuously on  
WALTZ-16 modulated  
DATA PROCESSING  
Line broadening 1.0 HZ  
FT size 65536  
Total time 14 min, 47 sec

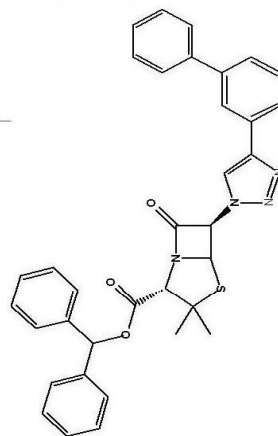

<sup>1</sup>H NMR of 11h:

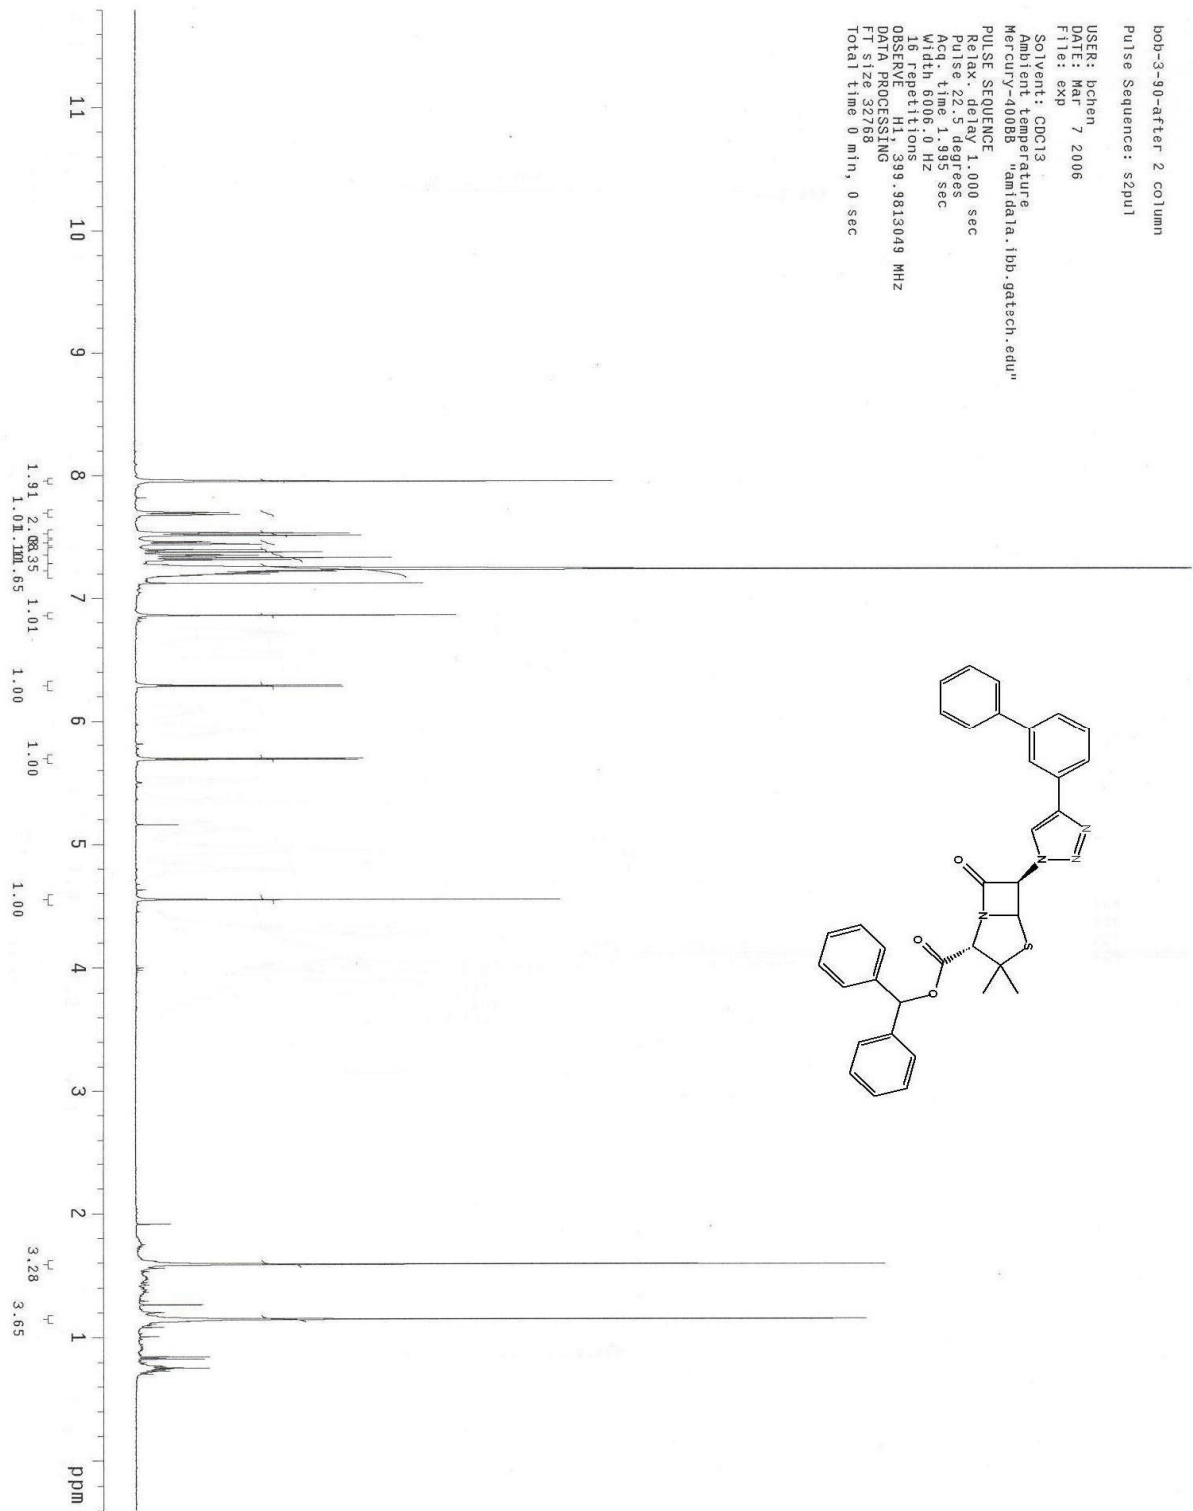

<sup>13</sup>C NMR of 11i:

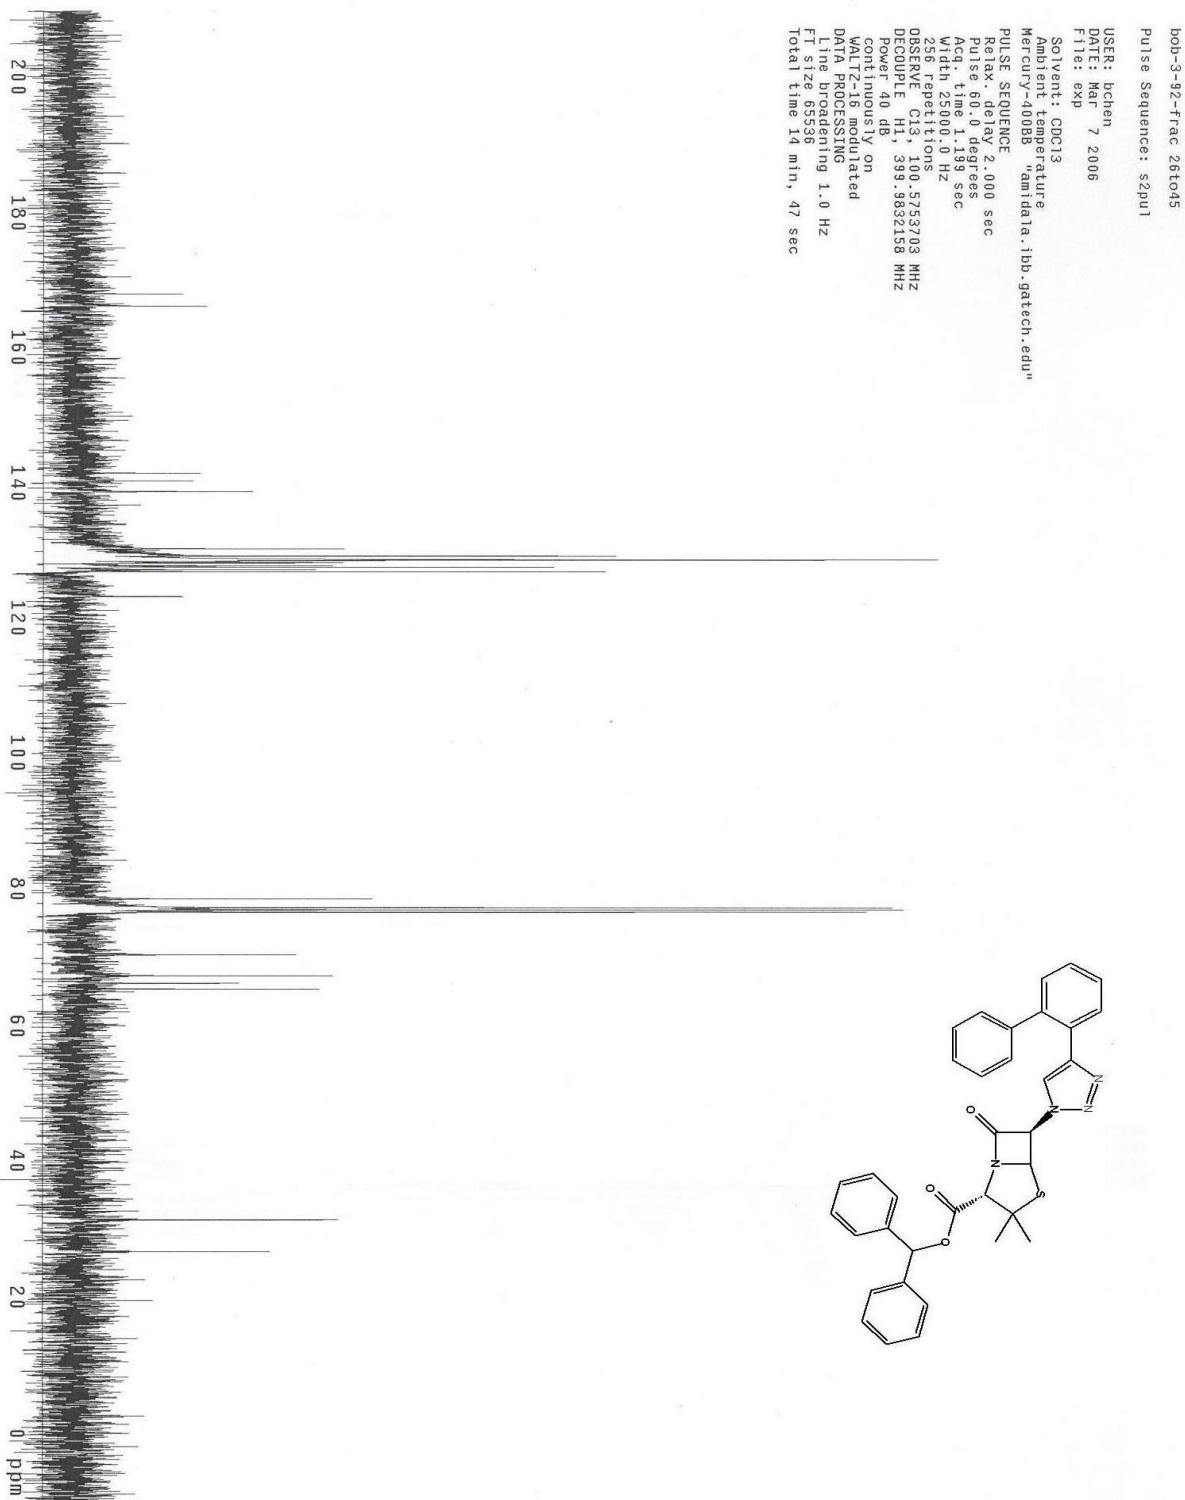

<sup>1</sup>H NMR of **11i**:

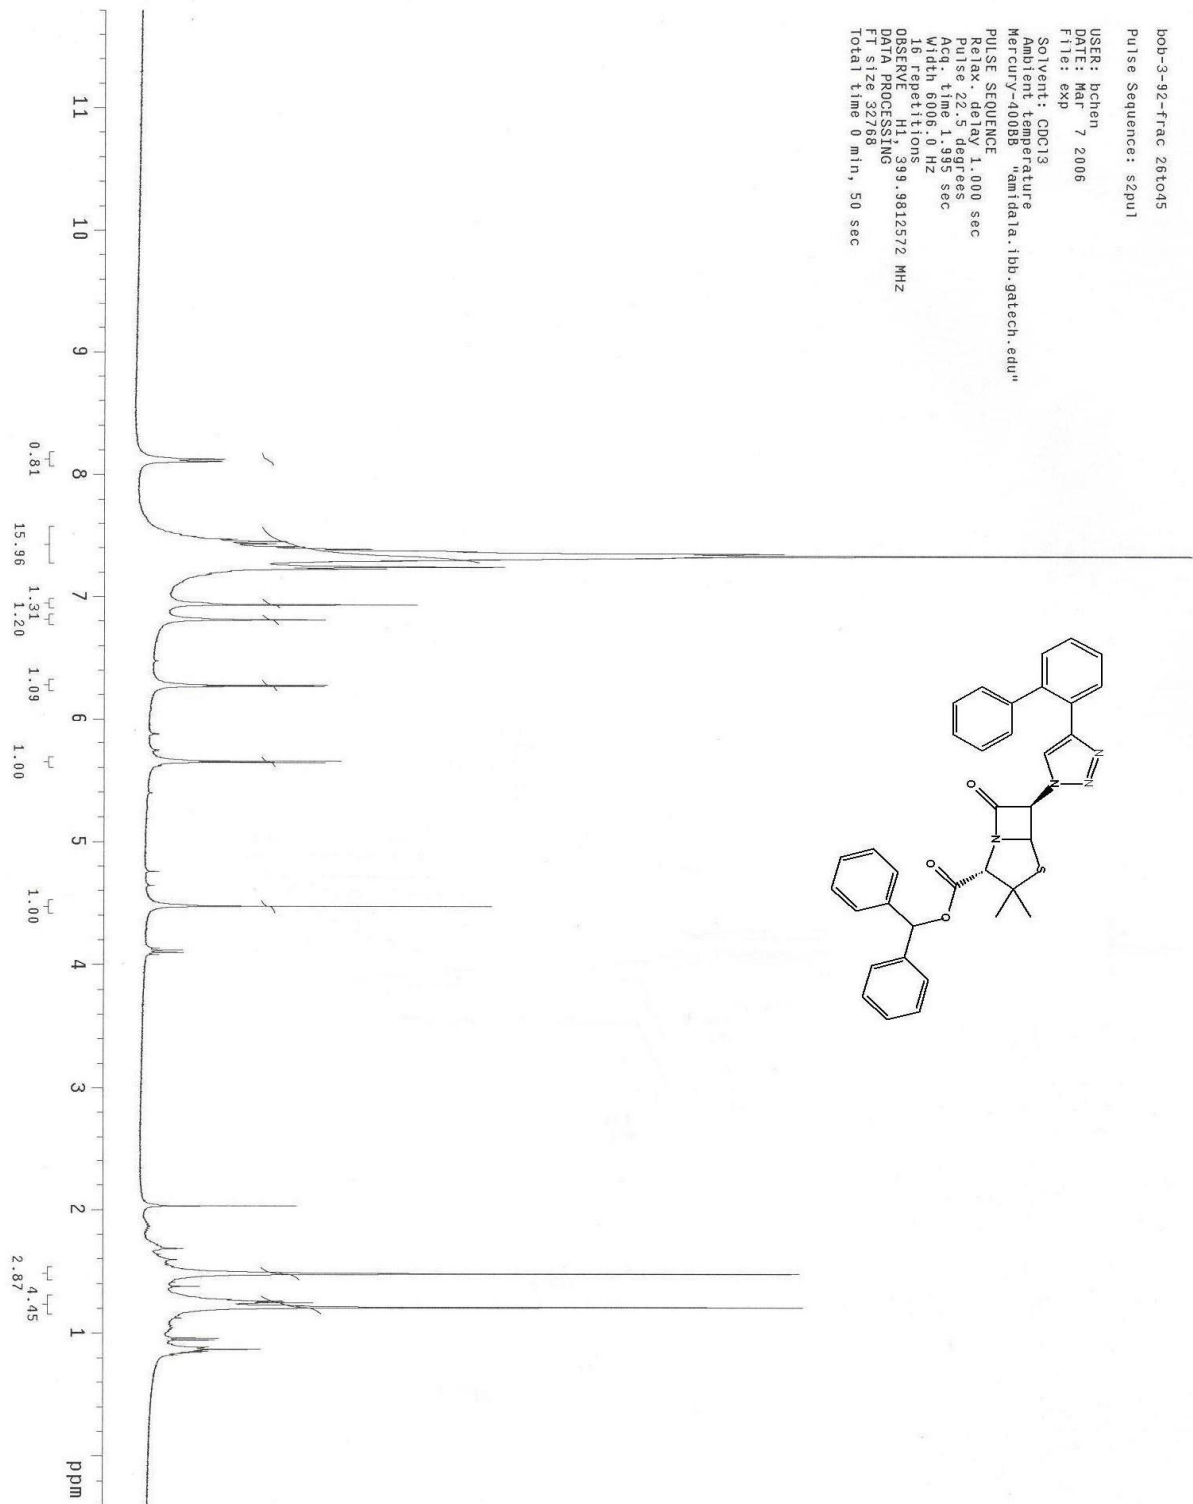

<sup>13</sup>C NMR of 11j:

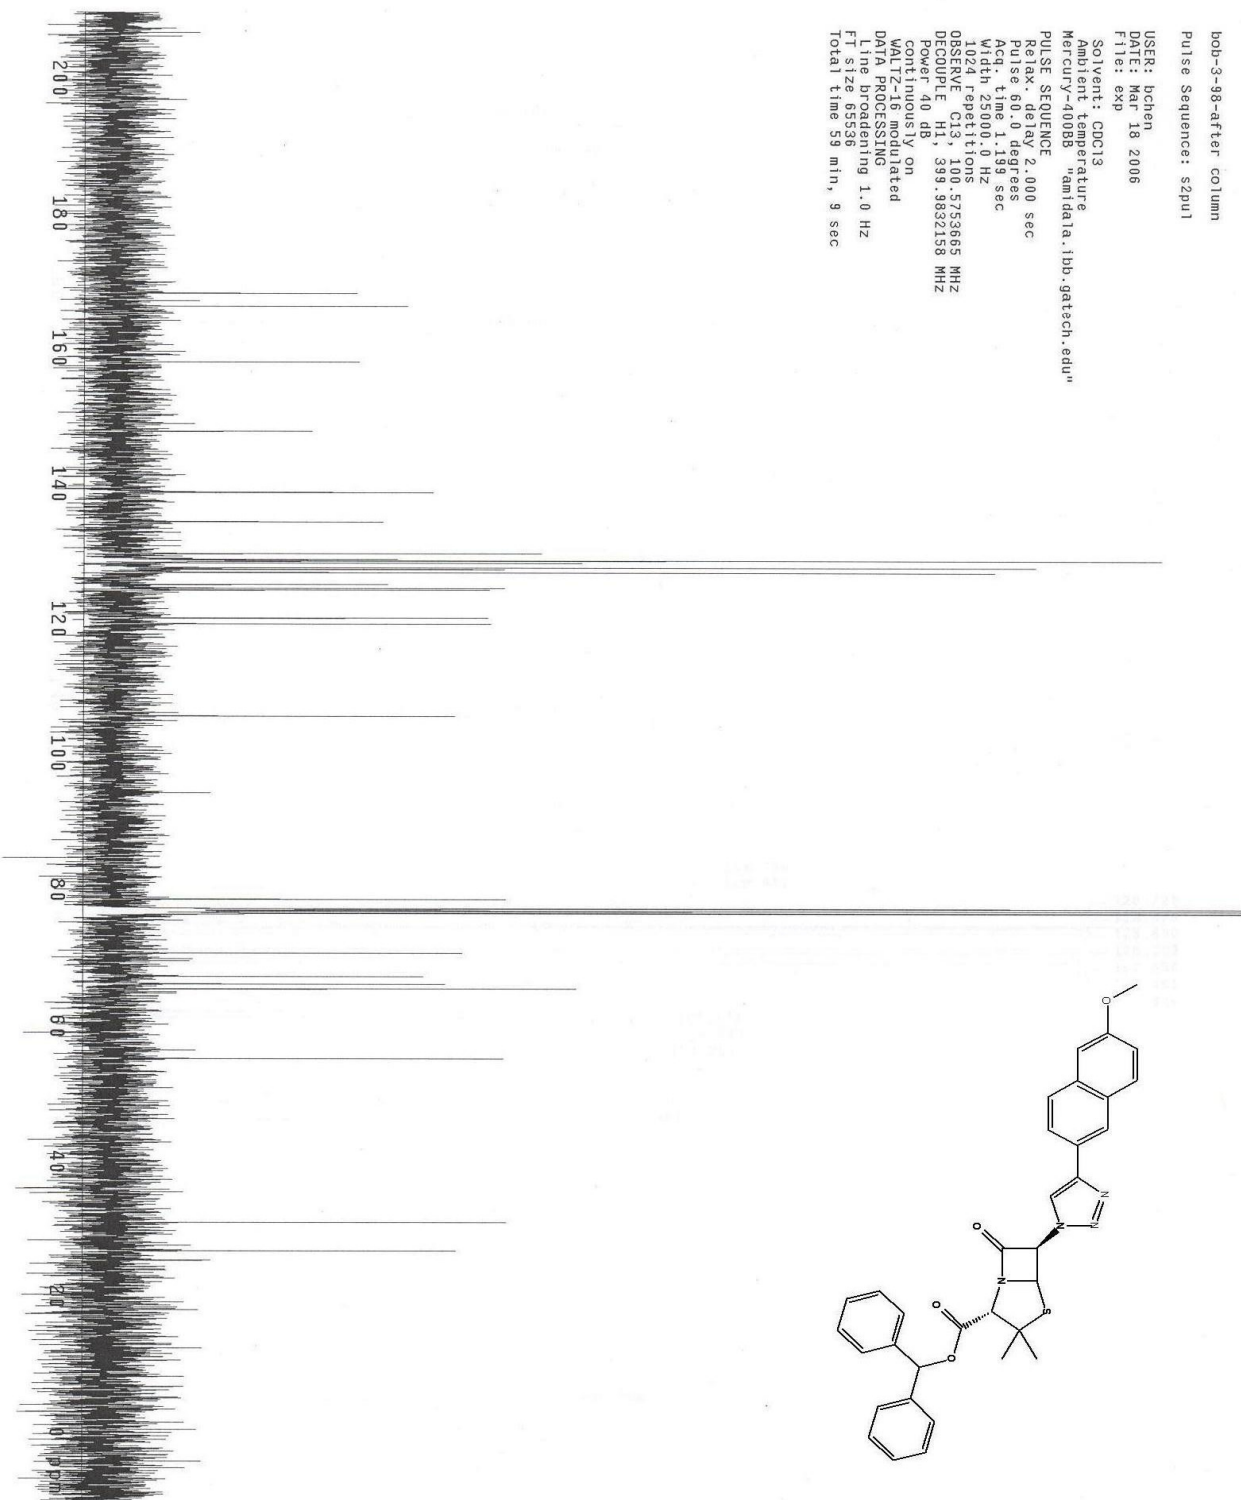

bob-3-98-after column  
Pulse Sequence: s2pu1  
USER: bchen  
DATE: Mar 18 2006  
File: exp  
Solvent: CDCl3  
Ambient temperature  
Mercury-400BB "amidata.lib.gatech.edu"  
PULSE SEQUENCE  
Relax delay/ 2.000 sec  
Pulse prog/ zgpg30  
Acq. time/ 1.199 sec  
Width/ 25000.0 Hz  
1024 Repetitions  
OBSERVE/ C13, 100.5753665 MHz  
DECUPLE/ H1, 399.9832158 MHz  
Power/ 40 dB  
continuously on  
WALTZ-16 modulated  
DATA PROCESSING  
Line broadening/ 1.0 Hz  
FT size/ 65536  
Total time/ 59 min, 9 sec

<sup>1</sup>H NMR of 11j:

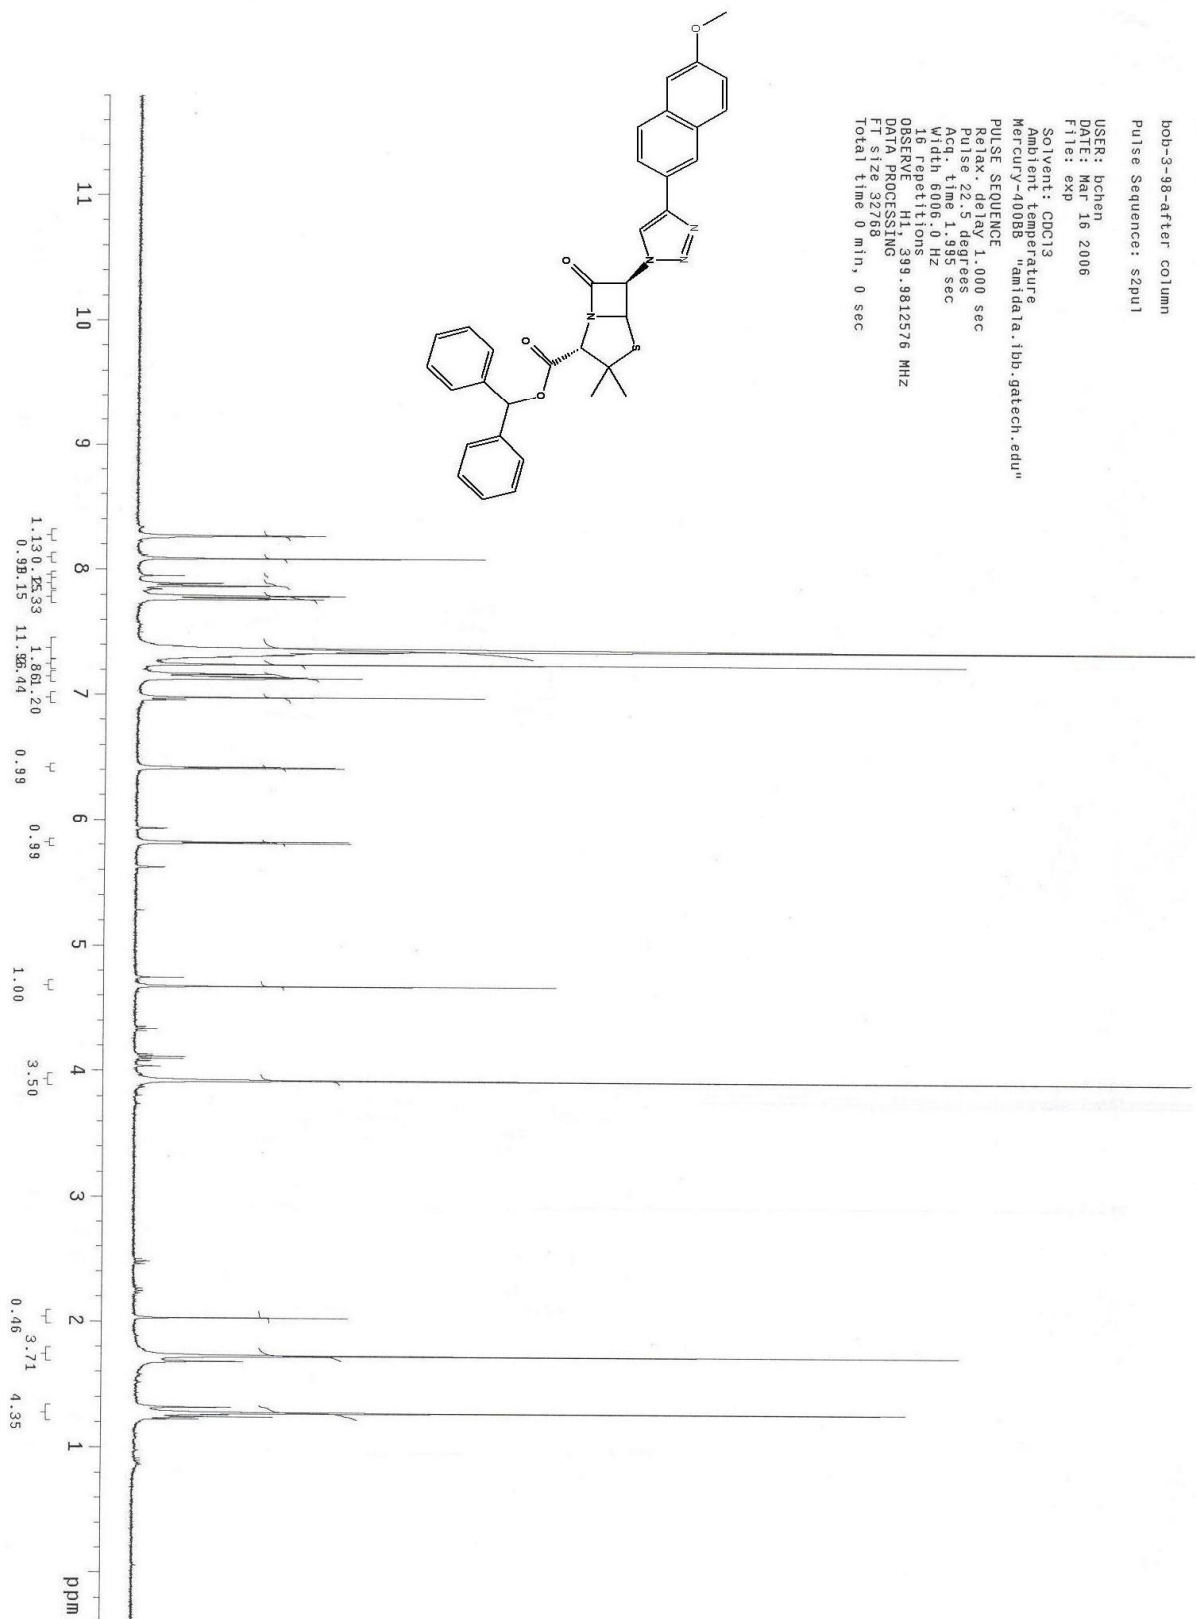



<sup>13</sup>C NMR of 11k:

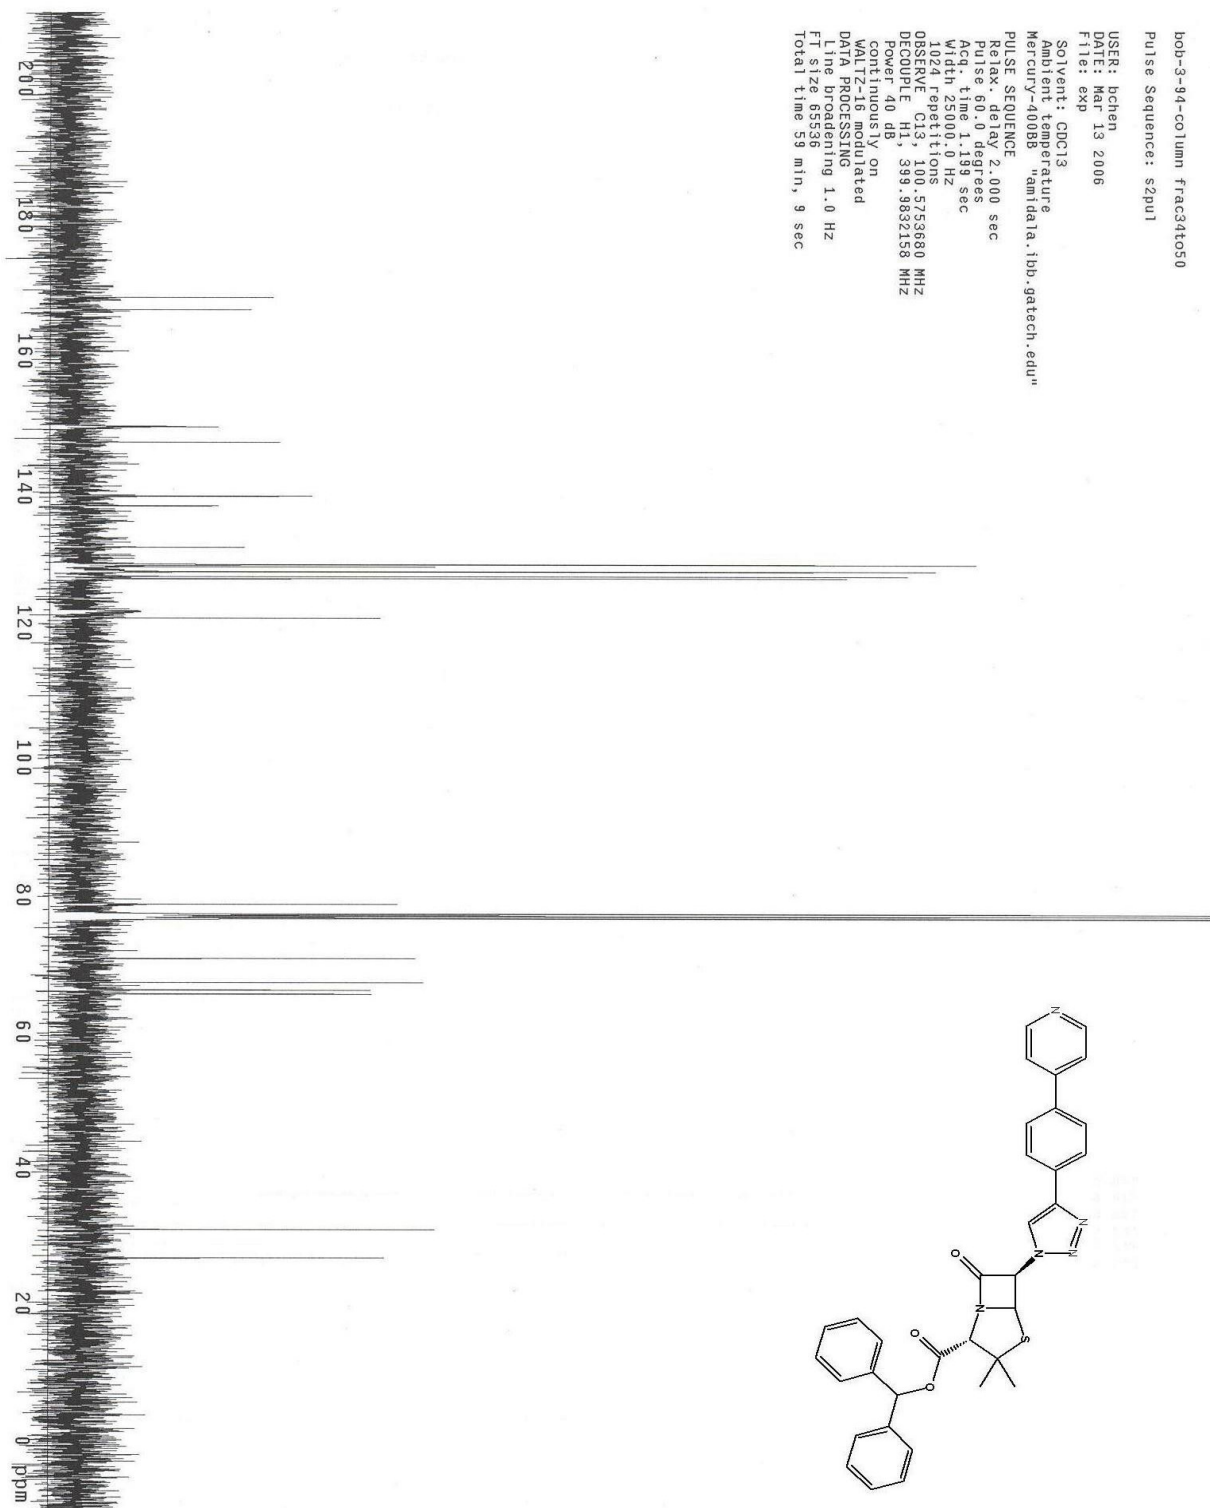

bob-3-94-column frac34to50  
Pulse Sequence: s2pu1  
USER: bchen  
DATE: Mar 13 2006  
File: exp  
Solvent: CDCl3  
Ambient temperature  
Mercury-400B8 "amidata.lib.gatech.edu"  
PULSE SEQUENCE  
Relax: delay 2.000 sec  
Pulse 60.0 degrees  
Acq. time 1.199 sec  
Width 25000.0 Hz  
1024 Repetitions  
OBSERVE C13, 100.5753680 MHz  
DECUPLE H1, 399.9632156 MHz  
Power 40 dB  
continuously on  
WALTZ-16 modulated  
DATA PROCESSING  
Line broadening 1.0 Hz  
File size 65536  
Total time 59 min, 9 sec

<sup>1</sup>H NMR of 11k:

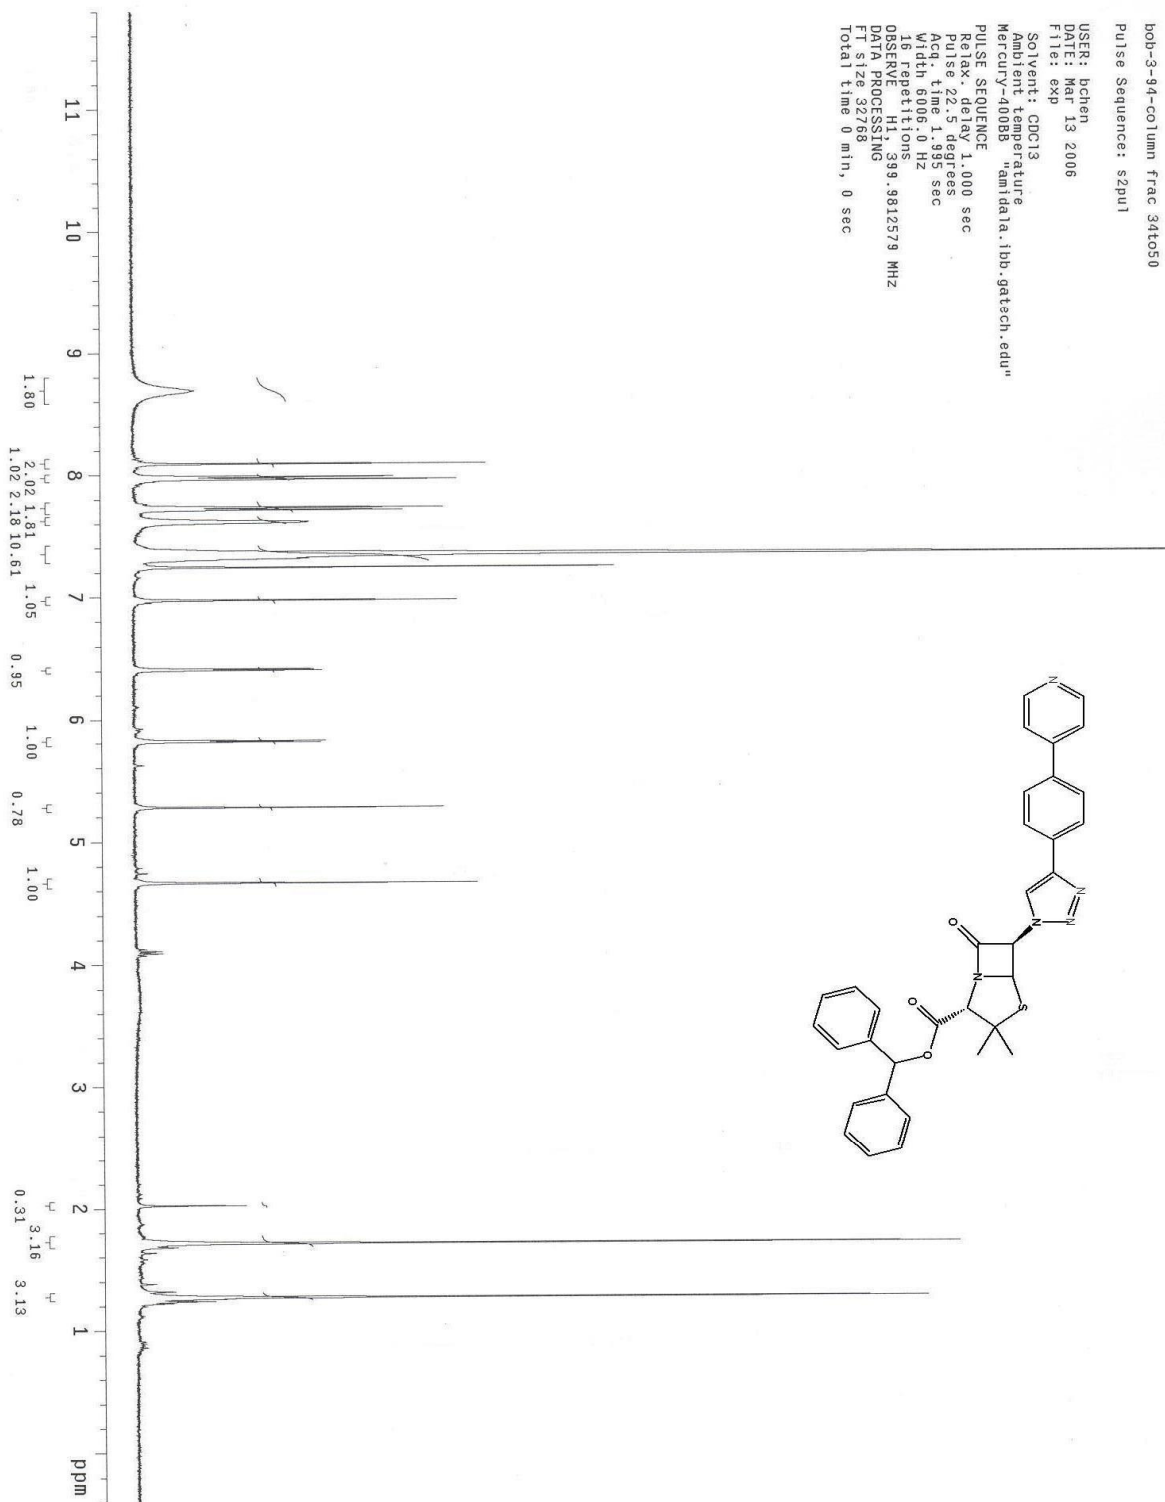

<sup>13</sup>C NMR of 11l:

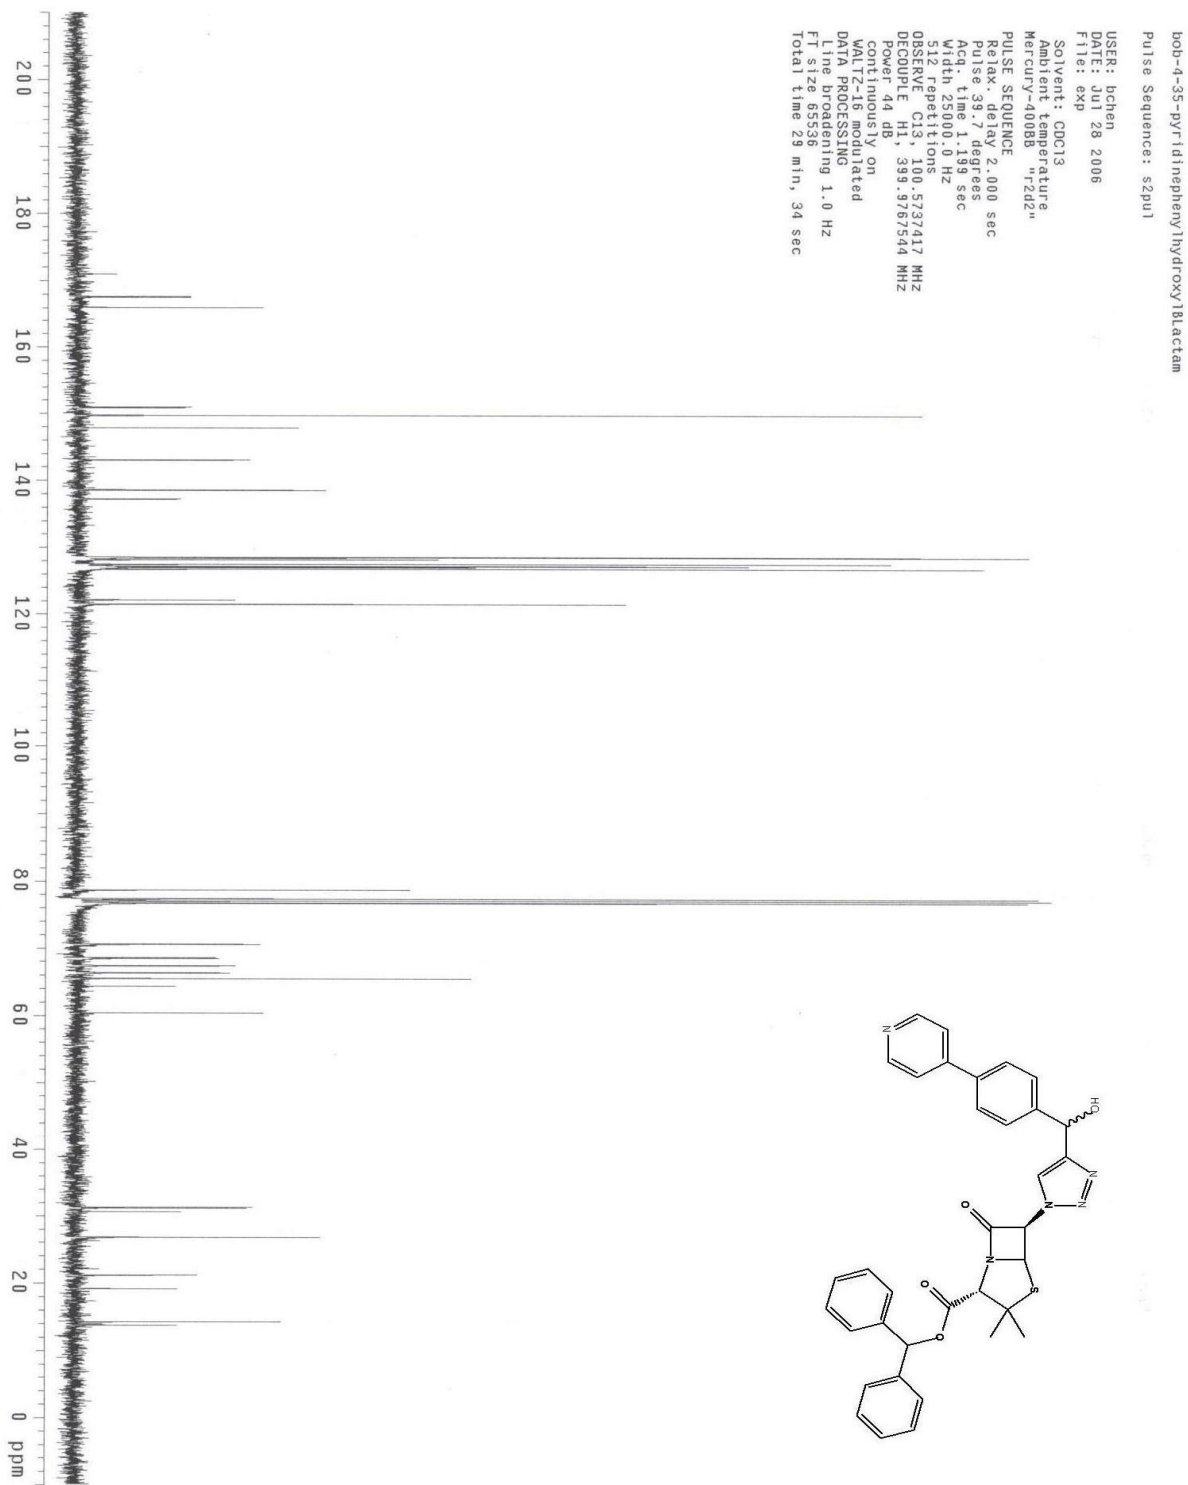

<sup>1</sup>H NMR of **11l**:

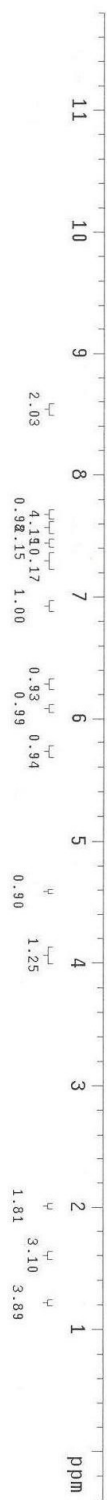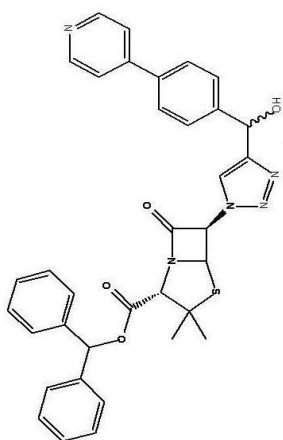

bob-4-35-pyr(1)naphenylhydroxy)lactam  
Pulse Sequence: s2pul1  
USER: bchen  
DATE: Jul 28 2006  
File: exp  
Solvent: CDCl3  
Ambient temperature  
Mercury-400BB "242"  
PULSE SEQUENCE  
Pulse program 1.000 sec  
Pulse 37.5 degrees  
Acq. time 2.000 sec  
Width 5998.8 Hz  
16 Repetitions  
OBSERVE H1. 399.9747427 MHz  
DATA PROCESSING  
FT size 32768  
Total time 0 min, 0 sec

<sup>13</sup>C NMR of 12a:

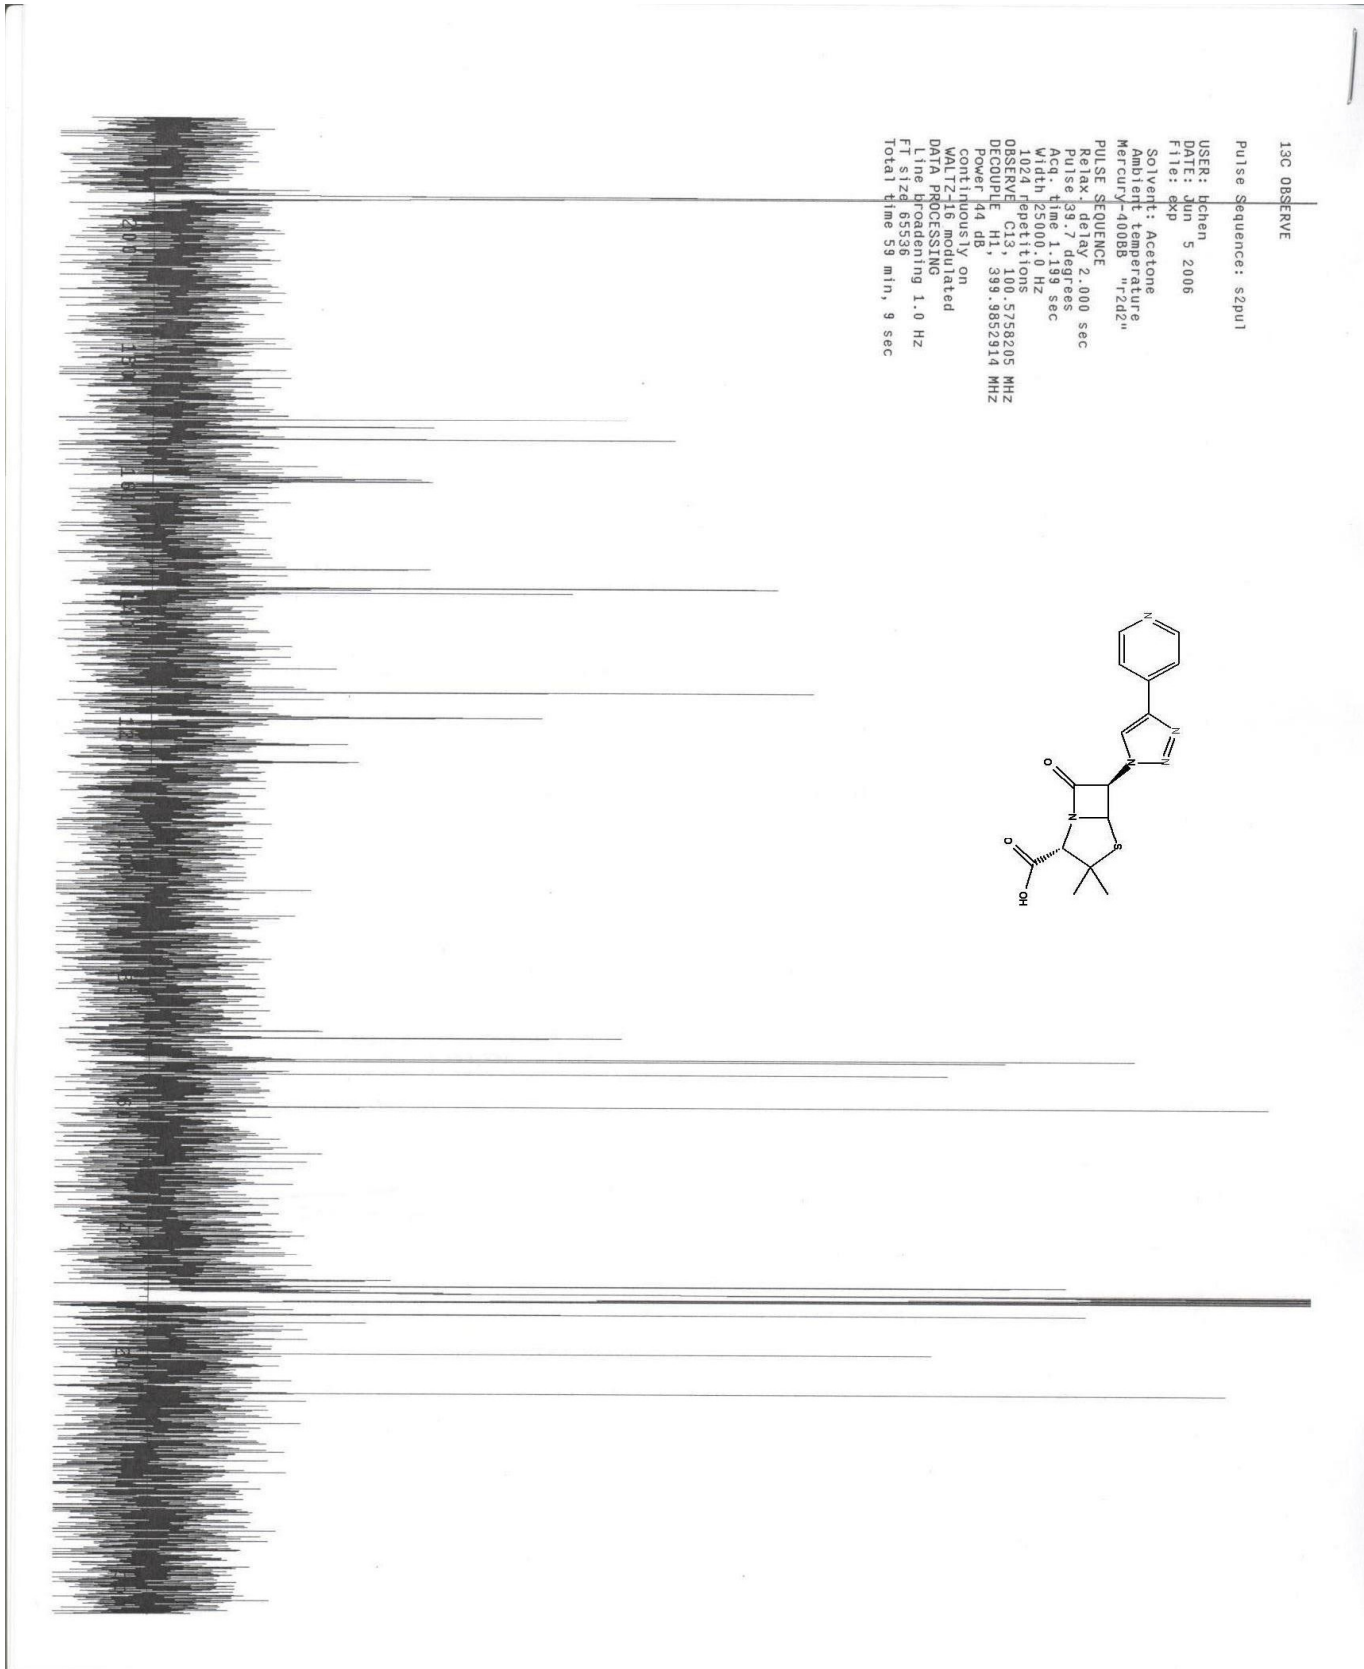

<sup>1</sup>H NMR of 12a:

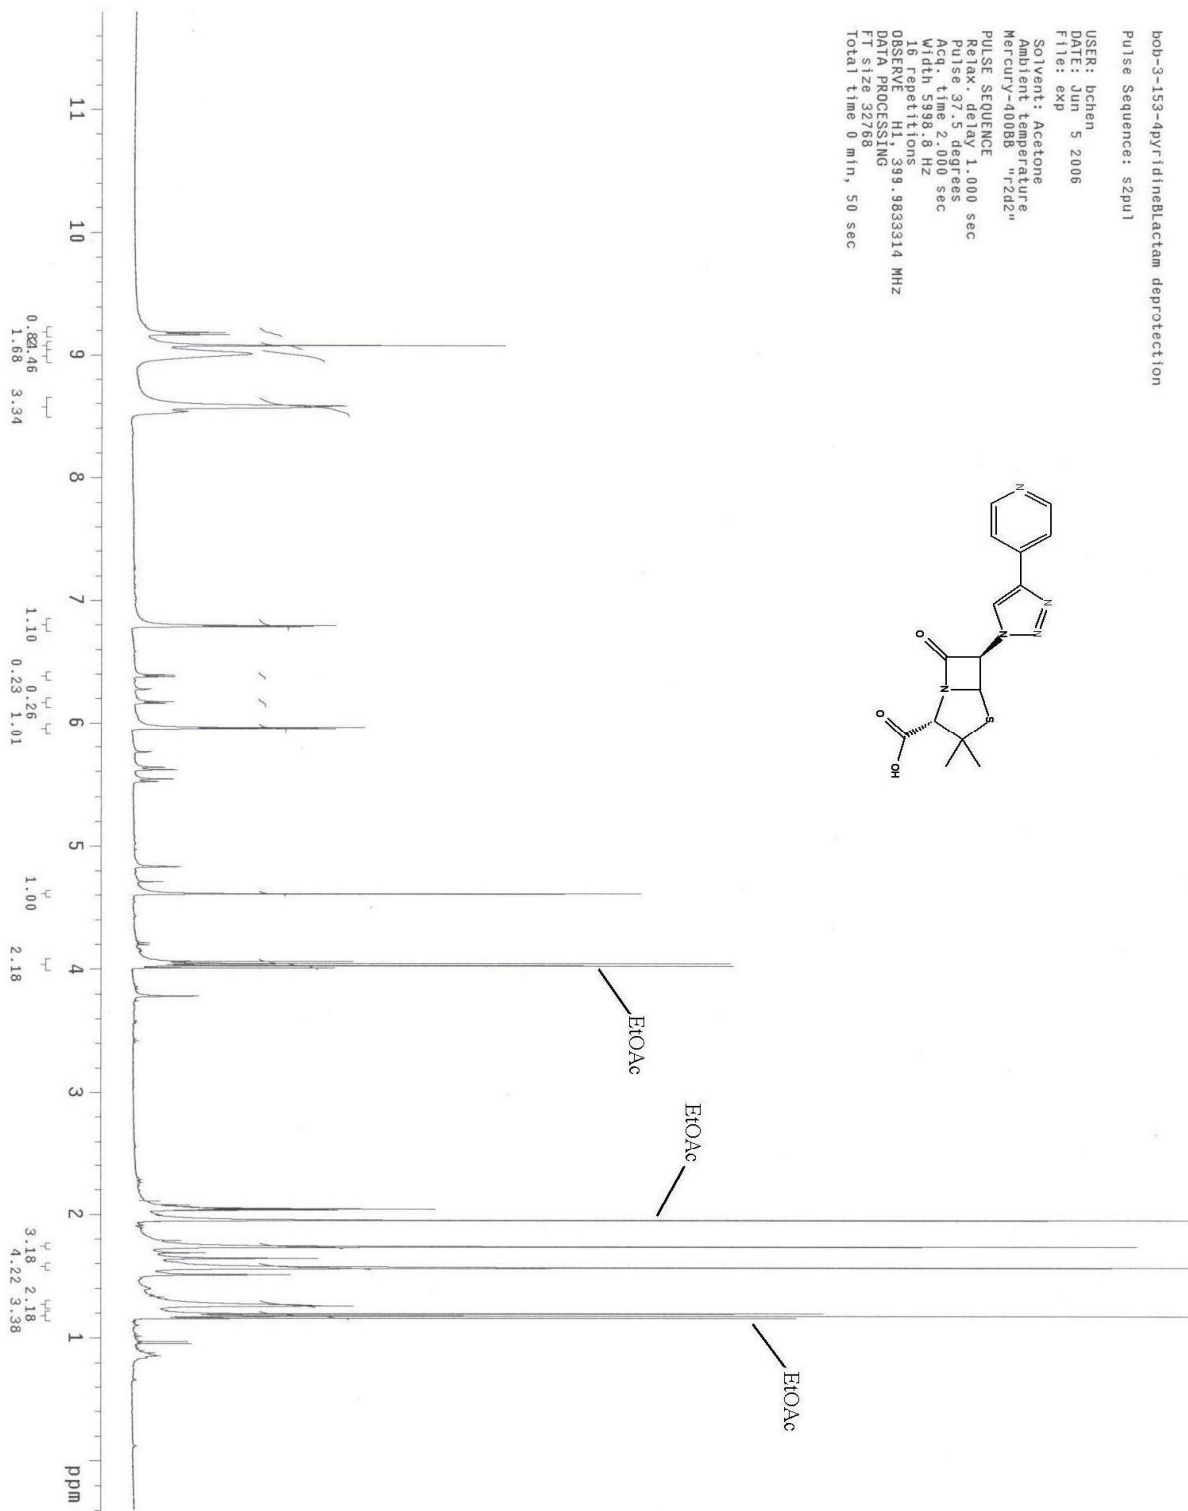

bob-3-153-4pyridineblactam deprotection  
Pulse Sequence: szpu1  
USER: bchen  
DATE: Jun 5 2006  
File: exp  
Solvent: Acetone  
Ambient Temperature  
Mercury-400BB "r2d2"  
PULSE SEQUENCE  
Relax: delay 1.000 sec  
Pulse: 37.5 degrees  
Acq: time 2.000 sec  
Fid: 339.8 Hz  
1.000000000  
ORSERV: H1 on 39.9833314 MHz  
DATA PROCESSING  
FT size 32768  
Total time 0 min, 50 sec

<sup>13</sup>C NMR of 12b:

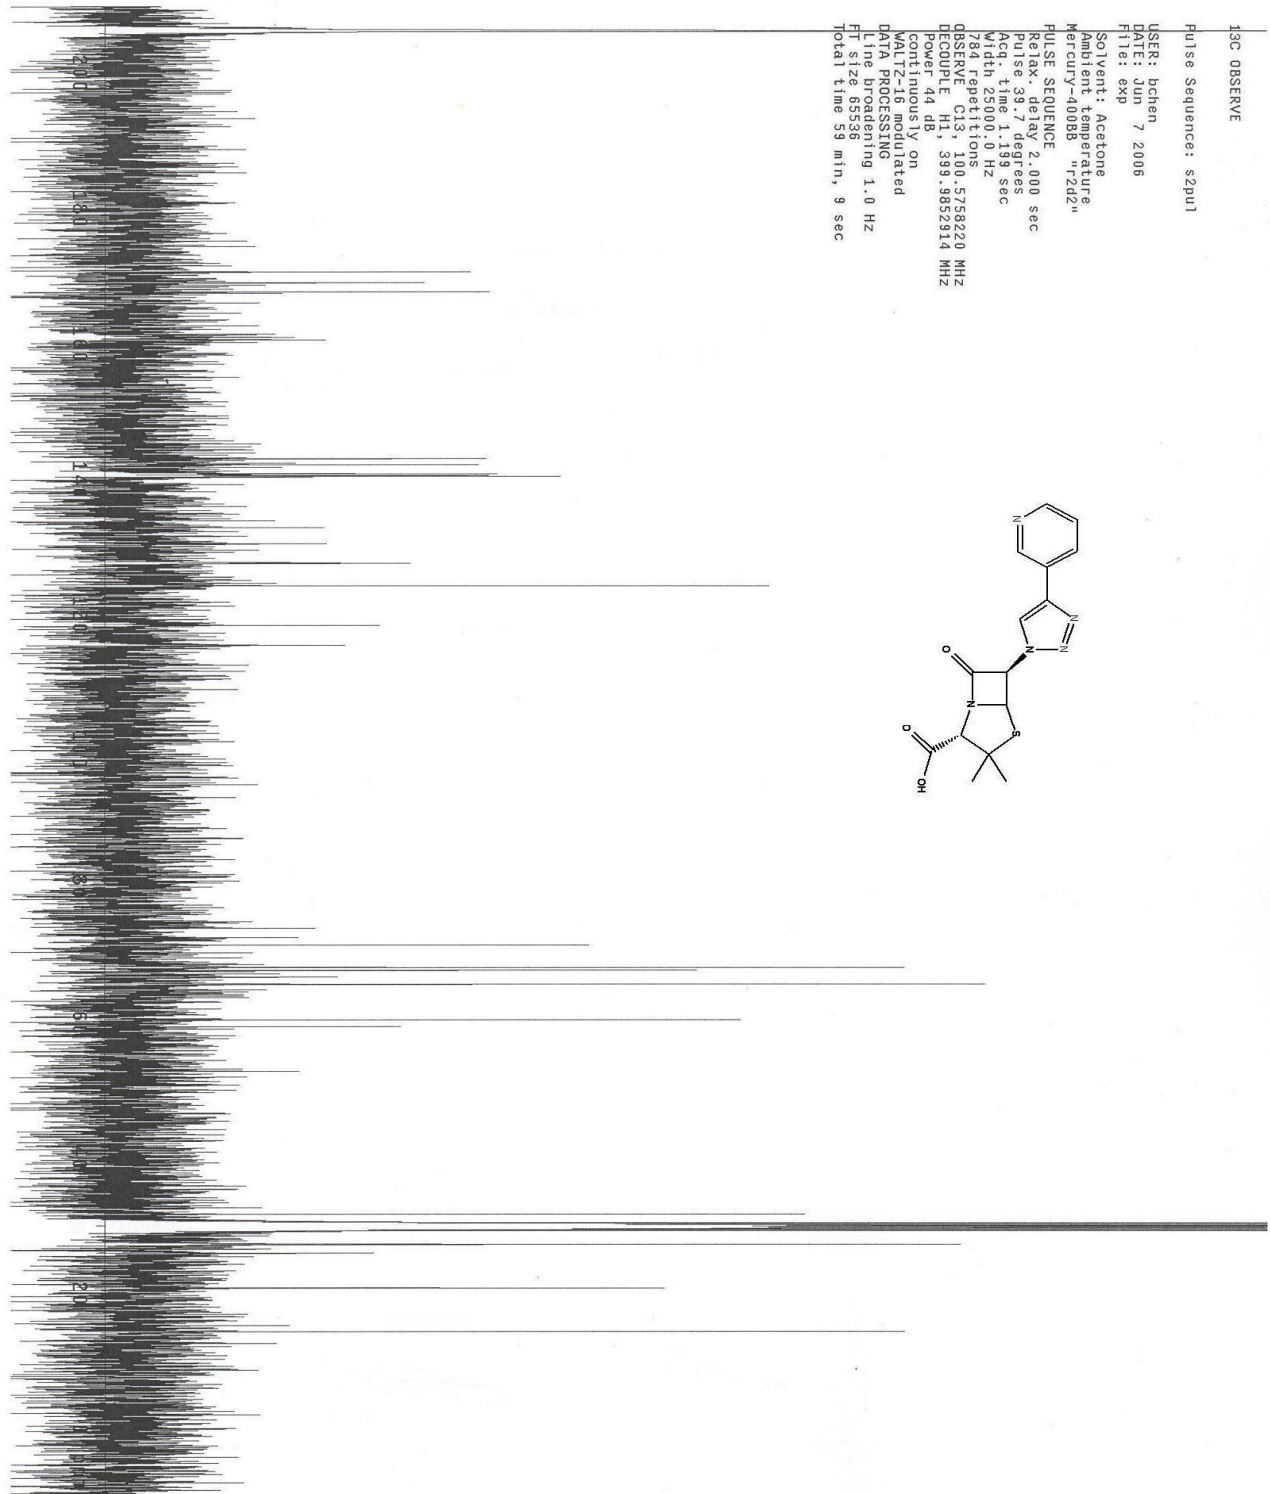

<sup>1</sup>H NMR of 12b:

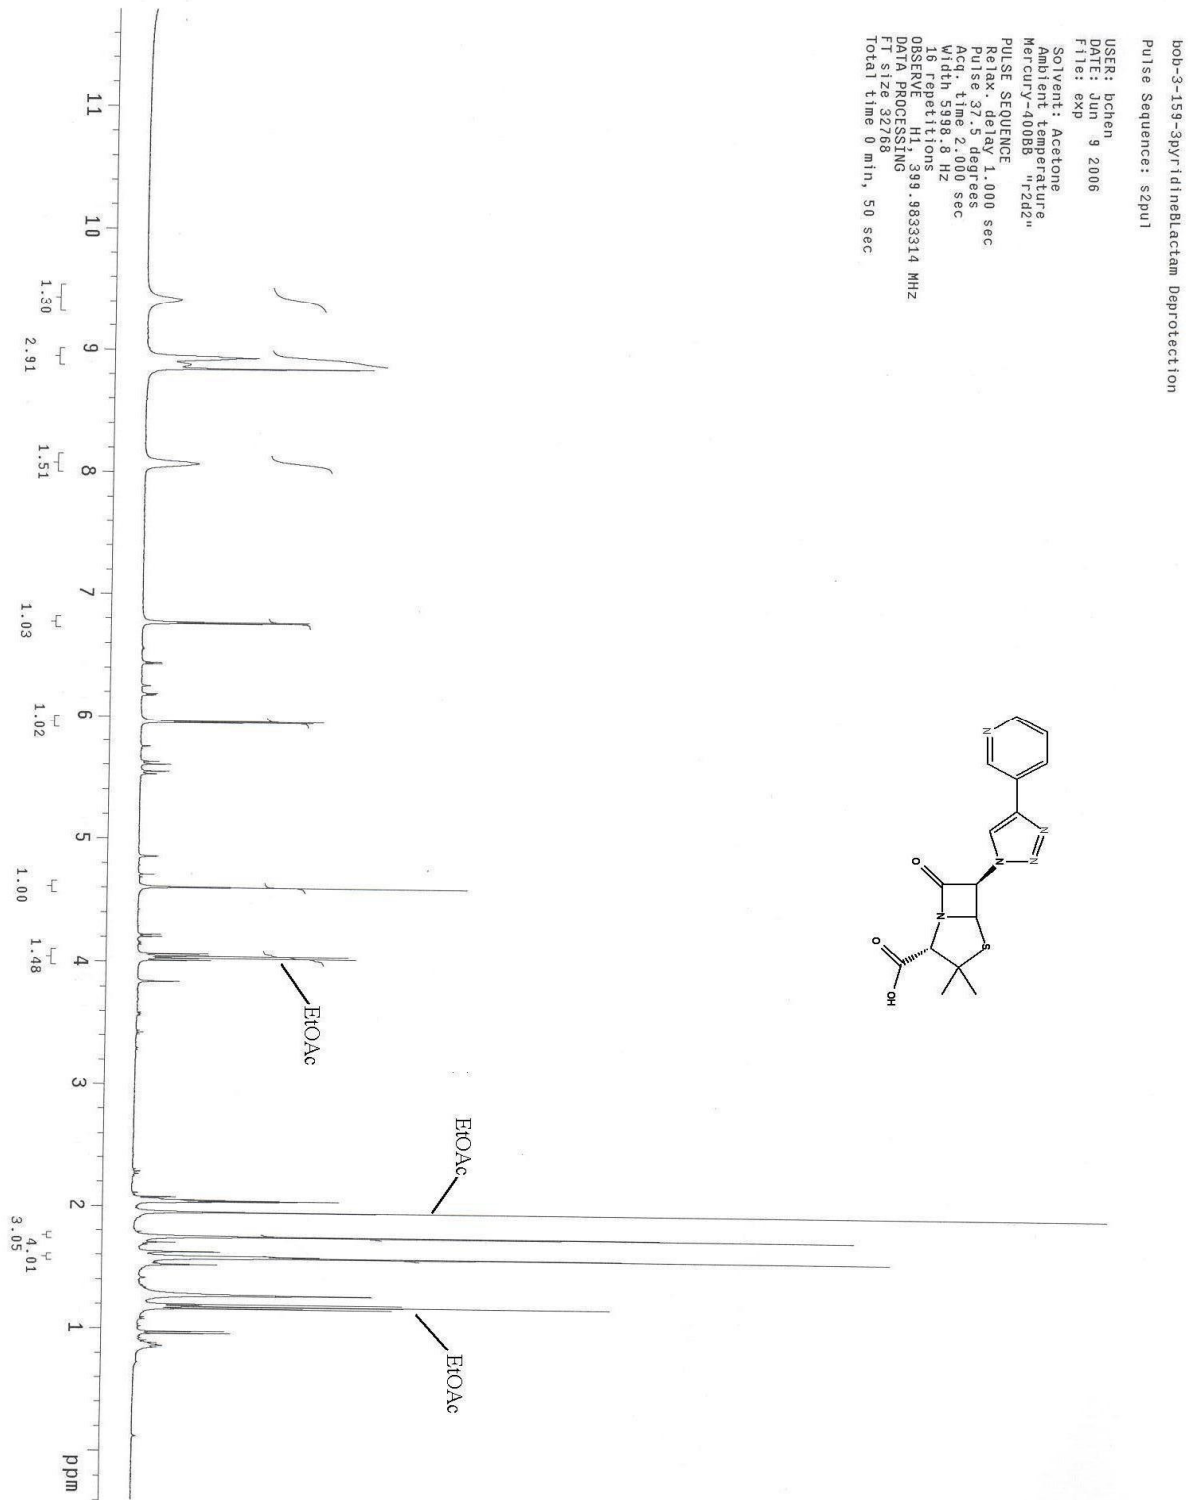



<sup>13</sup>C NMR of 12c:

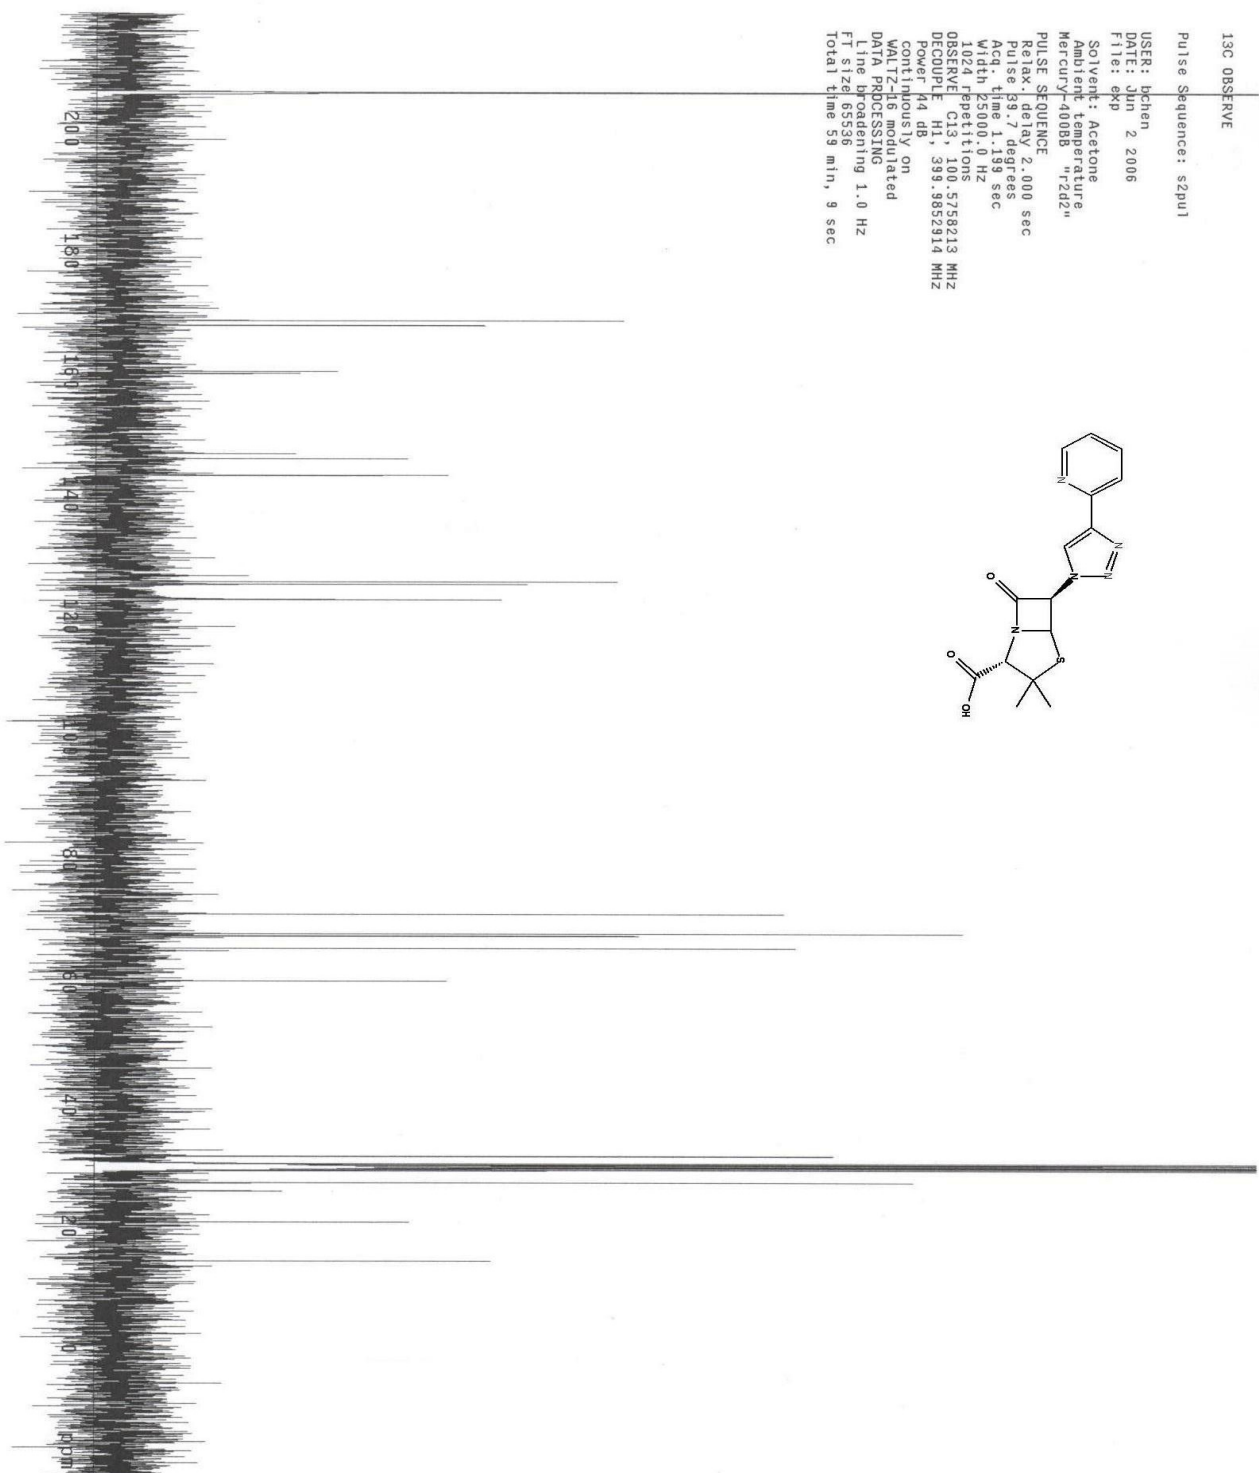

<sup>1</sup>H NMR of 12c:

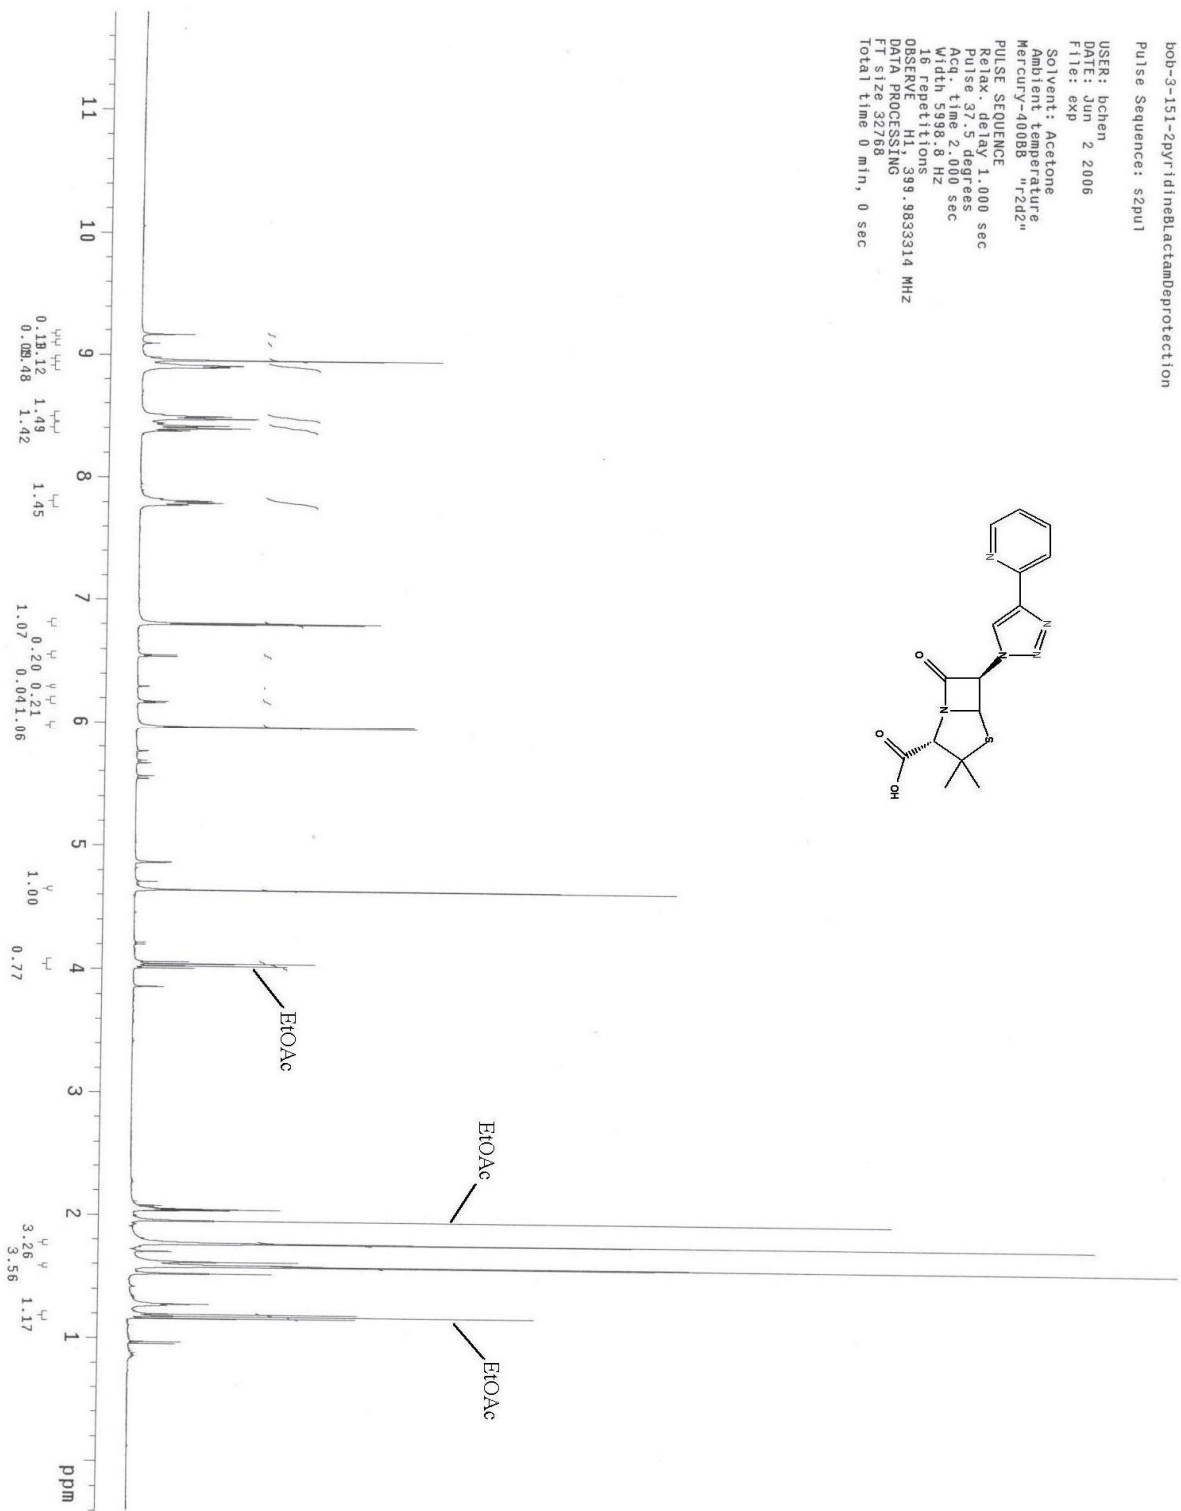

<sup>13</sup>C NMR of 12d:

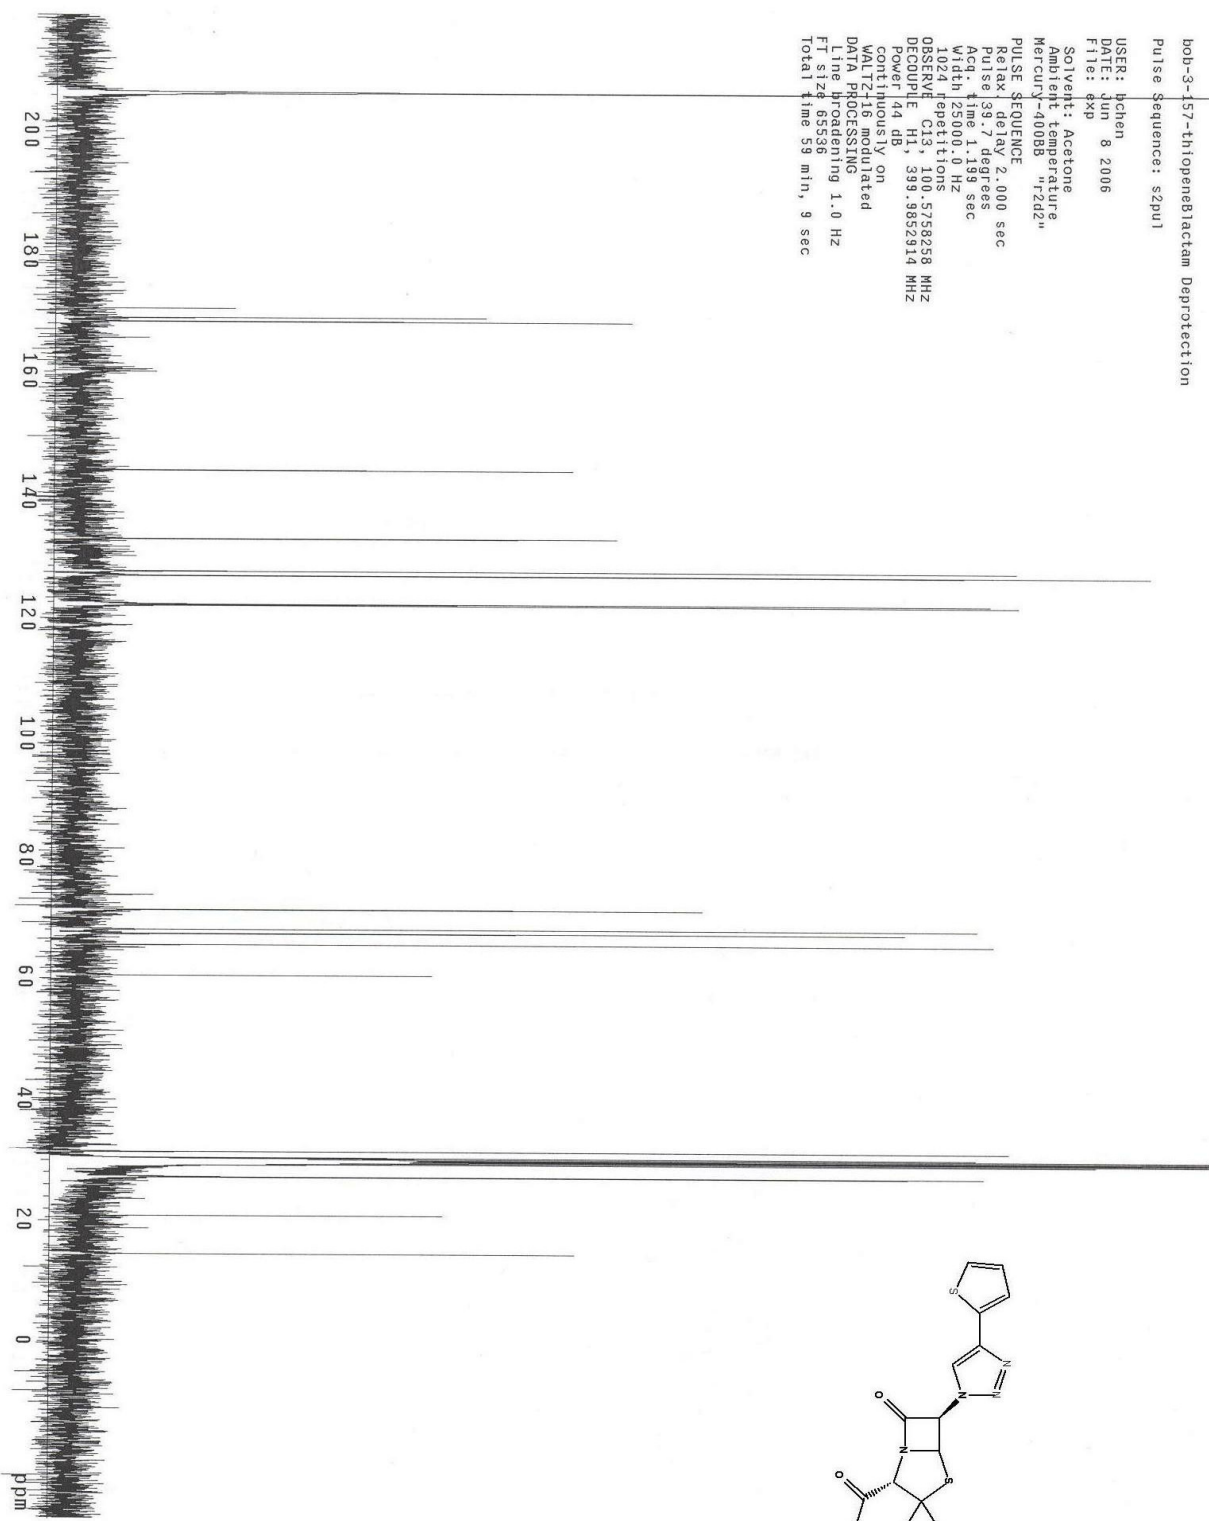

<sup>1</sup>H NMR of 12d:

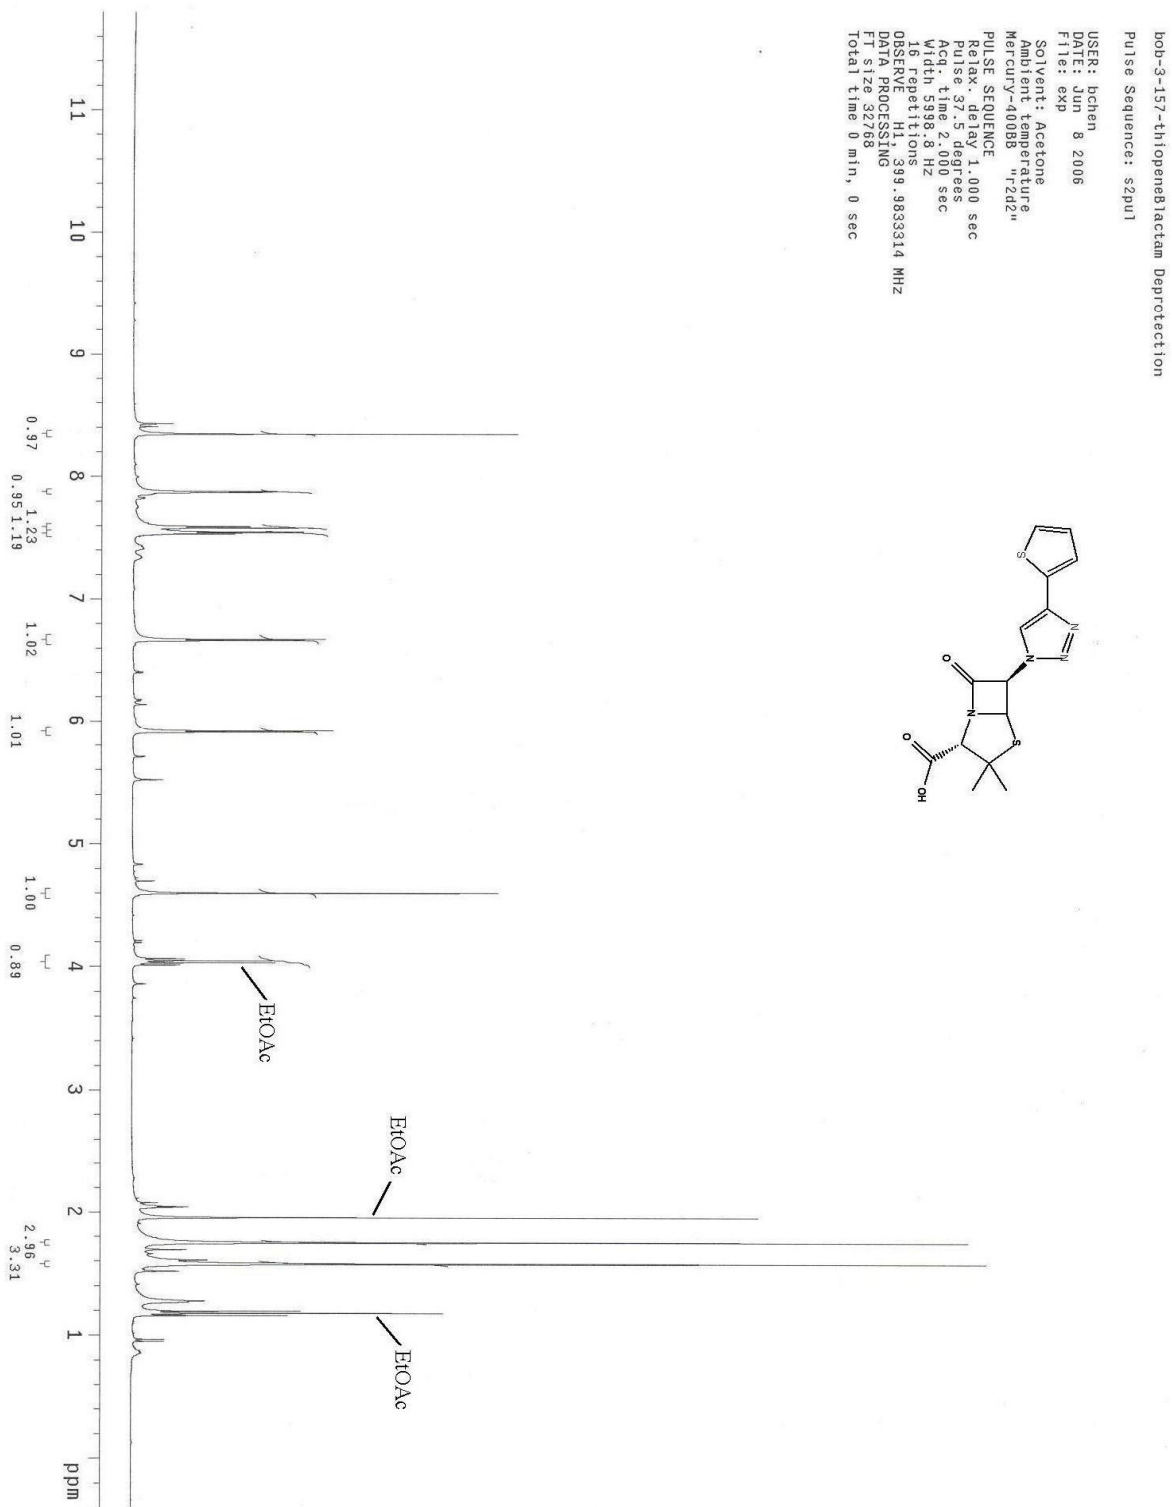

<sup>13</sup>C NMR of 12e:

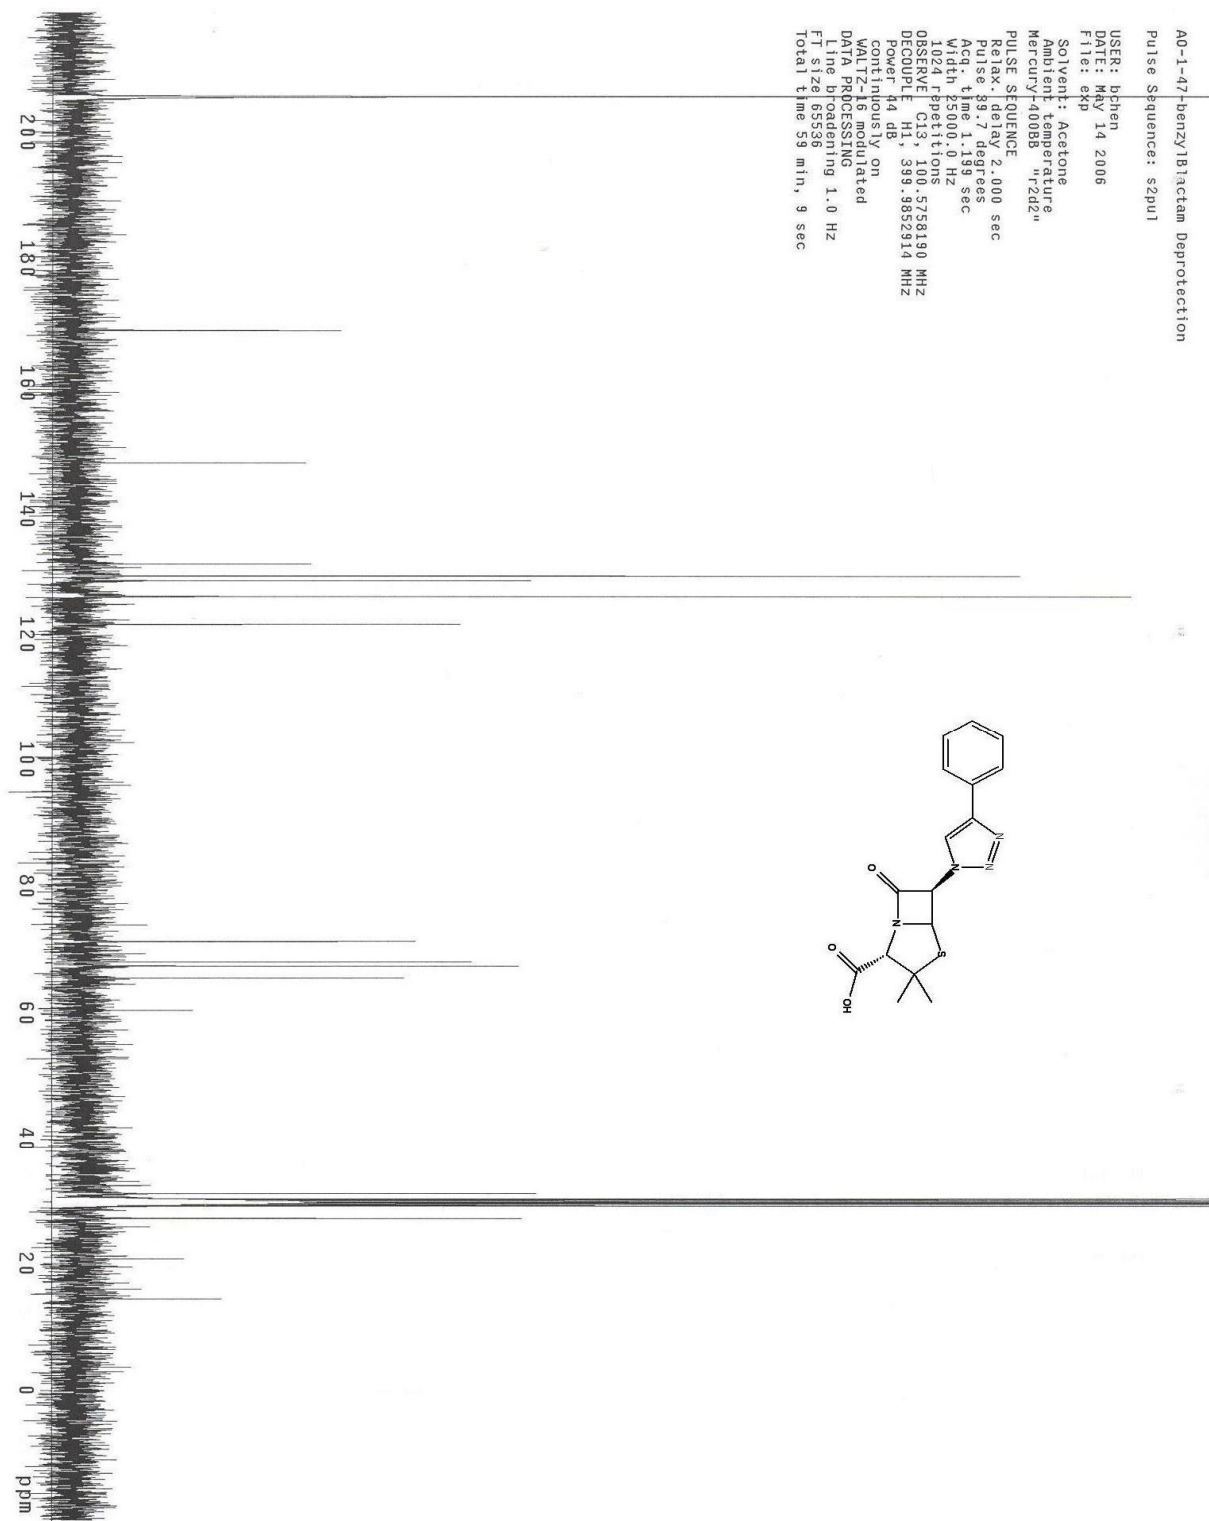

<sup>1</sup>H NMR of 12e:

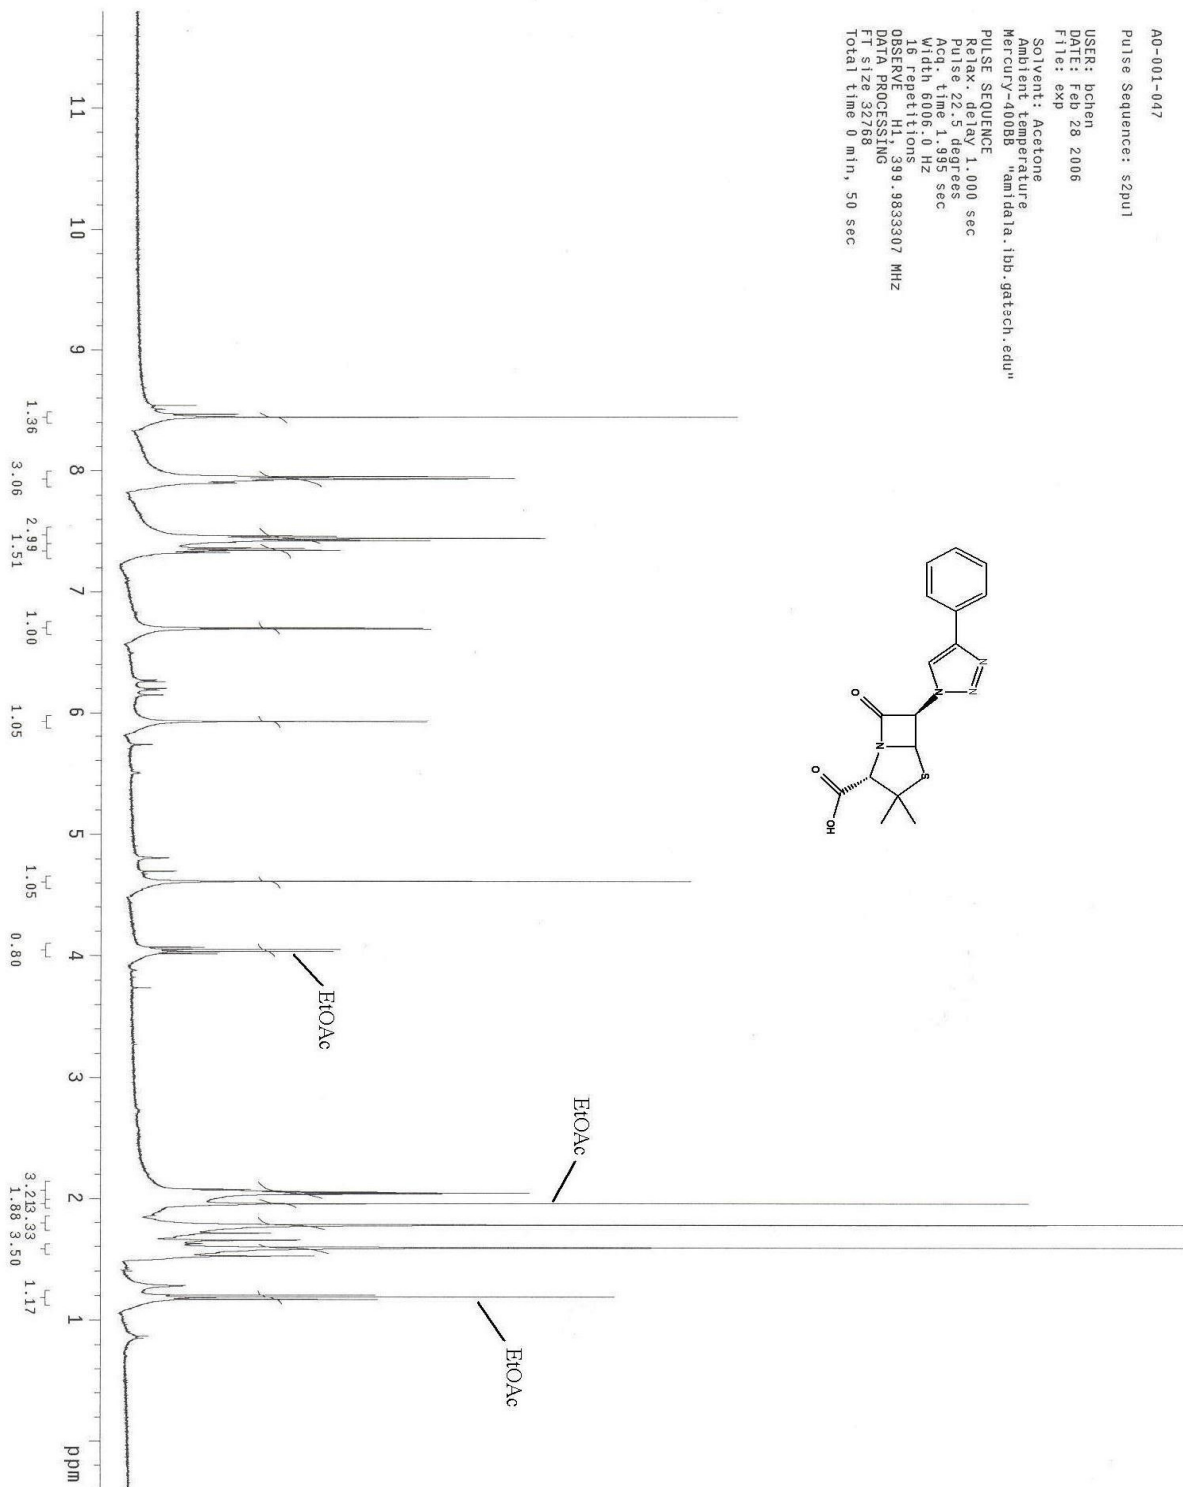

A0-001-047  
Pulse Sequence: s2pul1  
USER: bchen  
DATE: Feb 28 2006  
File: exp  
Solvent: Acetone  
Ambient temperature  
Mercury-400BB "amidata.ibv.gatech.edu"  
PULSE SEQUENCE  
Relax delay 1.000 sec  
Pulse 22.5 degrees  
Acq time 1.995 sec  
Width 6006.0 Hz  
16 repetitions  
OBSERVE H1 399.983307 MHz  
DATA PROCESSING  
FT size 32768  
Total time 0 min, 50 sec

<sup>1</sup>H NMR of 12f:

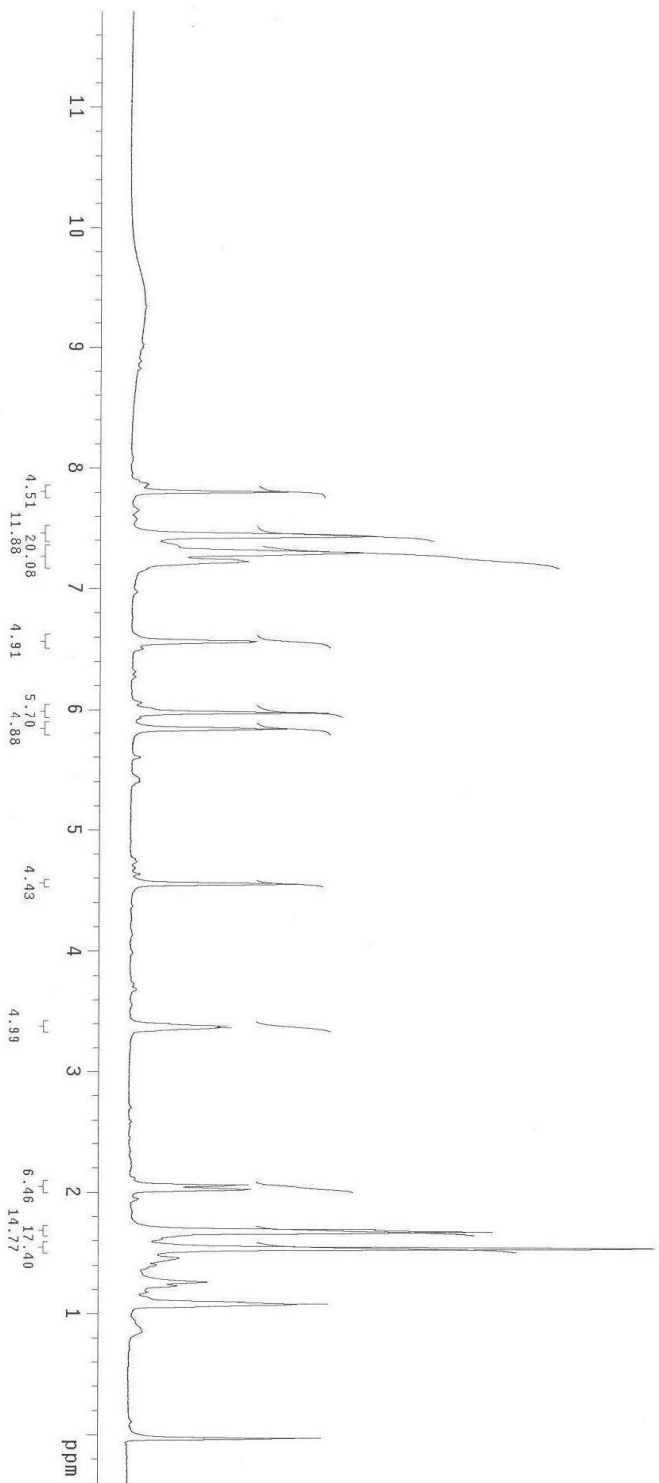

bob-4-39-DeprotBenzylHydroxyBLactam  
Pulse Sequence: szpu1  
USER: bchen  
DATE: Aug 2 2006  
File: exp  
Solvent: Acetone  
Ambient temperature  
Mercury-400SB 1202  
PULSE SEQUENCE  
Relax. delay 1.000 sec  
Pulse 37.5 degrees  
Acq. time 2.000 sec  
Width 5395.8 Hz  
#8 repetitions  
OBSERVED F1 39.9768234 MHz  
DATA PROCESSING  
FT size 32768  
Total time 0 min, 0 sec

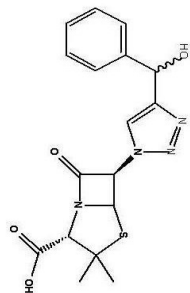

<sup>1</sup>H NMR of 12g:

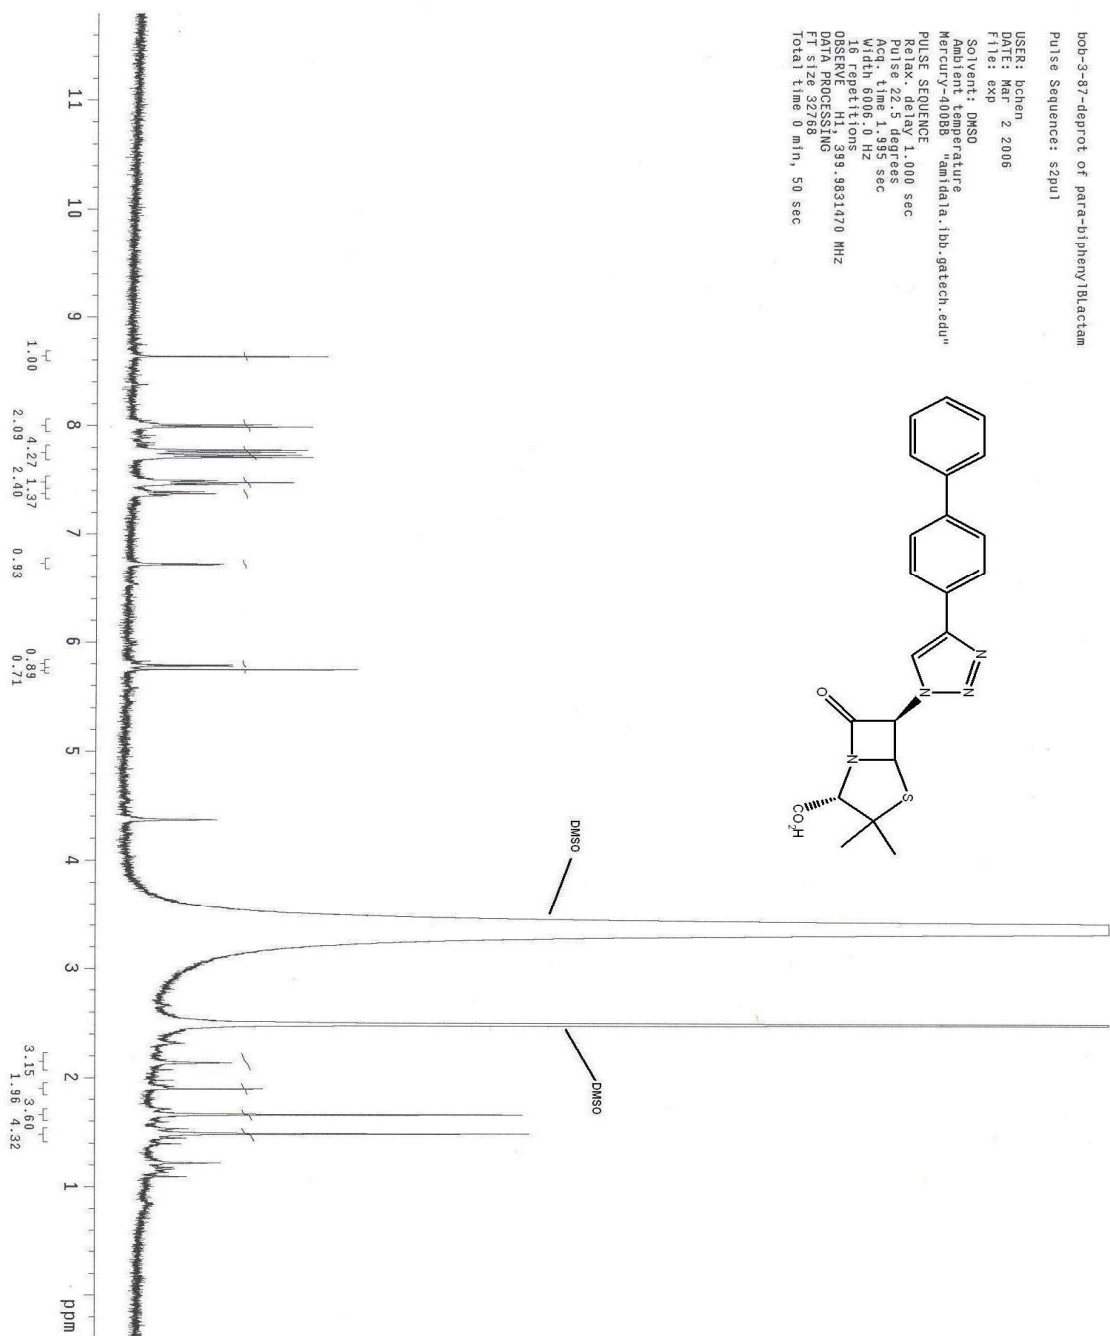



<sup>13</sup>C NMR of 12h:

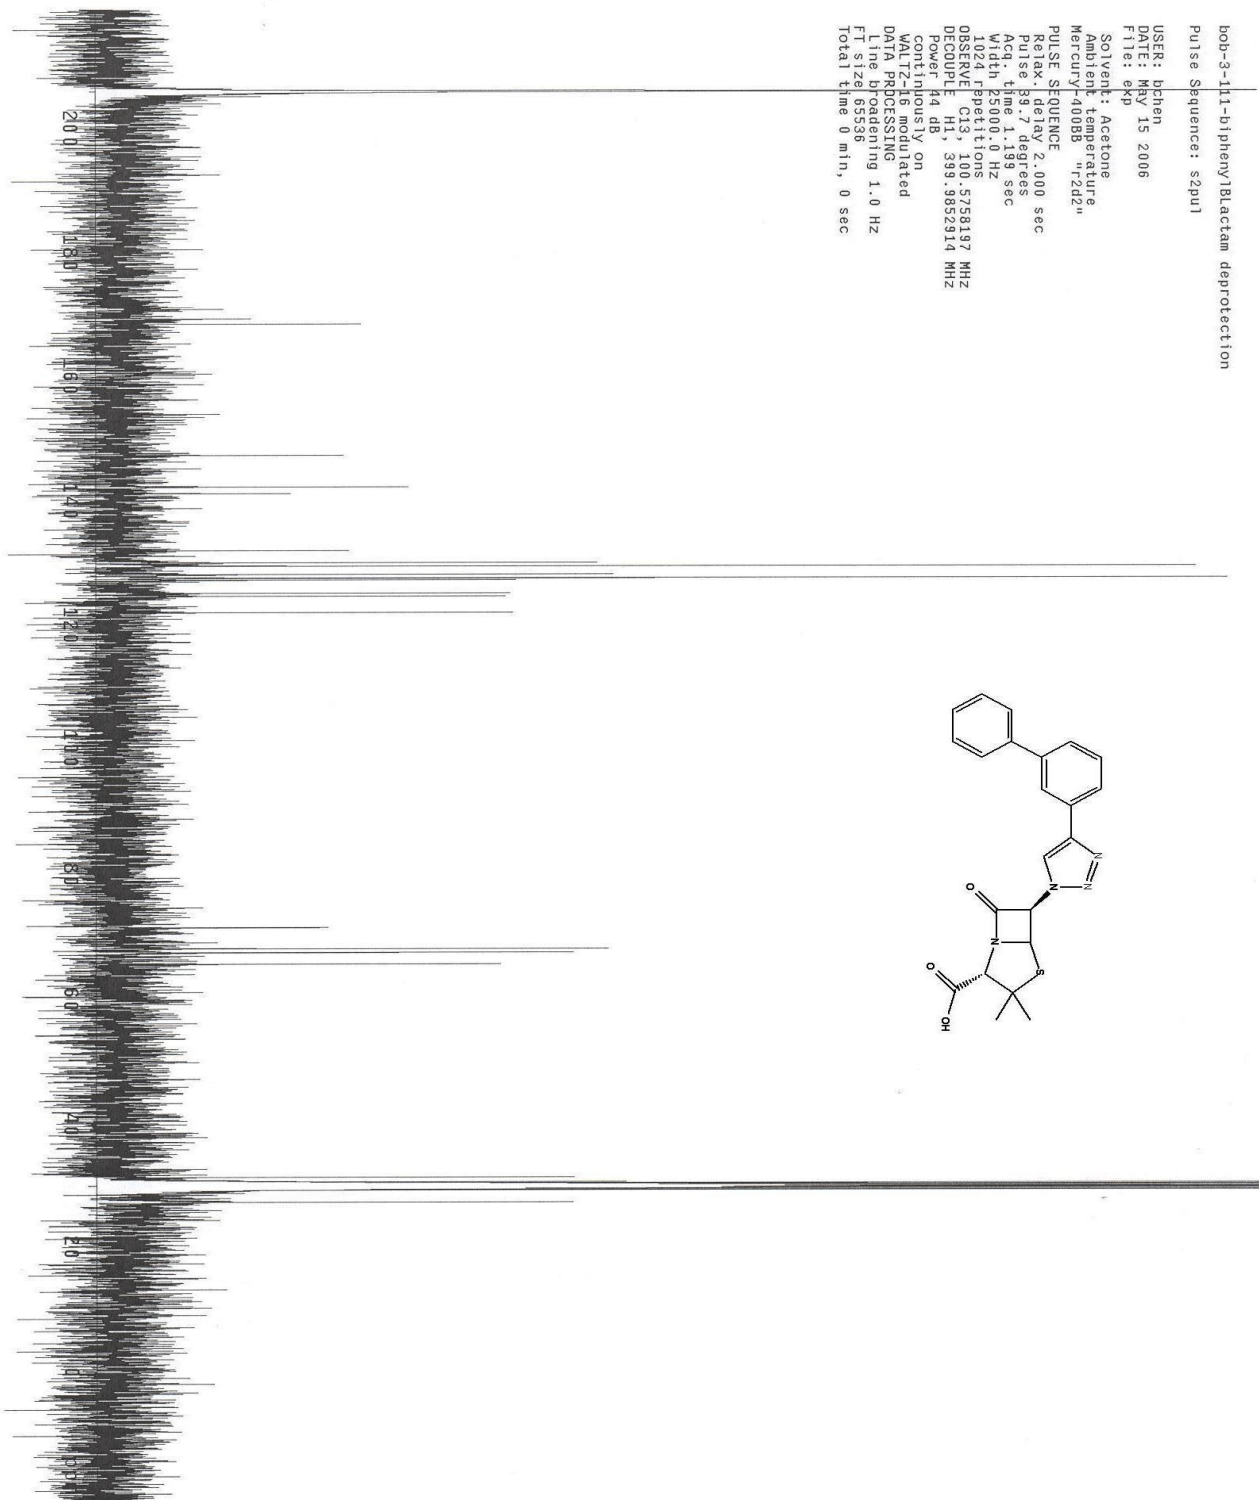

<sup>1</sup>H NMR of 12h:

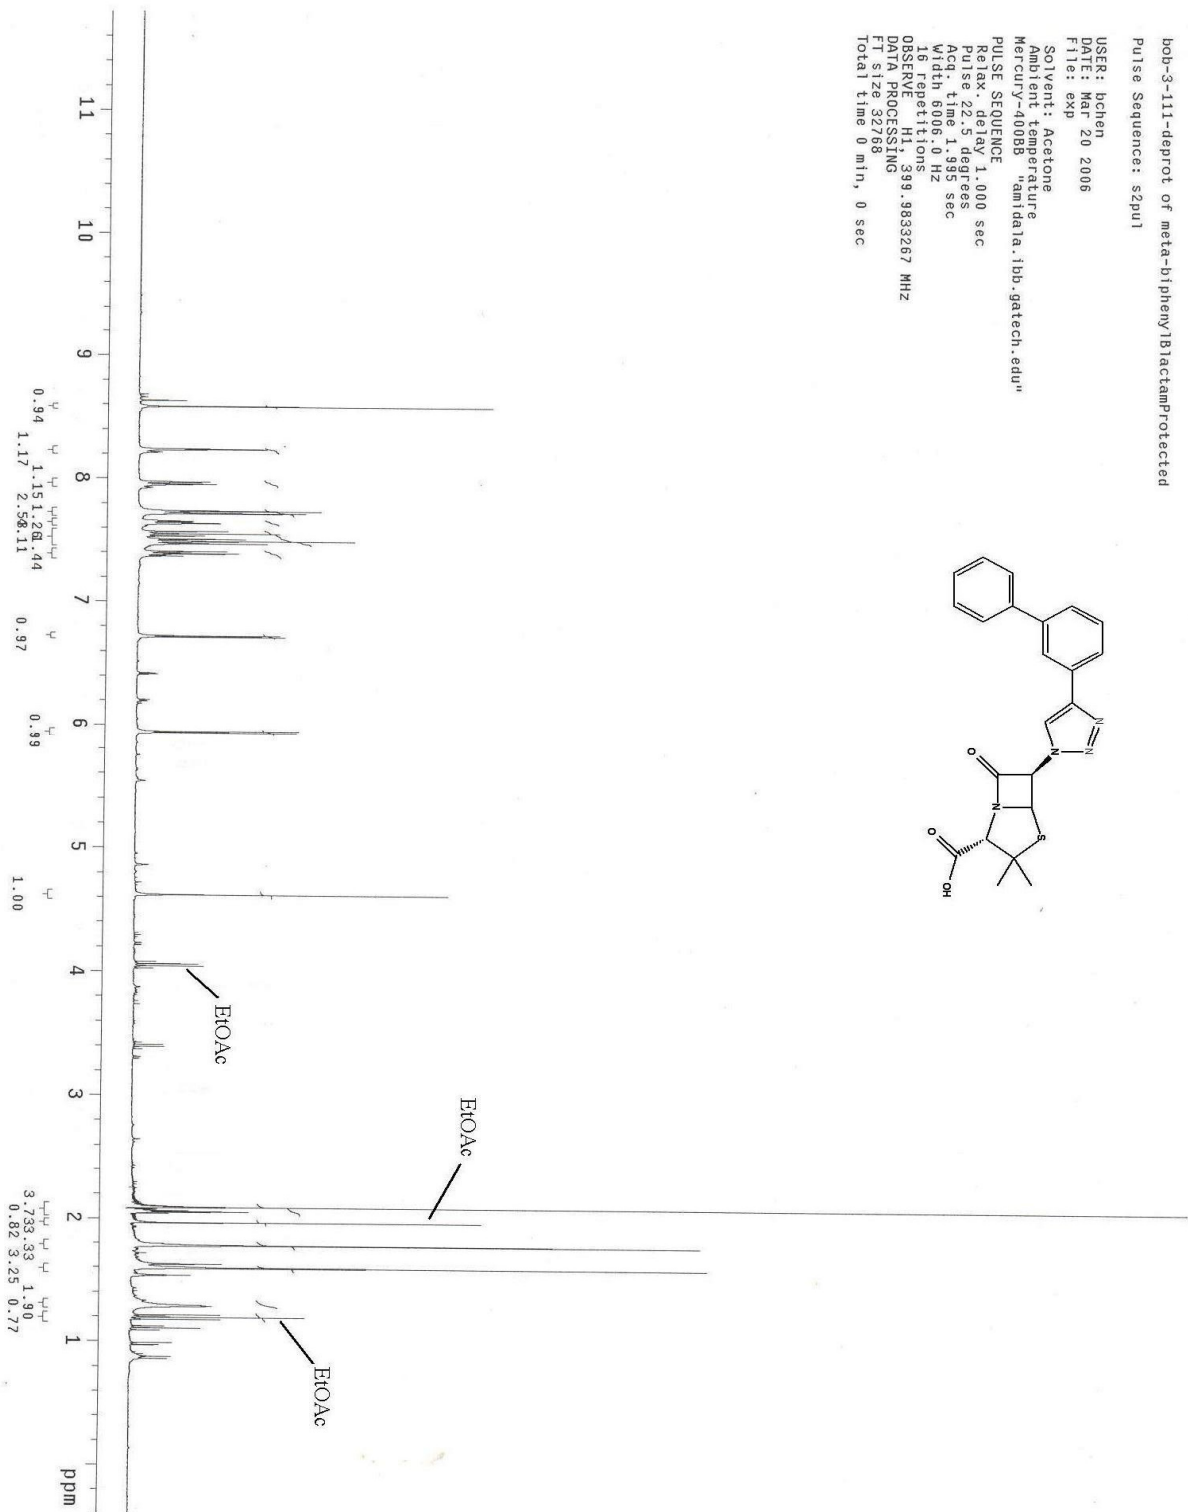

<sup>1</sup>H NMR of 12i:

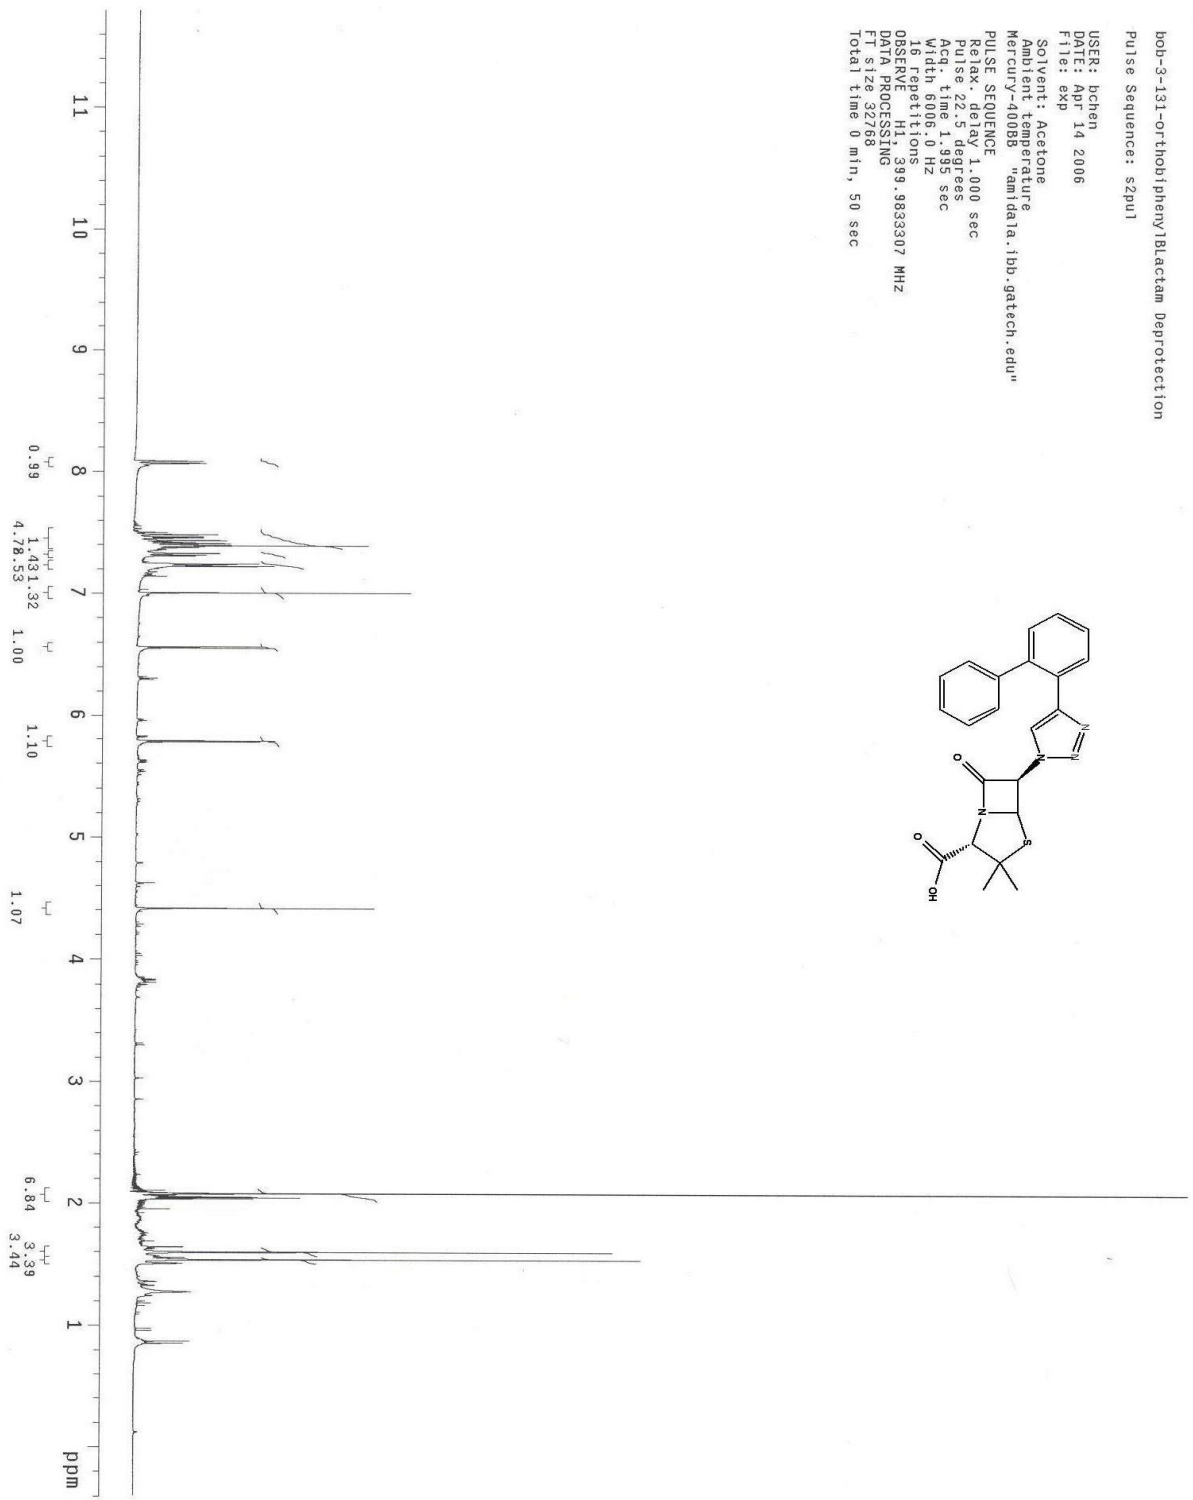

bob-3-131-OrthoIphenylBlactam Deprotection  
Pulse Sequence: szpu1  
USER: bchen  
DATE: Apr 14 2006  
File: exp  
Solvent: Acetone  
Ambient temperature  
Mercury-400DB "amdata.ibp.gatech.edu"  
PULSE SEQUENCE  
Relax. delay 1.000 sec  
Pulse 22.5 degrees  
Acq. time 1.995 sec  
Width 6008.0 Hz  
Observed F1  
Repetitions 39.9833307 MHz  
DATA PROCESSING  
FT size 32768  
Total time 0 min, 50 sec

<sup>13</sup>C NMR of 12j:

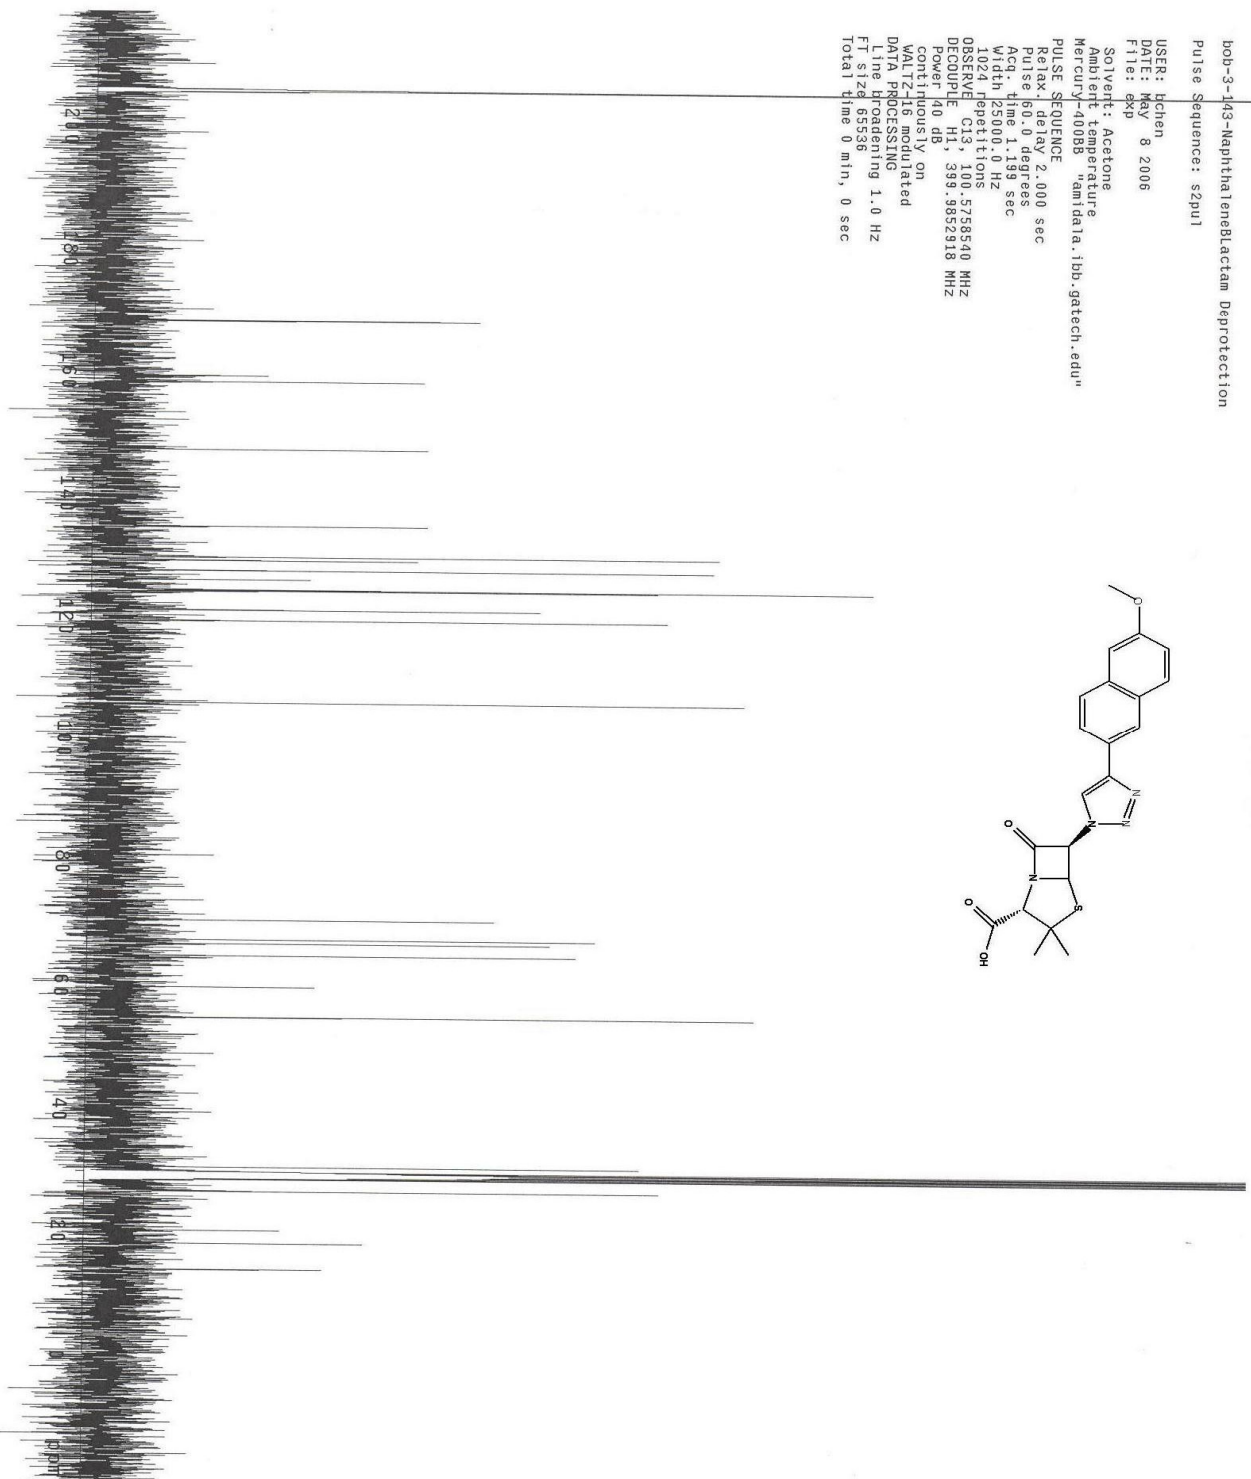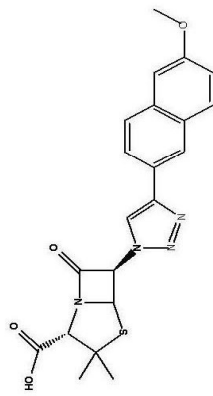

bob-3-143-NaphthaleneBLactam Deprotection  
Pulse Sequence: szpu1  
USER: hchen  
DATE: May 8 2008  
File: exp  
Solvent: Acetone  
Ambient temperature  
Mercury-400BB "amida1a.1lb.gatech.edu"  
PULSE SEQUENCE  
Relax delay 2.000 sec  
Pulse 60.0 degrees  
Acq. time 1.19 sec  
Width 25000.0 Hz  
1024 repetitions  
OBSERVE C13, 100.5758540 MHz  
DECOUPLE H1, 399.9852918 MHz  
Power 40 db  
continuously on  
WALTZ16 modulated  
DATA PROCESSING  
Line broadening 1.0 Hz  
FT size 65536  
Total time 0 min, 0 sec

<sup>1</sup>H NMR of 12j:

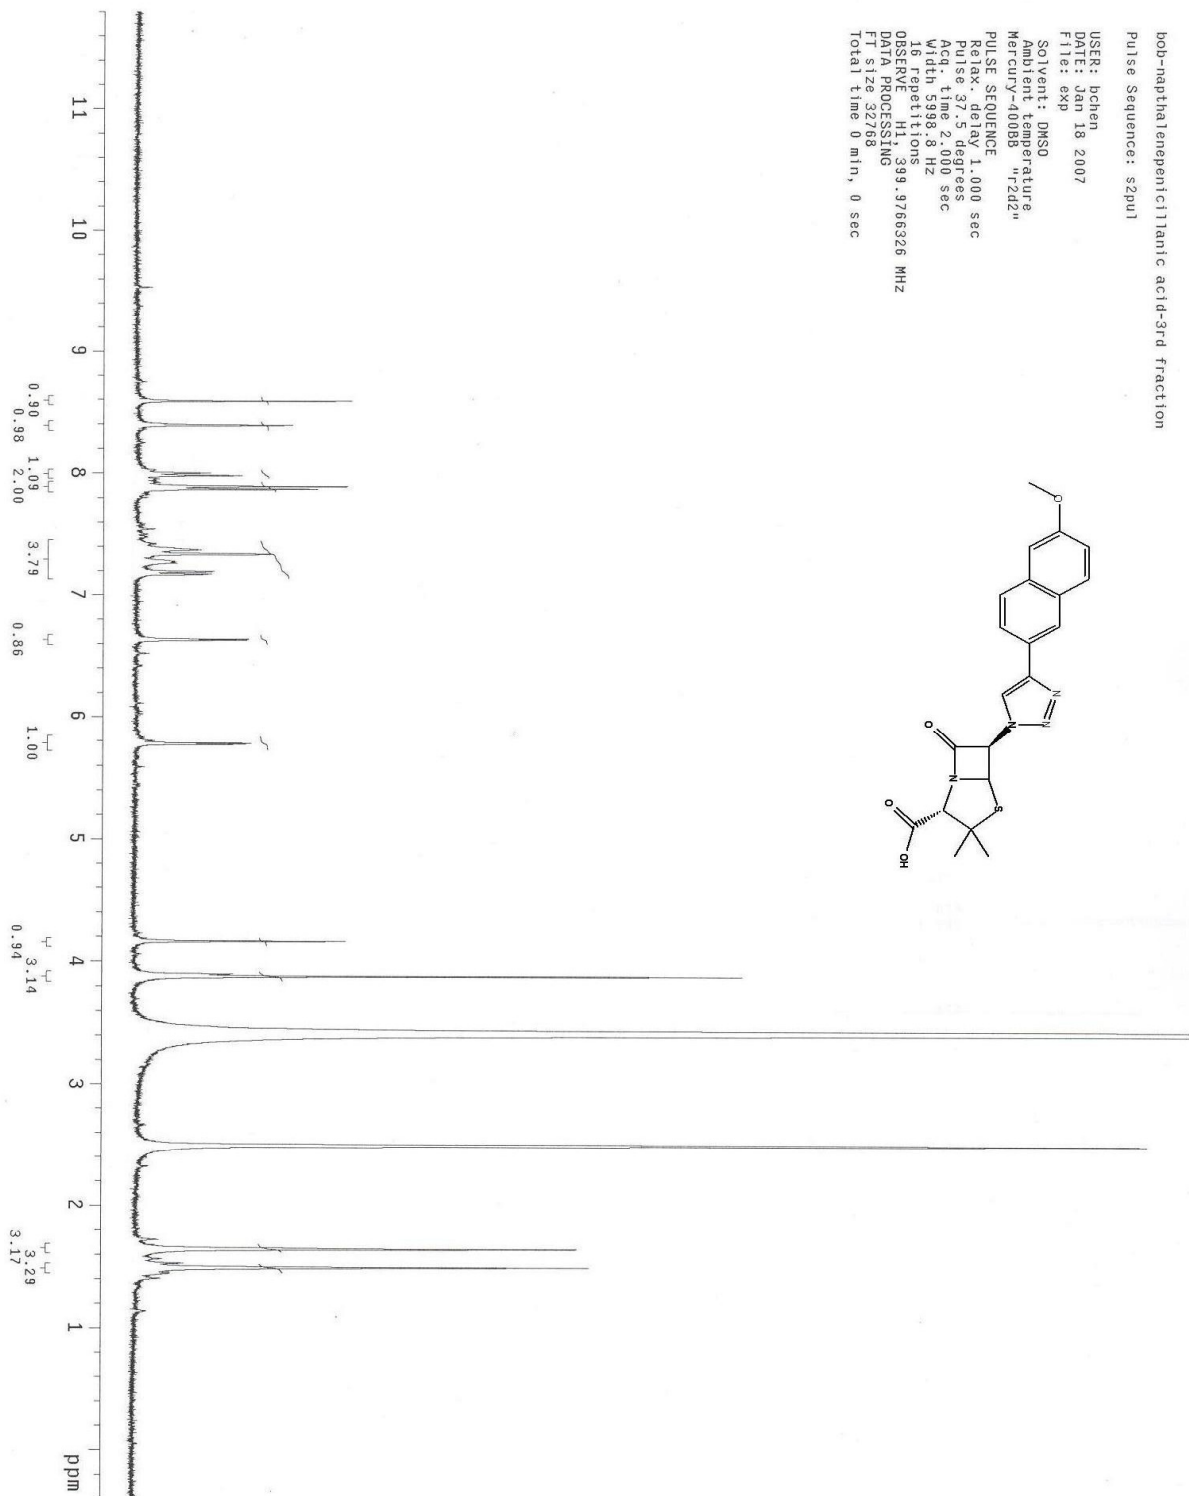

<sup>1</sup>H NMR of 12k:

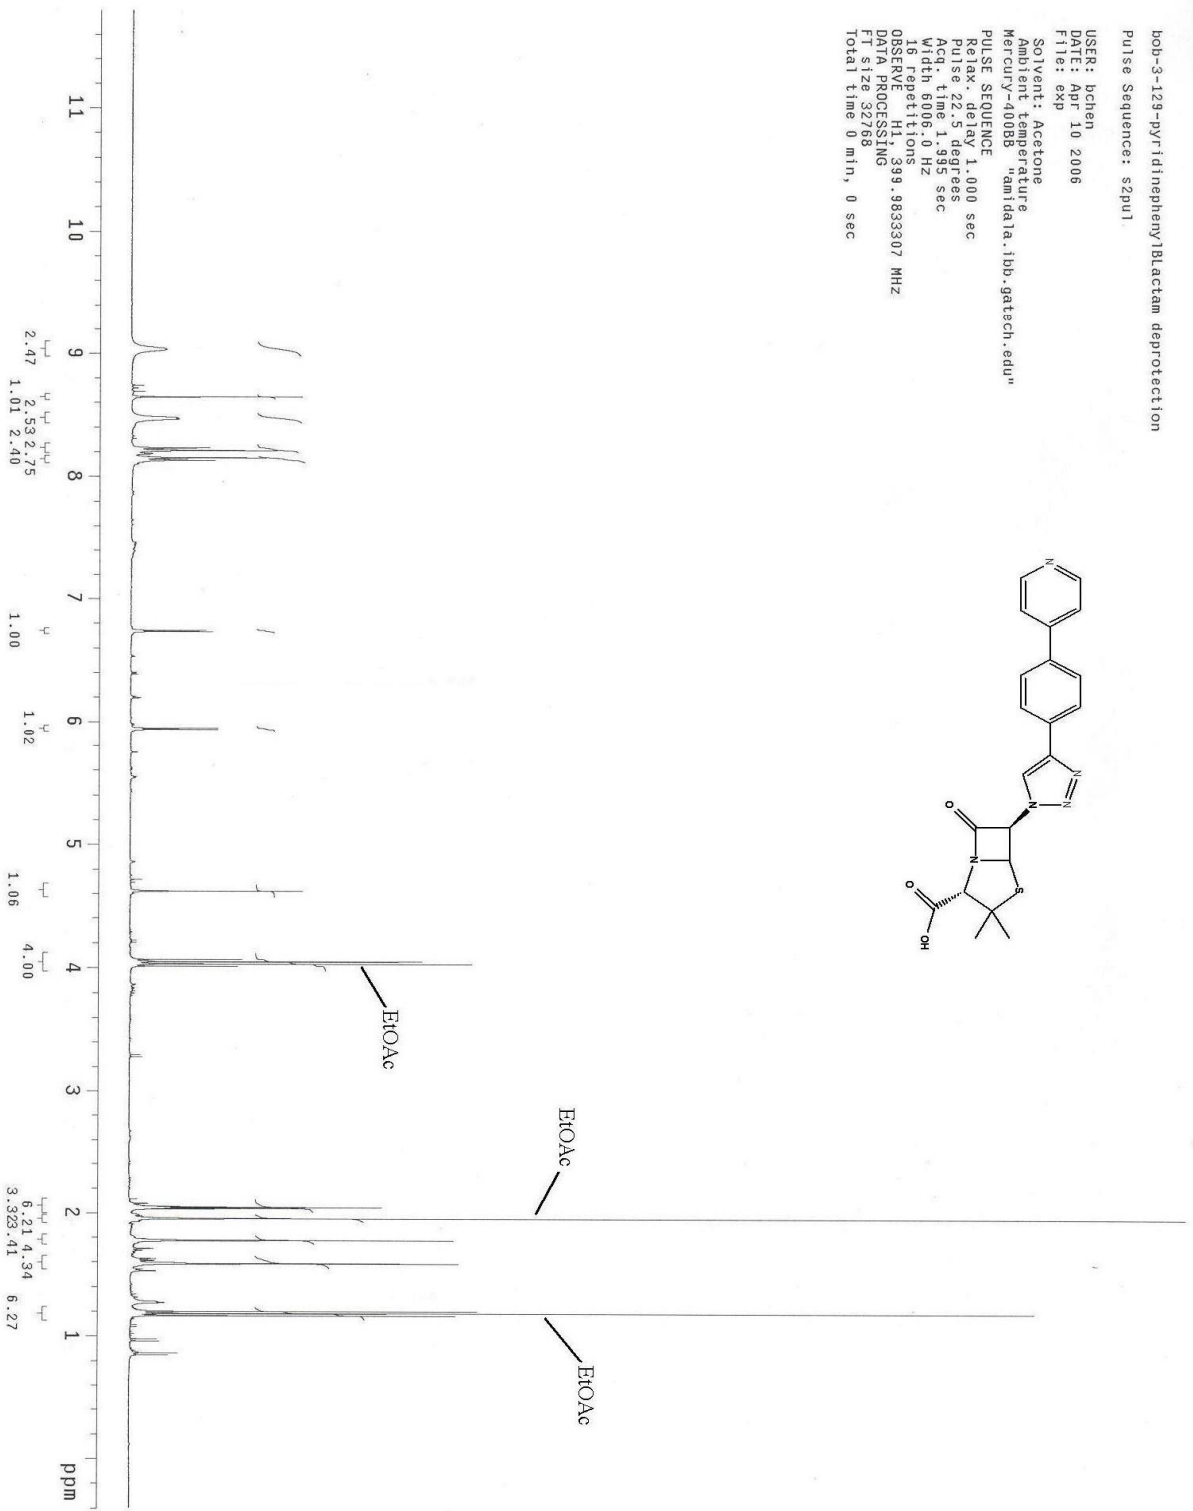

<sup>1</sup>H NMR of 12l:

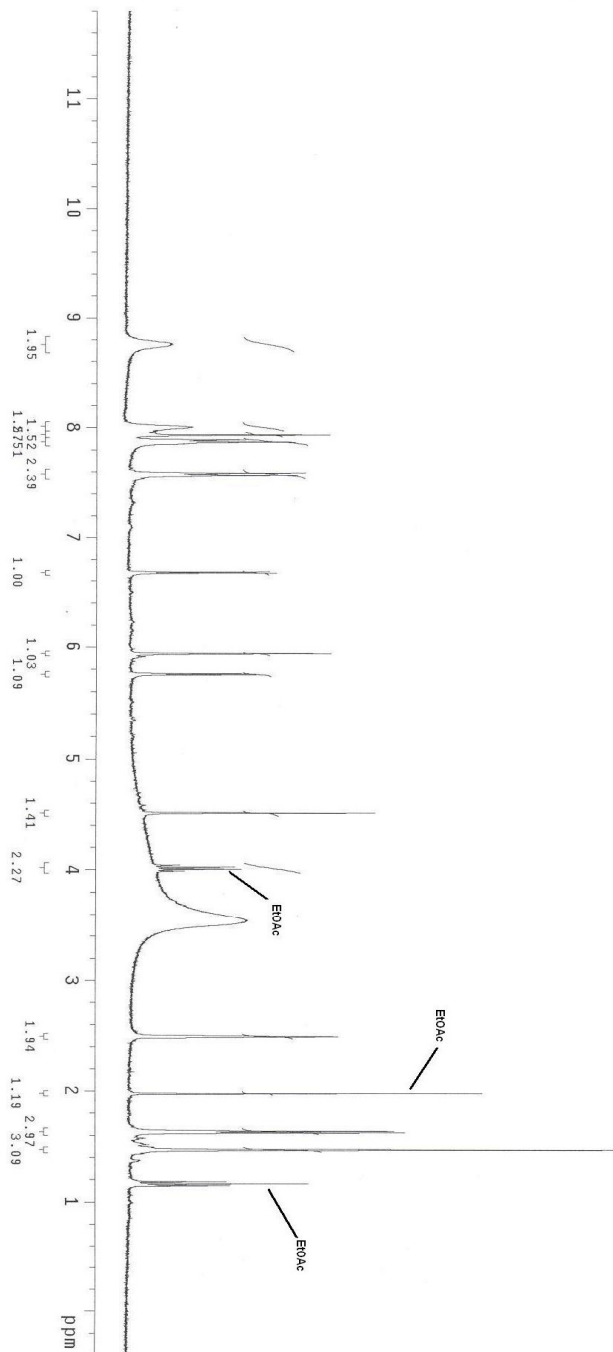

bob453-pyr-1diphenylhydroxy/1betaetamiasat  
Pulse Sequence: szpu1  
USER: bchen  
DATE: Aug 9 2006  
File: exp  
Solvent: DMSO  
Ambient temperature  
Mercury-400B8 "r2d2"  
PULSE SEQUENCE  
Relax. delay 1.000 sec  
Pulse 37.5 degrees  
Acq. time 2.000 sec  
Width 5398.8 Hz  
Spectral width 93.9766329 MHz  
Observed 11  
DATA PROCESSING  
FT size 32788  
Total time 0 min, 50 sec

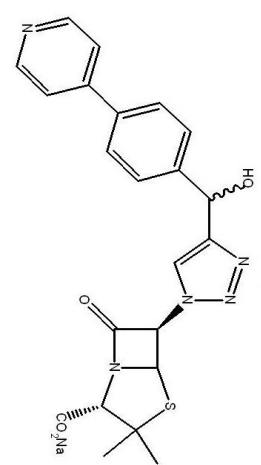

Supplement: NIHMS32975-supplement-01.pdf [file NIHMS32975-supplement-01.pdf]
